# Supplementary material
Source: MDPI journal article supplement (https://www.mdpi.com/1996-1073/15/9/3463)
Supplement: s1 [file s1]

# Evaluation of various tree-based ensemble models for estimating solar energy resource potential in different climatic zones of China

Zhigao Zhou<sup>1,2</sup>, Aiwen Lin<sup>2</sup>, Lijie He<sup>3,\*</sup>, Lunche Wang<sup>4</sup>

<sup>1</sup>Shenzhen Longhua High School, Longhua District, Shenzhen City 518109, China; leehong@whu.edu.cn

<sup>2</sup> School of Resource and Environmental Science, Wuhan University, Wuhan 430079, China; awlin@whu.edu.cn

<sup>3</sup>College of Public Administration, Huazhong Agricultural University, Wuhan 430070, China; helijie@mail.hzau.edu.cn

<sup>4</sup>Laboratory of Critical Zone Evolution, School of Earth Sciences, China University of Geosciences, Wuhan 430074, China; wang@cug.edu.cn

\* Correspondence: [helijie@mail.hzau.edu.cn](mailto:helijie@mail.hzau.edu.cn)

## Contents of this file

Figures S1 to S16

Tables S1 to S17

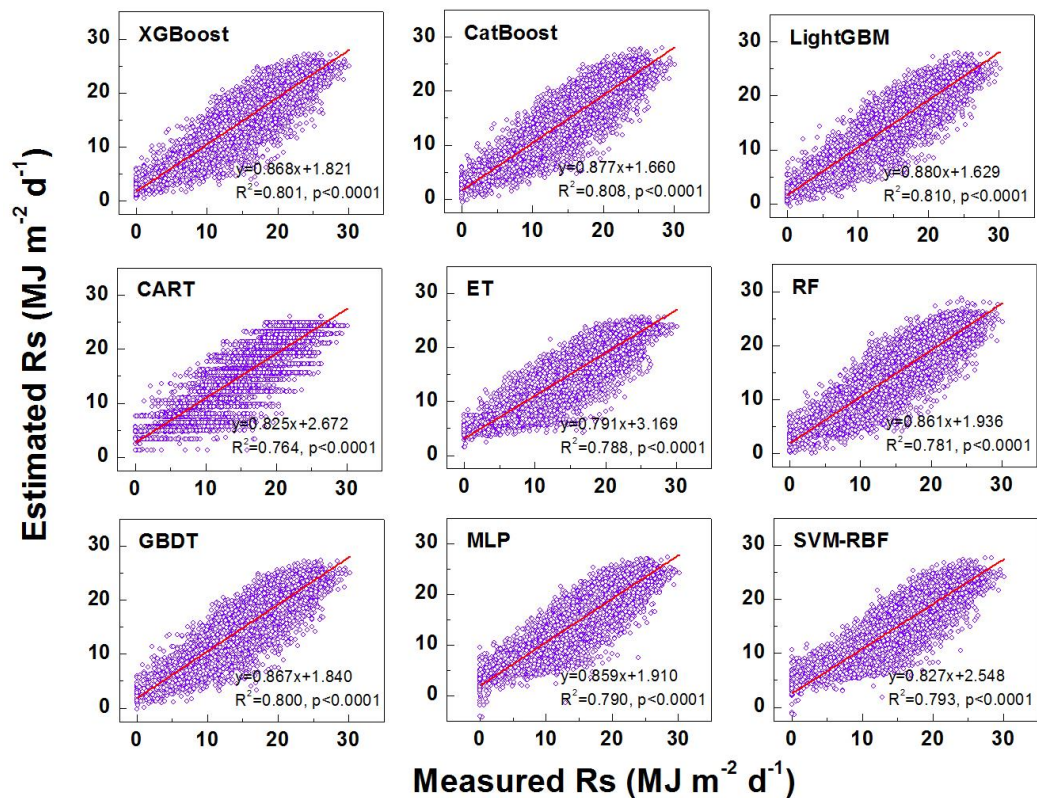

Figure S1. The  $R_s$  estimates of the developed algorithms versus measurements at

Sanya station under complete input combinations.

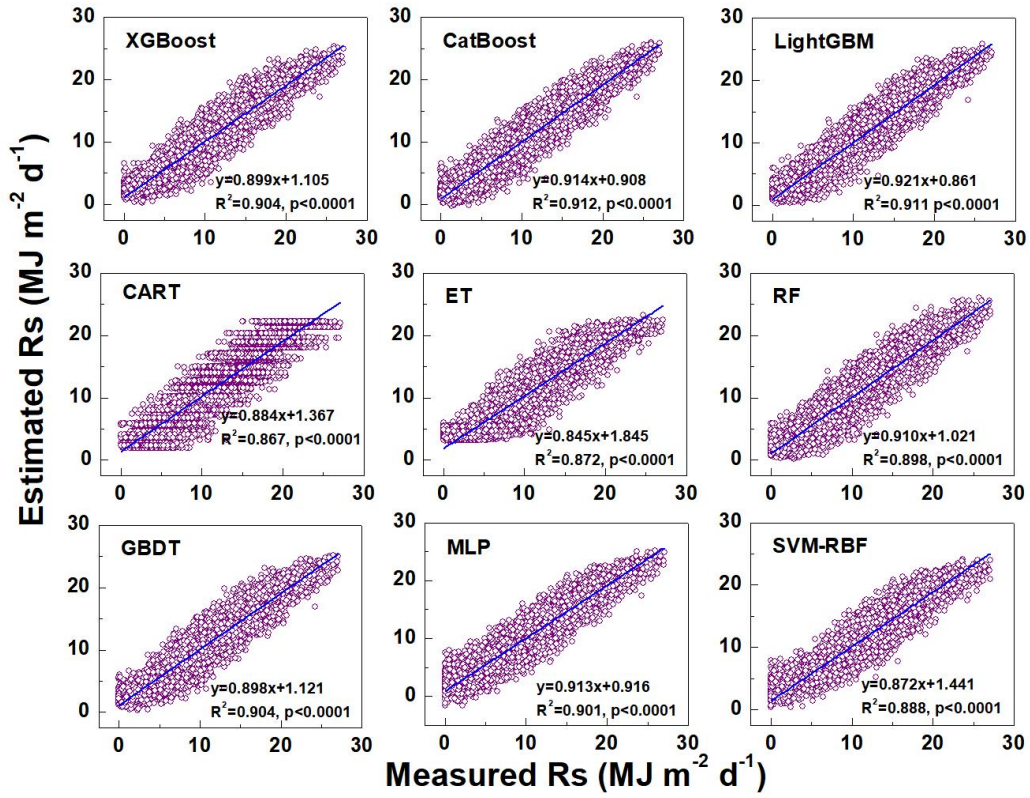

Figure S2. Same as Figure S1 but at Guangzhou station.

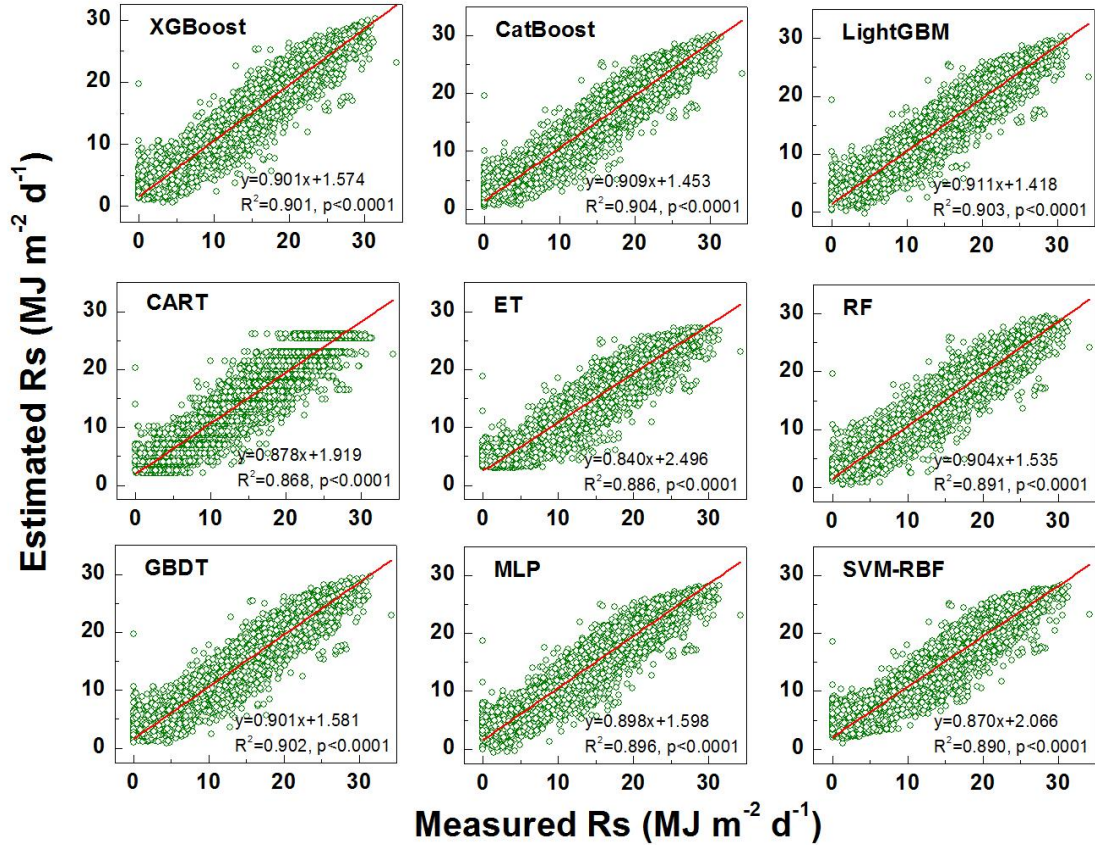



**Figure S3.** Same as Figure S1 but at Kunming station.

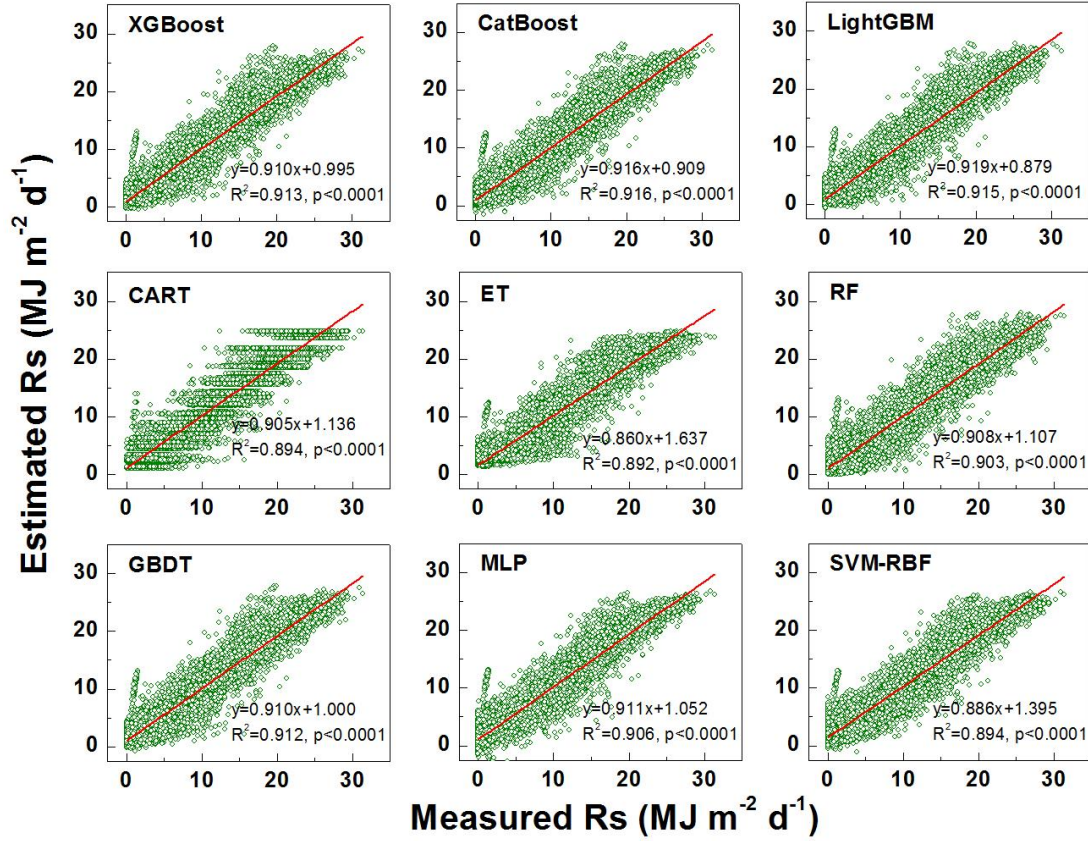

**Figure S4.** Same as Figure S1 but at Wuhan station.

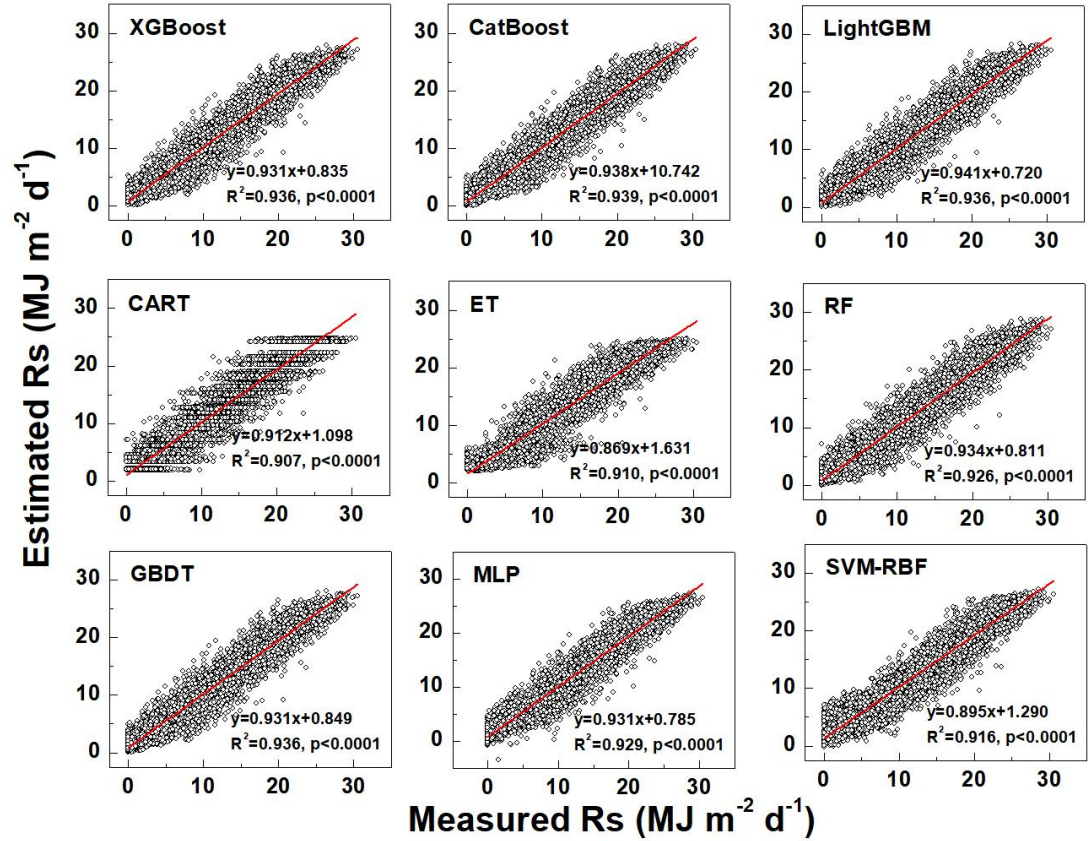

**Figure S5.** Same as Figure S1 but at Shanghai station.

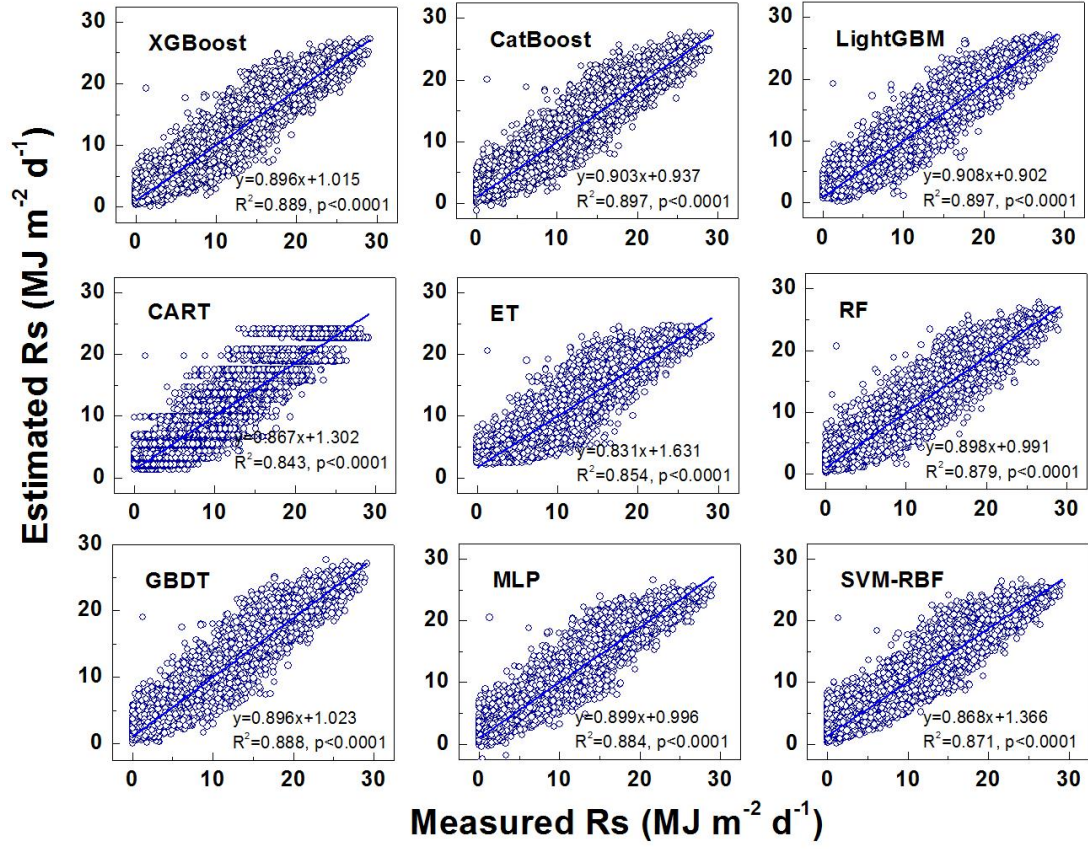

**Figure S6.** Same as Figure S1 but at Chengdu station.



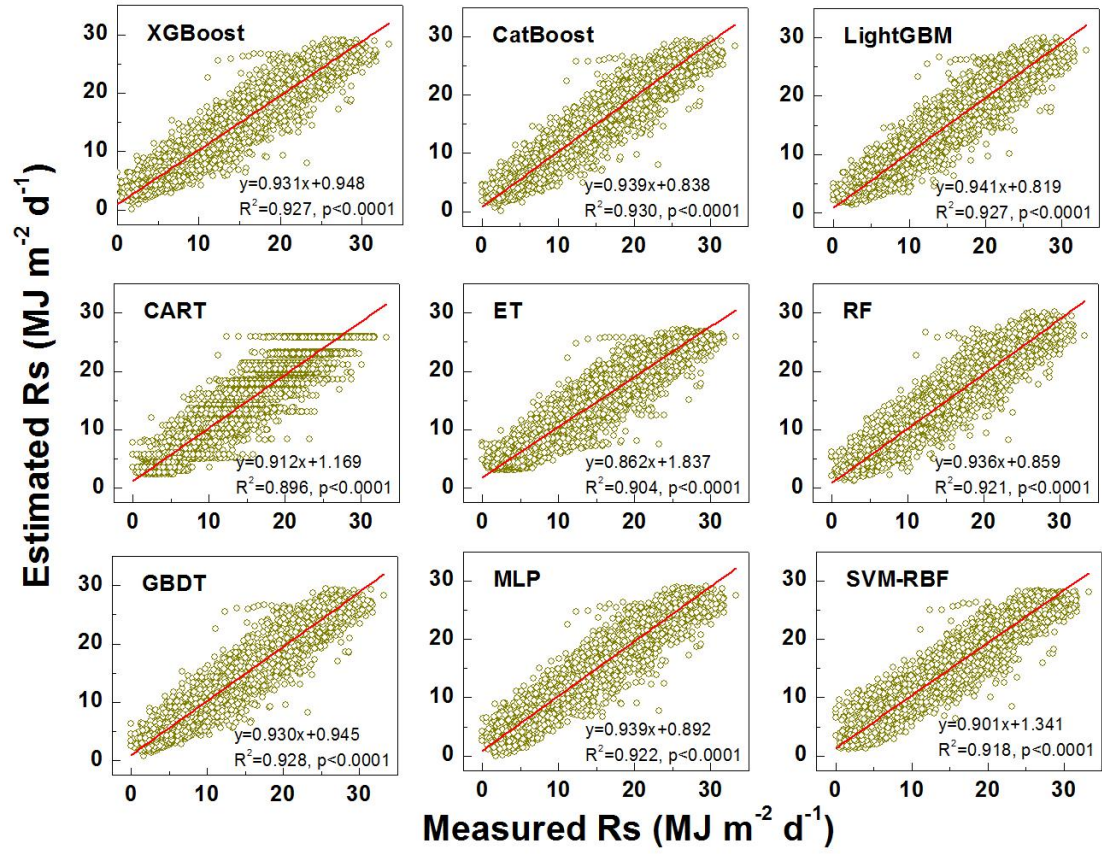

Figure S7. Same as Figure S1 but at Haerbin station.

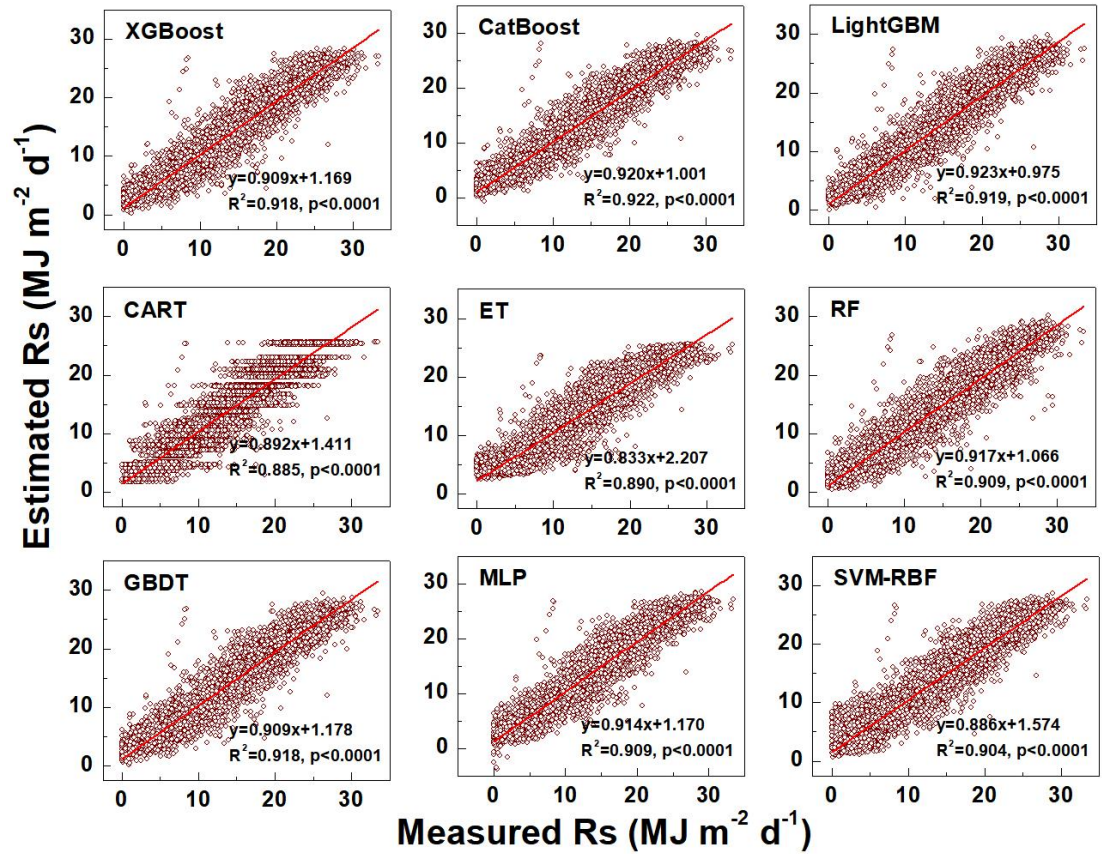

Figure S8. Same as Figure S1 but at Shenyang station.

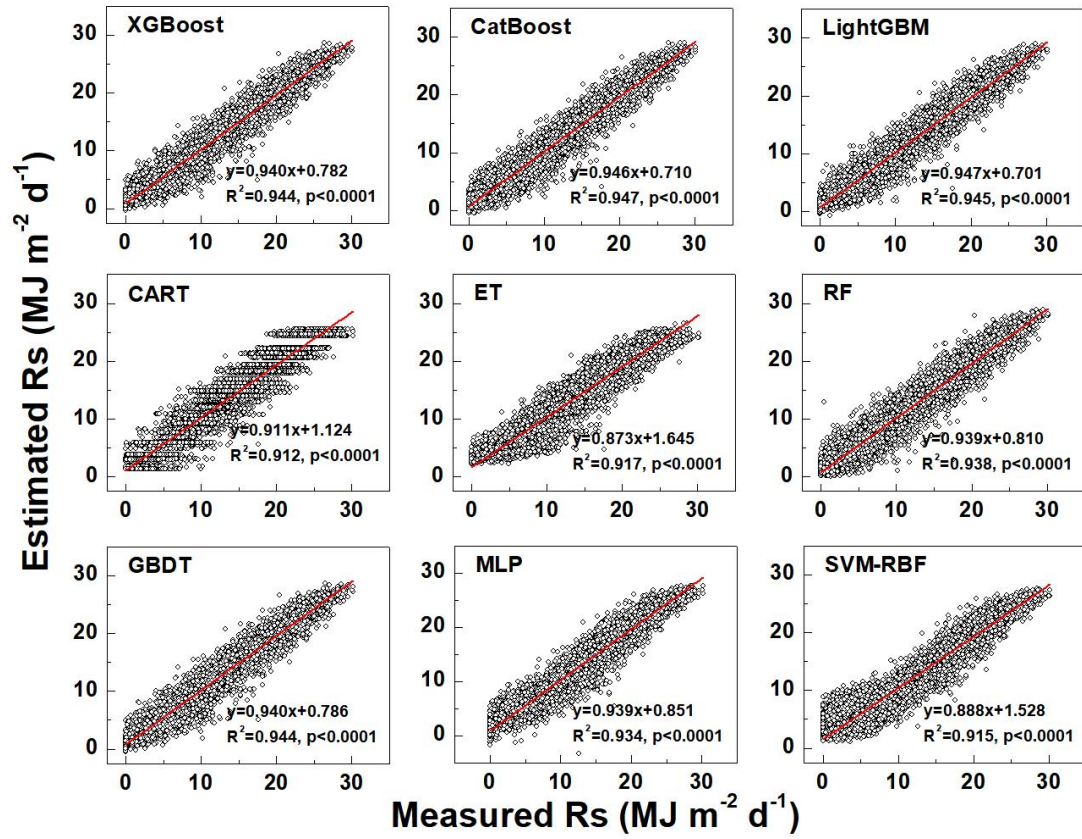

Figure S9. Same as Figure S1 but at Zhengzhou station.

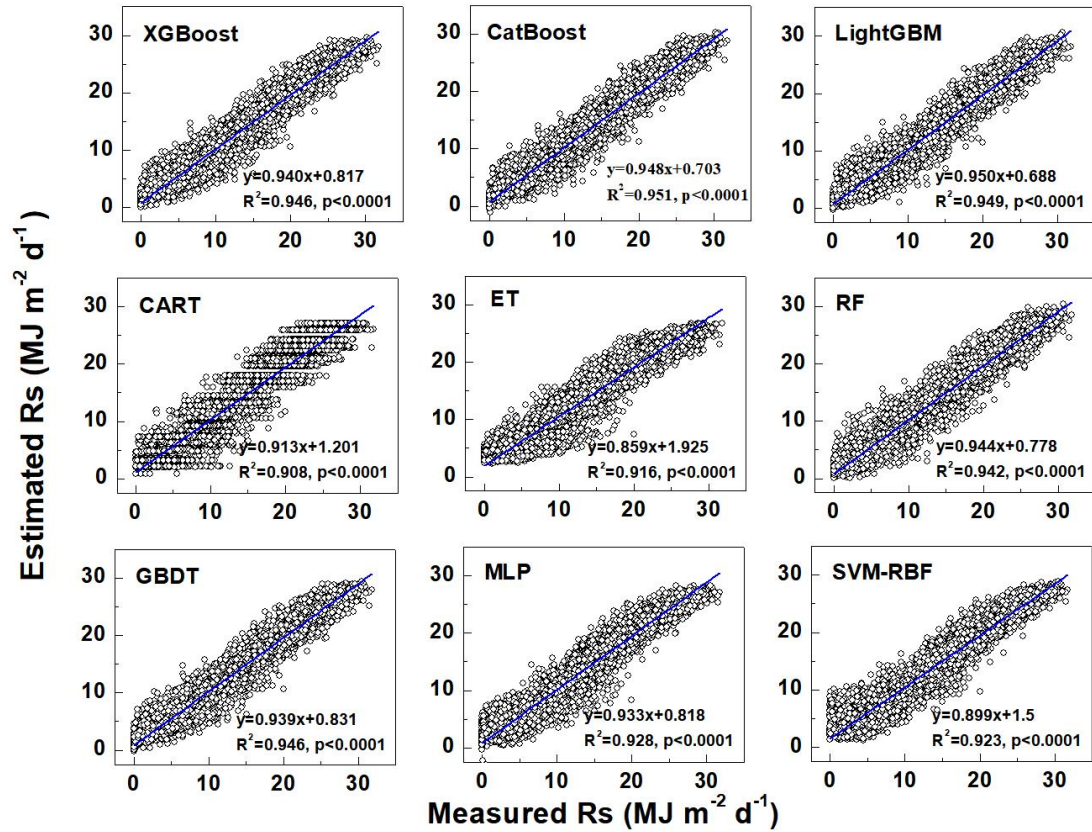

Figure S10. Same as Figure S1 but at Beijing station.



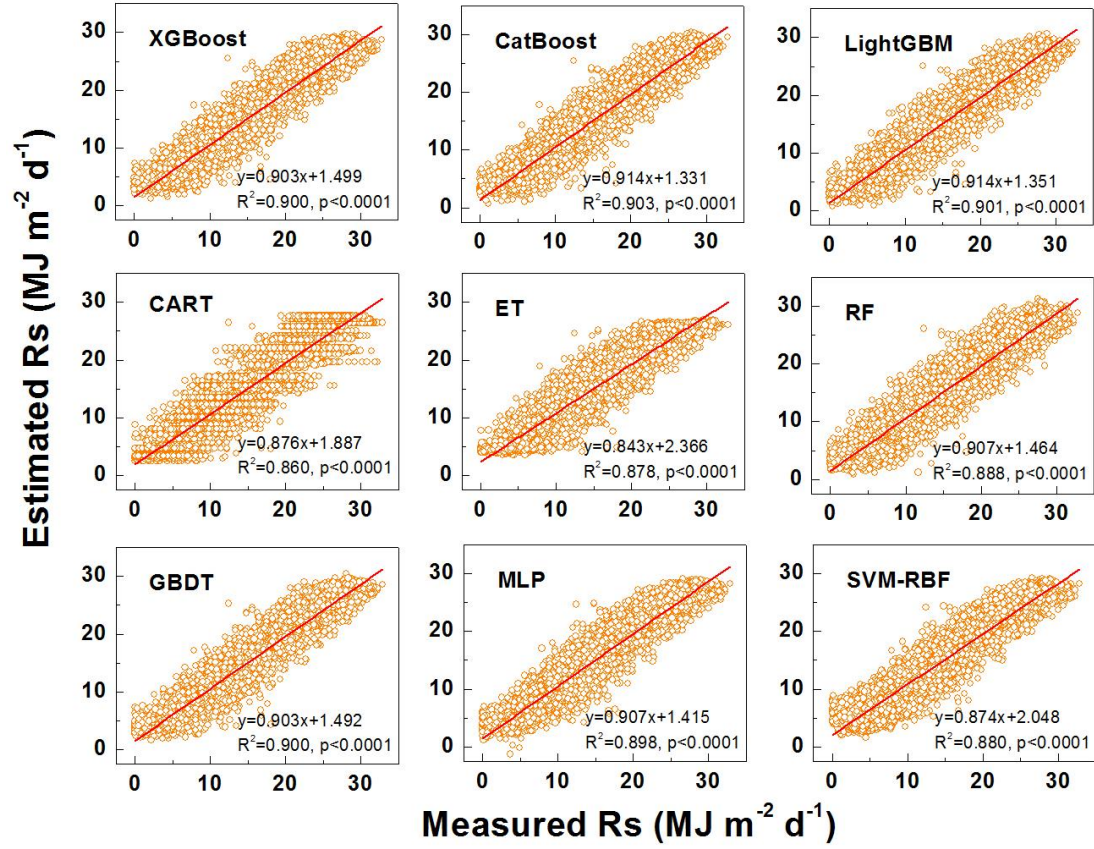

Figure S11. Same as Figure S1 but at Lanzhou station.

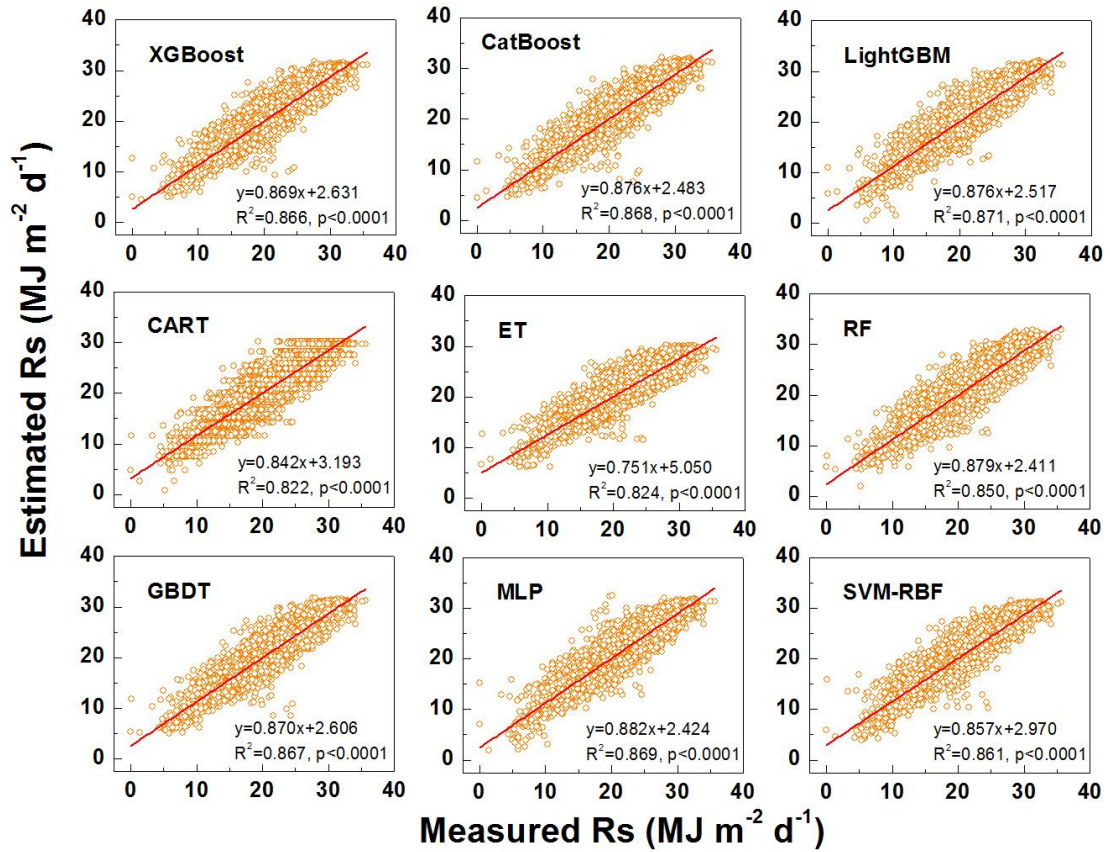

Figure S12. Same as Figure S1 but at Lasa station.

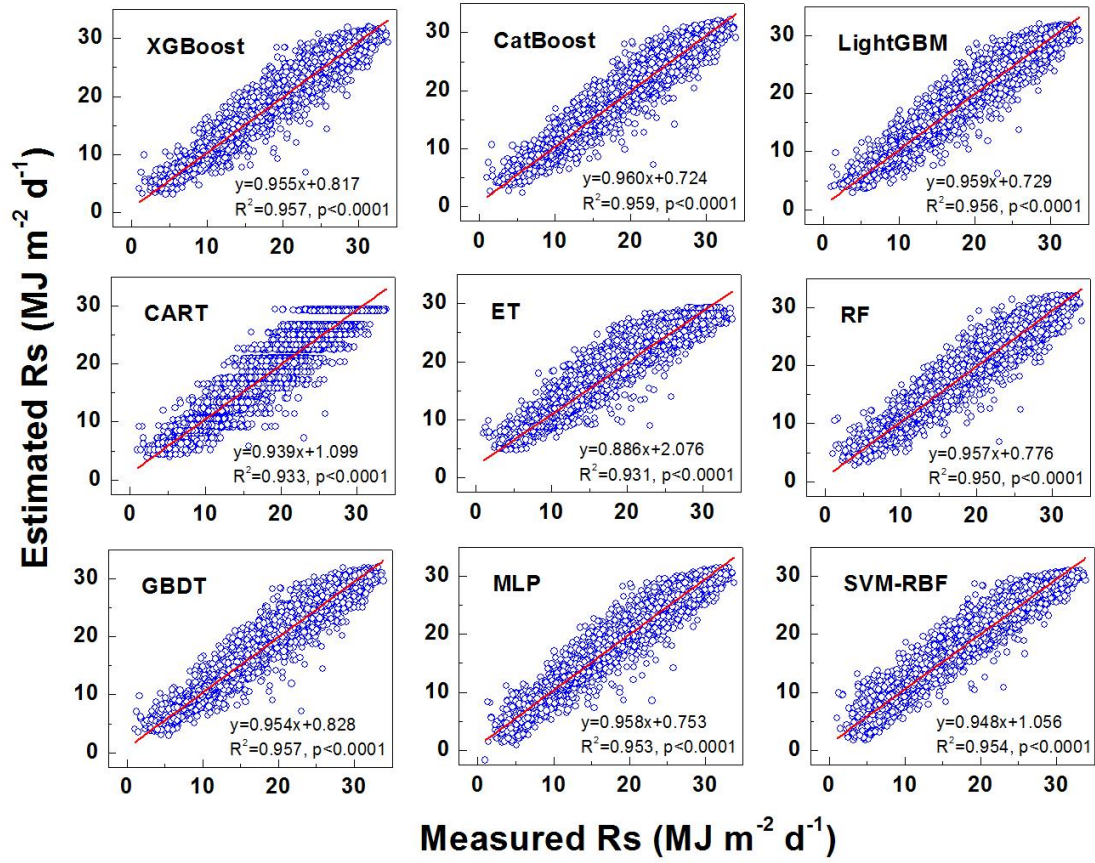

Figure S13. Same as Figure S1 but at Ejinaqi station.

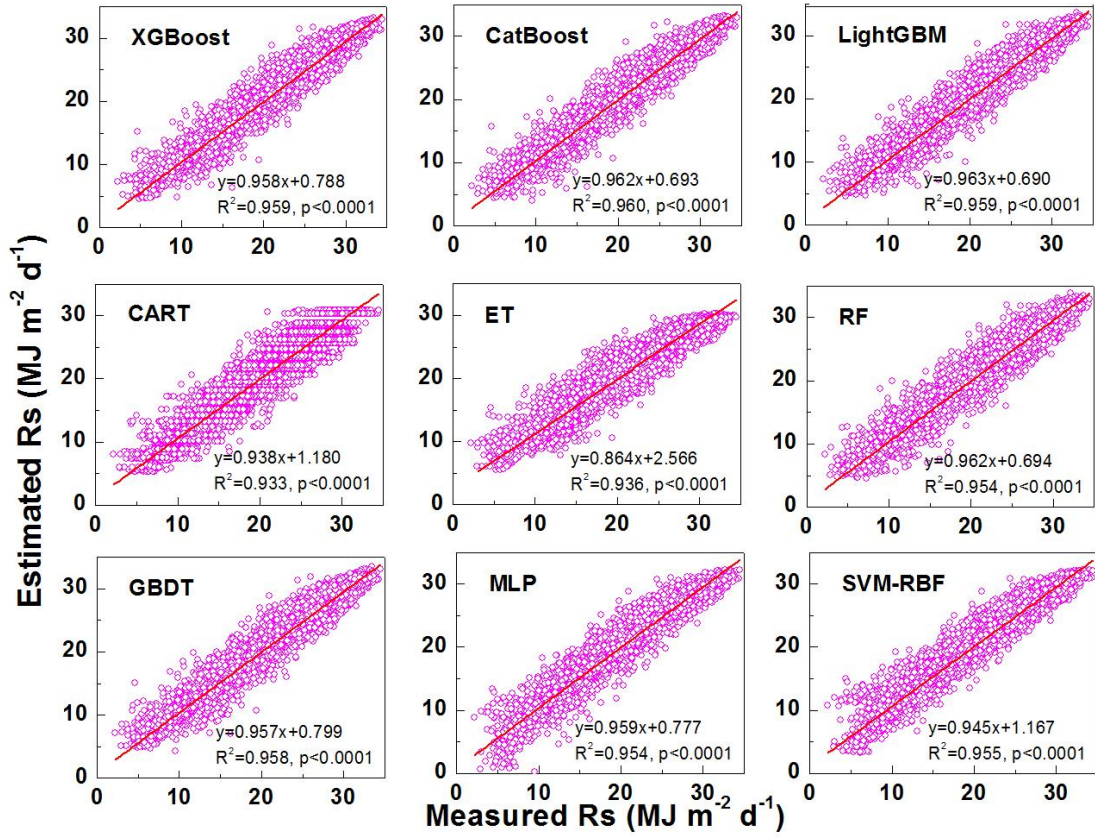

Figure S14. Same as Figure S1 but at Geermu station.



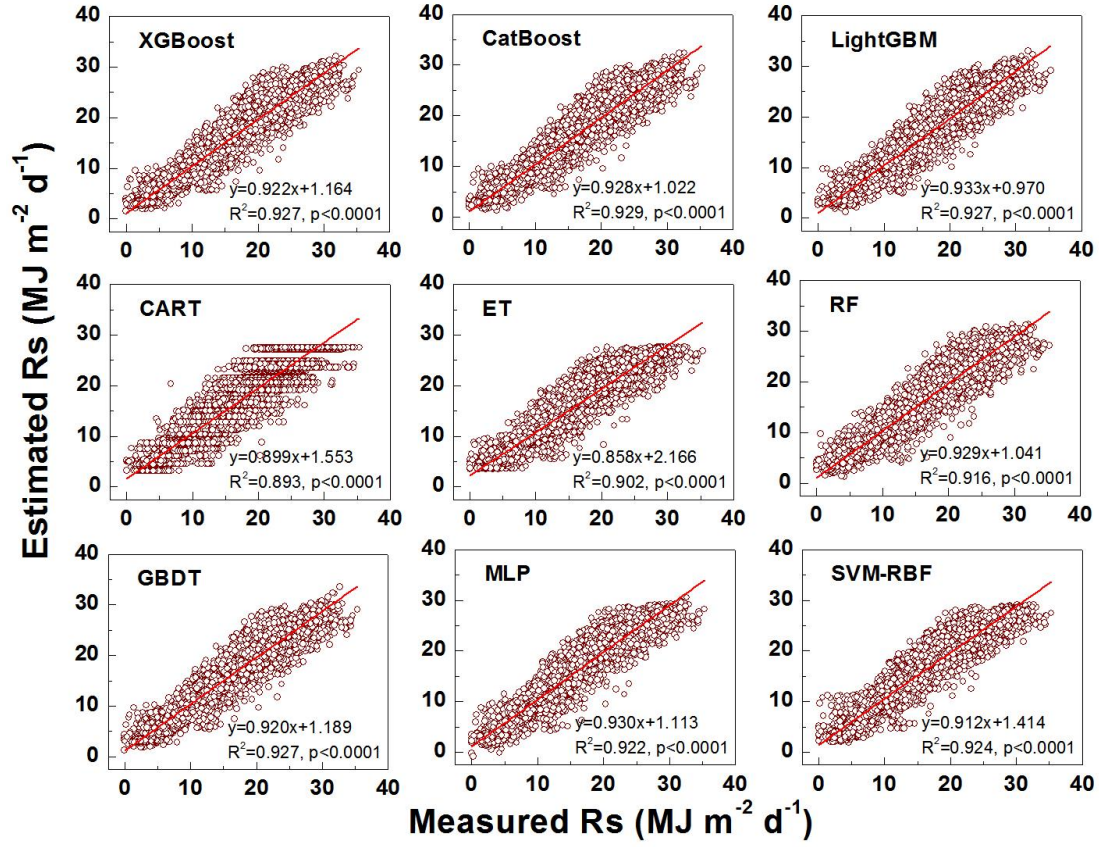

Figure S15. Same as Figure S1 but at Kashi station.

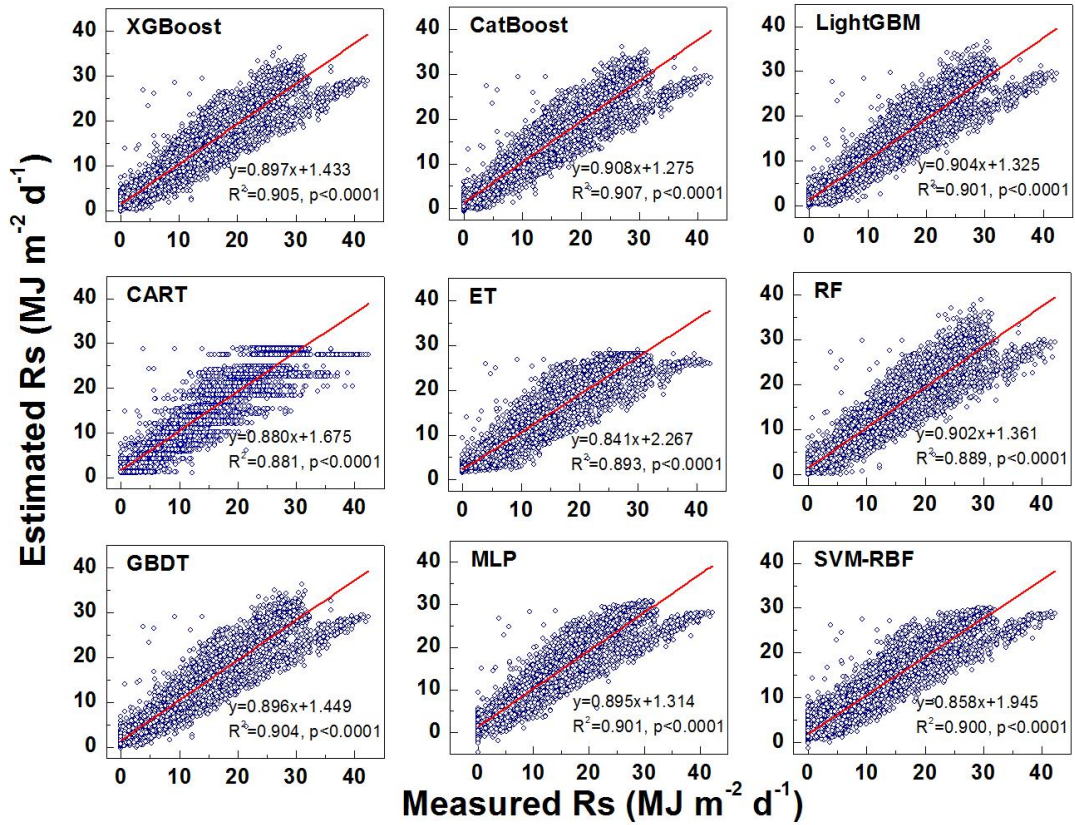

Figure S16. Same as Figure S1 but at Wulumuqi station.

**Table S1** Statistical values of the developed models (CART, ET, RF, GBDT, XGBoost, CatBoost, LightGBM, MLP and SVM) with various input combinations during training and testing stages at Sanya station.

| Input/Model                                                                                                                     | Training       |                                          |                                         |                                         | Testing        |                                          |                                         |                                         |
|---------------------------------------------------------------------------------------------------------------------------------|----------------|------------------------------------------|-----------------------------------------|-----------------------------------------|----------------|------------------------------------------|-----------------------------------------|-----------------------------------------|
|                                                                                                                                 | R <sup>2</sup> | RMSE(MJm <sup>-2</sup> d <sup>-1</sup> ) | MAE(MJm <sup>-2</sup> d <sup>-1</sup> ) | MBE(MJm <sup>-2</sup> d <sup>-1</sup> ) | R <sup>2</sup> | RMSE(MJm <sup>-2</sup> d <sup>-1</sup> ) | MAE(MJm <sup>-2</sup> d <sup>-1</sup> ) | MBE(MJm <sup>-2</sup> d <sup>-1</sup> ) |
| <b><i>R<sub>a</sub> n/N (C1)</i></b>                                                                                            |                |                                          |                                         |                                         |                |                                          |                                         |                                         |
| XGBoost1                                                                                                                        | 0.846          | 2.357                                    | 1.787                                   | 0.001                                   | 0.796          | 2.703                                    | 2.094                                   | -0.025                                  |
| Catboost1                                                                                                                       | 0.842          | 2.388                                    | 1.812                                   | 0.000                                   | 0.797          | 2.700                                    | 2.092                                   | -0.029                                  |
| LightGBM1                                                                                                                       | 0.862          | 2.231                                    | 1.690                                   | 0.000                                   | 0.789          | 2.753                                    | 2.127                                   | -0.034                                  |
| CART1                                                                                                                           | 0.830          | 2.475                                    | 1.899                                   | 0.000                                   | 0.782          | 2.797                                    | 2.184                                   | -0.024                                  |
| ET1                                                                                                                             | 0.828          | 2.493                                    | 1.928                                   | 0.000                                   | 0.788          | 2.759                                    | 2.172                                   | -0.042                                  |
| RF1                                                                                                                             | 0.962          | 1.167                                    | 0.823                                   | 0.002                                   | 0.738          | 3.070                                    | 2.354                                   | -0.014                                  |
| GBDT1                                                                                                                           | 0.847          | 2.350                                    | 1.784                                   | 0.000                                   | 0.796          | 2.706                                    | 2.094                                   | -0.027                                  |
| MLP1                                                                                                                            | 0.827          | 2.496                                    | 1.906                                   | 0.026                                   | 0.795          | 2.711                                    | 2.105                                   | 0.008                                   |
| SVM-RBF1                                                                                                                        | 0.823          | 2.525                                    | 1.916                                   | -0.023                                  | 0.787          | 2.764                                    | 2.139                                   | -0.048                                  |
| <b><i>R<sub>a</sub> n/N T<sub>max</sub> T<sub>min</sub> (C2)</i></b>                                                            |                |                                          |                                         |                                         |                |                                          |                                         |                                         |
| XGBoost2                                                                                                                        | 0.870          | 2.164                                    | 1.649                                   | 0.000                                   | 0.784          | 2.770                                    | 2.145                                   | 0.235                                   |
| Catboost2                                                                                                                       | 0.874          | 2.133                                    | 1.623                                   | 0.000                                   | 0.786          | 2.762                                    | 2.133                                   | 0.250                                   |
| LightGBM2                                                                                                                       | 0.903          | 1.868                                    | 1.425                                   | 0.000                                   | 0.781          | 2.789                                    | 2.154                                   | 0.266                                   |
| CART2                                                                                                                           | 0.837          | 2.423                                    | 1.866                                   | 0.000                                   | 0.770          | 2.870                                    | 2.230                                   | 0.046                                   |
| ET2                                                                                                                             | 0.829          | 2.481                                    | 1.935                                   | 0.000                                   | 0.782          | 2.801                                    | 2.212                                   | 0.043                                   |
| RF2                                                                                                                             | 0.971          | 1.024                                    | 0.721                                   | -0.001                                  | 0.757          | 2.946                                    | 2.266                                   | 0.248                                   |
| GBDT2                                                                                                                           | 0.871          | 2.159                                    | 1.646                                   | 0.000                                   | 0.786          | 2.761                                    | 2.134                                   | 0.231                                   |
| MLP2                                                                                                                            | 0.834          | 2.448                                    | 1.871                                   | 0.112                                   | 0.789          | 2.738                                    | 2.135                                   | 0.256                                   |
| SVM-RBF2                                                                                                                        | 0.834          | 2.449                                    | 1.849                                   | -0.079                                  | 0.784          | 2.778                                    | 2.151                                   | 0.078                                   |
| <b><i>R<sub>a</sub> n/N H<sub>0</sub> U<sub>10</sub> (C3)</i></b>                                                               |                |                                          |                                         |                                         |                |                                          |                                         |                                         |
| XGBoost3                                                                                                                        | 0.870          | 2.169                                    | 1.628                                   | 0.000                                   | 0.756          | 2.946                                    | 2.281                                   | 0.342                                   |
| Catboost3                                                                                                                       | 0.871          | 2.157                                    | 1.619                                   | 0.000                                   | 0.748          | 2.986                                    | 2.308                                   | 0.375                                   |
| LightGBM3                                                                                                                       | 0.902          | 1.879                                    | 1.422                                   | 0.000                                   | 0.739          | 3.046                                    | 2.350                                   | 0.335                                   |
| CART3                                                                                                                           | 0.839          | 2.410                                    | 1.847                                   | 0.000                                   | 0.757          | 2.950                                    | 2.277                                   | 0.157                                   |
| ET3                                                                                                                             | 0.834          | 2.449                                    | 1.891                                   | 0.000                                   | 0.787          | 2.763                                    | 2.168                                   | 0.078                                   |
| RF3                                                                                                                             | 0.970          | 1.045                                    | 0.732                                   | 0.000                                   | 0.727          | 3.127                                    | 2.398                                   | 0.321                                   |
| GBDT3                                                                                                                           | 0.870          | 2.164                                    | 1.627                                   | 0.000                                   | 0.755          | 2.949                                    | 2.280                                   | 0.342                                   |
| MLP3                                                                                                                            | 0.837          | 2.427                                    | 1.841                                   | 0.002                                   | 0.781          | 2.794                                    | 2.167                                   | 0.278                                   |
| SVM-RBF                                                                                                                         | 0.833          | 2.458                                    | 1.832                                   | -0.124                                  | 0.777          | 2.820                                    | 2.162                                   | 0.148                                   |
| <b><i>R<sub>a</sub> n/N P<sub>re</sub> P<sub>rs</sub> (C4)</i></b>                                                              |                |                                          |                                         |                                         |                |                                          |                                         |                                         |
| XGBoost4                                                                                                                        | 0.882          | 2.064                                    | 1.567                                   | 0.001                                   | 0.794          | 2.702                                    | 2.106                                   | 0.453                                   |
| Catboost4                                                                                                                       | 0.882          | 2.061                                    | 1.569                                   | 0.000                                   | 0.793          | 2.707                                    | 2.103                                   | 0.464                                   |
| LightGBM4                                                                                                                       | 0.911          | 1.797                                    | 1.378                                   | 0.000                                   | 0.789          | 2.734                                    | 2.122                                   | 0.471                                   |
| CART4                                                                                                                           | 0.848          | 2.346                                    | 1.807                                   | 0.000                                   | 0.772          | 2.861                                    | 2.216                                   | 0.184                                   |
| ET4                                                                                                                             | 0.844          | 2.374                                    | 1.830                                   | 0.000                                   | 0.797          | 2.700                                    | 2.124                                   | 0.121                                   |
| RF4                                                                                                                             | 0.973          | 0.993                                    | 0.701                                   | -0.013                                  | 0.770          | 2.865                                    | 2.222                                   | 0.437                                   |
| GBDT4                                                                                                                           | 0.883          | 2.059                                    | 1.564                                   | 0.000                                   | 0.794          | 2.703                                    | 2.106                                   | 0.449                                   |
| MLP4                                                                                                                            | 0.851          | 2.317                                    | 1.752                                   | 0.006                                   | 0.775          | 2.823                                    | 2.199                                   | 0.475                                   |
| SVM-RBF4                                                                                                                        | 0.852          | 2.313                                    | 1.740                                   | -0.080                                  | 0.783          | 2.774                                    | 2.158                                   | 0.398                                   |
| <b><i>R<sub>a</sub> n/N T<sub>max</sub> T<sub>min</sub> H<sub>0</sub> U<sub>10</sub> (C5)</i></b>                               |                |                                          |                                         |                                         |                |                                          |                                         |                                         |
| XGBoost5                                                                                                                        | 0.884          | 2.047                                    | 1.549                                   | 0.000                                   | 0.774          | 2.835                                    | 2.182                                   | 0.332                                   |
| Catboost5                                                                                                                       | 0.893          | 1.967                                    | 1.488                                   | 0.000                                   | 0.777          | 2.813                                    | 2.165                                   | 0.350                                   |
| LightGBM5                                                                                                                       | 0.924          | 1.655                                    | 1.271                                   | 0.000                                   | 0.776          | 2.821                                    | 2.172                                   | 0.321                                   |
| CART5                                                                                                                           | 0.841          | 2.395                                    | 1.837                                   | 0.000                                   | 0.755          | 2.963                                    | 2.292                                   | 0.203                                   |
| ET5                                                                                                                             | 0.837          | 2.427                                    | 1.878                                   | 0.000                                   | 0.779          | 2.813                                    | 2.207                                   | 0.110                                   |
| RF5                                                                                                                             | 0.974          | 0.971                                    | 0.683                                   | -0.006                                  | 0.762          | 2.914                                    | 2.237                                   | 0.315                                   |
| GBDT5                                                                                                                           | 0.884          | 2.044                                    | 1.547                                   | 0.000                                   | 0.772          | 2.845                                    | 2.192                                   | 0.339                                   |
| MLP5                                                                                                                            | 0.841          | 2.396                                    | 1.818                                   | 0.012                                   | 0.780          | 2.796                                    | 2.166                                   | 0.310                                   |
| SVM-RBF5                                                                                                                        | 0.838          | 2.417                                    | 1.800                                   | -0.129                                  | 0.787          | 2.760                                    | 2.113                                   | 0.131                                   |
| <b><i>R<sub>a</sub> n/N T<sub>max</sub> T<sub>min</sub> P<sub>re</sub> P<sub>rs</sub> (C6)</i></b>                              |                |                                          |                                         |                                         |                |                                          |                                         |                                         |
| XGBoost6                                                                                                                        | 0.896          | 1.941                                    | 1.485                                   | 0.000                                   | 0.805          | 2.623                                    | 2.045                                   | 0.455                                   |
| Catboost6                                                                                                                       | 0.901          | 1.891                                    | 1.449                                   | 0.000                                   | 0.814          | 2.569                                    | 2.002                                   | 0.447                                   |
| LightGBM6                                                                                                                       | 0.930          | 1.595                                    | 1.233                                   | 0.000                                   | 0.814          | 2.571                                    | 2.000                                   | 0.443                                   |
| CART6                                                                                                                           | 0.850          | 2.327                                    | 1.797                                   | 0.000                                   | 0.768          | 2.883                                    | 2.242                                   | 0.218                                   |
| ET6                                                                                                                             | 0.849          | 2.330                                    | 1.809                                   | 0.000                                   | 0.793          | 2.729                                    | 2.146                                   | 0.186                                   |
| RF6                                                                                                                             | 0.977          | 0.920                                    | 0.653                                   | 0.002                                   | 0.791          | 2.727                                    | 2.125                                   | 0.436                                   |
| GBDT6                                                                                                                           | 0.896          | 1.933                                    | 1.480                                   | 0.000                                   | 0.806          | 2.622                                    | 2.043                                   | 0.454                                   |
| MLP6                                                                                                                            | 0.851          | 2.313                                    | 1.765                                   | 0.094                                   | 0.792          | 2.723                                    | 2.118                                   | 0.502                                   |
| SVM-RBF6                                                                                                                        | 0.858          | 2.260                                    | 1.709                                   | -0.068                                  | 0.798          | 2.680                                    | 2.095                                   | 0.365                                   |
| <b><i>R<sub>a</sub> n/N T<sub>max</sub> T<sub>min</sub> H<sub>0</sub> U<sub>10</sub> P<sub>re</sub> P<sub>rs</sub> (C7)</i></b> |                |                                          |                                         |                                         |                |                                          |                                         |                                         |
| XGBoost7                                                                                                                        | 0.899          | 1.906                                    | 1.455                                   | 0.000                                   | 0.801          | 2.662                                    | 2.069                                   | 0.344                                   |
| Catboost7                                                                                                                       | 0.907          | 1.830                                    | 1.399                                   | 0.000                                   | 0.808          | 2.619                                    | 2.033                                   | 0.355                                   |
| LightGBM7                                                                                                                       | 0.937          | 1.507                                    | 1.168                                   | 0.000                                   | 0.810          | 2.604                                    | 2.025                                   | 0.346                                   |
| CART7                                                                                                                           | 0.851          | 2.322                                    | 1.794                                   | 0.000                                   | 0.764          | 2.913                                    | 2.260                                   | 0.190                                   |
| ET7                                                                                                                             | 0.845          | 2.363                                    | 1.835                                   | 0.000                                   | 0.788          | 2.754                                    | 2.164                                   | 0.191                                   |
| RF7                                                                                                                             | 0.977          | 0.911                                    | 0.651                                   | -0.002                                  | 0.781          | 2.793                                    | 2.165                                   | 0.353                                   |
| GBDT7                                                                                                                           | 0.900          | 1.903                                    | 1.454                                   | 0.000                                   | 0.800          | 2.669                                    | 2.074                                   | 0.336                                   |
| MLP7                                                                                                                            | 0.853          | 2.302                                    | 1.754                                   | 0.067                                   | 0.790          | 2.735                                    | 2.121                                   | 0.480                                   |
| SVM-RBF7                                                                                                                        | 0.856          | 2.276                                    | 1.721                                   | -0.081                                  | 0.793          | 2.716                                    | 2.127                                   | 0.289                                   |



**Table S2** Same as Table S4 but at Guangzhou station.

| Input/Model                                                                                                                                                       | Training       |                                          |                                         |                                         | Testing        |                                          |                                         |                                         |
|-------------------------------------------------------------------------------------------------------------------------------------------------------------------|----------------|------------------------------------------|-----------------------------------------|-----------------------------------------|----------------|------------------------------------------|-----------------------------------------|-----------------------------------------|
|                                                                                                                                                                   | R <sup>2</sup> | RMSE(MJm <sup>-2</sup> d <sup>-1</sup> ) | MAE(MJm <sup>-2</sup> d <sup>-1</sup> ) | MBE(MJm <sup>-2</sup> d <sup>-1</sup> ) | R <sup>2</sup> | RMSE(MJm <sup>-2</sup> d <sup>-1</sup> ) | MAE(MJm <sup>-2</sup> d <sup>-1</sup> ) | MBE(MJm <sup>-2</sup> d <sup>-1</sup> ) |
| <b><math>R_a</math> <math>n/N</math> (C1)</b>                                                                                                                     |                |                                          |                                         |                                         |                |                                          |                                         |                                         |
| XGBoost1                                                                                                                                                          | 0.899          | 1.890                                    | 1.483                                   | 0.000                                   | 0.875          | 2.054                                    | 1.635                                   | -0.030                                  |
| Catboost1                                                                                                                                                         | 0.895          | 1.924                                    | 1.510                                   | 0.000                                   | 0.876          | 2.045                                    | 1.628                                   | -0.033                                  |
| LightGBM1                                                                                                                                                         | 0.907          | 1.810                                    | 1.415                                   | 0.000                                   | 0.871          | 2.093                                    | 1.666                                   | -0.027                                  |
| CART1                                                                                                                                                             | 0.883          | 2.036                                    | 1.610                                   | 0.000                                   | 0.860          | 2.182                                    | 1.744                                   | -0.026                                  |
| ET1                                                                                                                                                               | 0.882          | 2.043                                    | 1.628                                   | 0.000                                   | 0.865          | 2.136                                    | 1.709                                   | -0.035                                  |
| RF1                                                                                                                                                               | 0.974          | 0.956                                    | 0.692                                   | 0.000                                   | 0.830          | 2.404                                    | 1.892                                   | -0.025                                  |
| GBDT1                                                                                                                                                             | 0.900          | 1.883                                    | 1.478                                   | 0.000                                   | 0.875          | 2.054                                    | 1.636                                   | -0.030                                  |
| MLP1                                                                                                                                                              | 0.885          | 2.016                                    | 1.592                                   | 0.050                                   | 0.869          | 2.108                                    | 1.684                                   | 0.022                                   |
| SVM-RBF1                                                                                                                                                          | 0.870          | 2.145                                    | 1.689                                   | -0.091                                  | 0.855          | 2.213                                    | 1.767                                   | -0.120                                  |
| <b><math>R_a</math> <math>n/N</math> <math>T_{max}</math> <math>T_{min}</math> (C2)</b>                                                                           |                |                                          |                                         |                                         |                |                                          |                                         |                                         |
| XGBoost2                                                                                                                                                          | 0.918          | 1.707                                    | 1.335                                   | 0.000                                   | 0.892          | 1.909                                    | 1.516                                   | -0.020                                  |
| Catboost2                                                                                                                                                         | 0.921          | 1.669                                    | 1.298                                   | 0.000                                   | 0.897          | 1.868                                    | 1.477                                   | -0.015                                  |
| LightGBM2                                                                                                                                                         | 0.938          | 1.477                                    | 1.148                                   | 0.000                                   | 0.893          | 1.902                                    | 1.504                                   | -0.026                                  |
| CART2                                                                                                                                                             | 0.890          | 1.973                                    | 1.561                                   | 0.000                                   | 0.866          | 2.135                                    | 1.704                                   | -0.030                                  |
| ET2                                                                                                                                                               | 0.887          | 1.998                                    | 1.588                                   | 0.000                                   | 0.871          | 2.092                                    | 1.672                                   | -0.037                                  |
| RF2                                                                                                                                                               | 0.981          | 0.809                                    | 0.584                                   | 0.001                                   | 0.876          | 2.052                                    | 1.618                                   | -0.010                                  |
| GBDT2                                                                                                                                                             | 0.918          | 1.704                                    | 1.333                                   | 0.000                                   | 0.892          | 1.909                                    | 1.516                                   | -0.019                                  |
| MLP2                                                                                                                                                              | 0.901          | 1.867                                    | 1.457                                   | 0.043                                   | 0.892          | 1.916                                    | 1.507                                   | 0.014                                   |
| SVM-RBF2                                                                                                                                                          | 0.892          | 1.958                                    | 1.529                                   | -0.065                                  | 0.878          | 2.030                                    | 1.606                                   | -0.096                                  |
| <b><math>R_a</math> <math>n/N</math> <math>H_0</math> <math>U_0</math> (C3)</b>                                                                                   |                |                                          |                                         |                                         |                |                                          |                                         |                                         |
| XGBoost3                                                                                                                                                          | 0.919          | 1.697                                    | 1.318                                   | 0.000                                   | 0.885          | 1.978                                    | 1.588                                   | 0.072                                   |
| Catboost3                                                                                                                                                         | 0.917          | 1.709                                    | 1.326                                   | 0.000                                   | 0.885          | 1.977                                    | 1.587                                   | 0.098                                   |
| LightGBM3                                                                                                                                                         | 0.936          | 1.506                                    | 1.164                                   | 0.000                                   | 0.882          | 2.000                                    | 1.596                                   | 0.093                                   |
| CART3                                                                                                                                                             | 0.892          | 1.954                                    | 1.541                                   | 0.000                                   | 0.864          | 2.151                                    | 1.716                                   | -0.003                                  |
| ET3                                                                                                                                                               | 0.889          | 1.984                                    | 1.579                                   | 0.000                                   | 0.871          | 2.092                                    | 1.677                                   | -0.009                                  |
| RF3                                                                                                                                                               | 0.981          | 0.809                                    | 0.587                                   | -0.001                                  | 0.864          | 2.149                                    | 1.714                                   | 0.069                                   |
| GBDT3                                                                                                                                                             | 0.919          | 1.694                                    | 1.317                                   | 0.000                                   | 0.884          | 1.987                                    | 1.595                                   | 0.089                                   |
| MLP3                                                                                                                                                              | 0.903          | 1.850                                    | 1.447                                   | -0.004                                  | 0.879          | 2.027                                    | 1.627                                   | 0.108                                   |
| SVM-RBF                                                                                                                                                           | 0.889          | 1.978                                    | 1.555                                   | -0.084                                  | 0.866          | 2.134                                    | 1.713                                   | 0.011                                   |
| <b><math>R_a</math> <math>n/N</math> <math>P_{re}</math> <math>P_{rs}</math> (C4)</b>                                                                             |                |                                          |                                         |                                         |                |                                          |                                         |                                         |
| XGBoost4                                                                                                                                                          | 0.918          | 1.705                                    | 1.350                                   | 0.000                                   | 0.889          | 1.932                                    | 1.554                                   | -0.006                                  |
| Catboost4                                                                                                                                                         | 0.917          | 1.711                                    | 1.354                                   | 0.000                                   | 0.890          | 1.924                                    | 1.547                                   | 0.001                                   |
| LightGBM4                                                                                                                                                         | 0.935          | 1.512                                    | 1.196                                   | 0.000                                   | 0.885          | 1.970                                    | 1.579                                   | -0.009                                  |
| CART4                                                                                                                                                             | 0.893          | 1.944                                    | 1.539                                   | 0.000                                   | 0.867          | 2.122                                    | 1.694                                   | -0.012                                  |
| ET4                                                                                                                                                               | 0.886          | 2.010                                    | 1.594                                   | 0.000                                   | 0.867          | 2.121                                    | 1.696                                   | -0.024                                  |
| RF4                                                                                                                                                               | 0.981          | 0.816                                    | 0.598                                   | -0.003                                  | 0.868          | 2.115                                    | 1.681                                   | -0.010                                  |
| GBDT4                                                                                                                                                             | 0.918          | 1.702                                    | 1.349                                   | 0.000                                   | 0.889          | 1.935                                    | 1.557                                   | -0.004                                  |
| MLP4                                                                                                                                                              | 0.894          | 1.933                                    | 1.527                                   | 0.008                                   | 0.875          | 2.052                                    | 1.640                                   | 0.014                                   |
| SVM-RBF4                                                                                                                                                          | 0.877          | 2.081                                    | 1.644                                   | -0.059                                  | 0.861          | 2.171                                    | 1.742                                   | -0.059                                  |
| <b><math>R_a</math> <math>n/N</math> <math>T_{max}</math> <math>T_{min}</math> <math>H_0</math> <math>U_0</math> (C5)</b>                                         |                |                                          |                                         |                                         |                |                                          |                                         |                                         |
| XGBoost5                                                                                                                                                          | 0.931          | 1.565                                    | 1.215                                   | 0.000                                   | 0.898          | 1.856                                    | 1.480                                   | 0.075                                   |
| Catboost5                                                                                                                                                         | 0.935          | 1.521                                    | 1.174                                   | 0.000                                   | 0.903          | 1.820                                    | 1.453                                   | 0.115                                   |
| LightGBM5                                                                                                                                                         | 0.953          | 1.283                                    | 0.992                                   | 0.000                                   | 0.903          | 1.814                                    | 1.437                                   | 0.089                                   |
| CART5                                                                                                                                                             | 0.895          | 1.924                                    | 1.517                                   | 0.000                                   | 0.867          | 2.124                                    | 1.692                                   | -0.012                                  |
| ET5                                                                                                                                                               | 0.892          | 1.952                                    | 1.549                                   | 0.000                                   | 0.871          | 2.090                                    | 1.669                                   | 0.012                                   |
| RF5                                                                                                                                                               | 0.984          | 0.742                                    | 0.537                                   | -0.001                                  | 0.888          | 1.955                                    | 1.553                                   | 0.079                                   |
| GBDT5                                                                                                                                                             | 0.931          | 1.562                                    | 1.213                                   | 0.000                                   | 0.899          | 1.852                                    | 1.477                                   | 0.072                                   |
| MLP5                                                                                                                                                              | 0.918          | 1.699                                    | 1.313                                   | -0.076                                  | 0.895          | 1.882                                    | 1.482                                   | 0.018                                   |
| SVM-RBF5                                                                                                                                                          | 0.907          | 1.814                                    | 1.403                                   | -0.086                                  | 0.888          | 1.950                                    | 1.543                                   | -0.002                                  |
| <b><math>R_a</math> <math>n/N</math> <math>T_{max}</math> <math>T_{min}</math> <math>P_{re}</math> <math>P_{rs}</math> (C6)</b>                                   |                |                                          |                                         |                                         |                |                                          |                                         |                                         |
| XGBoost6                                                                                                                                                          | 0.933          | 1.543                                    | 1.218                                   | 0.000                                   | 0.904          | 1.804                                    | 1.449                                   | 0.013                                   |
| Catboost6                                                                                                                                                         | 0.938          | 1.479                                    | 1.159                                   | 0.000                                   | 0.910          | 1.749                                    | 1.401                                   | 0.037                                   |
| LightGBM6                                                                                                                                                         | 0.955          | 1.260                                    | 0.986                                   | 0.000                                   | 0.906          | 1.782                                    | 1.420                                   | 0.024                                   |
| CART6                                                                                                                                                             | 0.896          | 1.913                                    | 1.512                                   | 0.000                                   | 0.869          | 2.111                                    | 1.682                                   | -0.012                                  |
| ET6                                                                                                                                                               | 0.891          | 1.967                                    | 1.559                                   | 0.000                                   | 0.873          | 2.078                                    | 1.656                                   | -0.034                                  |
| RF6                                                                                                                                                               | 0.985          | 0.735                                    | 0.531                                   | 0.000                                   | 0.894          | 1.893                                    | 1.501                                   | -0.008                                  |
| GBDT6                                                                                                                                                             | 0.933          | 1.537                                    | 1.213                                   | 0.000                                   | 0.904          | 1.805                                    | 1.449                                   | 0.011                                   |
| MLP6                                                                                                                                                              | 0.911          | 1.771                                    | 1.384                                   | -0.041                                  | 0.894          | 1.896                                    | 1.494                                   | -0.003                                  |
| SVM-RBF6                                                                                                                                                          | 0.896          | 1.913                                    | 1.505                                   | -0.044                                  | 0.877          | 2.040                                    | 1.627                                   | 0.000                                   |
| <b><math>R_a</math> <math>n/N</math> <math>T_{max}</math> <math>T_{min}</math> <math>H_0</math> <math>U_0</math> <math>P_{re}</math> <math>P_{rs}</math> (C7)</b> |                |                                          |                                         |                                         |                |                                          |                                         |                                         |
| XGBoost7                                                                                                                                                          | 0.938          | 1.486                                    | 1.163                                   | 0.000                                   | 0.904          | 1.804                                    | 1.443                                   | 0.079                                   |
| Catboost7                                                                                                                                                         | 0.943          | 1.424                                    | 1.107                                   | 0.000                                   | 0.912          | 1.734                                    | 1.385                                   | 0.096                                   |
| LightGBM7                                                                                                                                                         | 0.961          | 1.170                                    | 0.912                                   | 0.000                                   | 0.911          | 1.740                                    | 1.381                                   | 0.061                                   |
| CART7                                                                                                                                                             | 0.897          | 1.909                                    | 1.508                                   | 0.000                                   | 0.867          | 2.123                                    | 1.692                                   | -0.005                                  |
| ET7                                                                                                                                                               | 0.890          | 1.969                                    | 1.563                                   | 0.000                                   | 0.872          | 2.082                                    | 1.666                                   | -0.012                                  |
| RF7                                                                                                                                                               | 0.986          | 0.704                                    | 0.514                                   | -0.003                                  | 0.898          | 1.858                                    | 1.477                                   | 0.043                                   |
| GBDT7                                                                                                                                                             | 0.938          | 1.485                                    | 1.163                                   | 0.000                                   | 0.904          | 1.808                                    | 1.448                                   | 0.073                                   |
| MLP7                                                                                                                                                              | 0.923          | 1.653                                    | 1.275                                   | -0.057                                  | 0.901          | 1.837                                    | 1.445                                   | 0.018                                   |
| SVM-RBF7                                                                                                                                                          | 0.908          | 1.803                                    | 1.408                                   | -0.038                                  | 0.888          | 1.952                                    | 1.555                                   | 0.057                                   |

**Table S3** Same as Table S4 but at Kunming station.

| Input/Model                                                                                                                    | Training       |                                          |                                         |                                         | Testing        |                                          |                                         |                                         |
|--------------------------------------------------------------------------------------------------------------------------------|----------------|------------------------------------------|-----------------------------------------|-----------------------------------------|----------------|------------------------------------------|-----------------------------------------|-----------------------------------------|
|                                                                                                                                | R <sup>2</sup> | RMSE(MJm <sup>-2</sup> d <sup>-1</sup> ) | MAE(MJm <sup>-2</sup> d <sup>-1</sup> ) | MBE(MJm <sup>-2</sup> d <sup>-1</sup> ) | R <sup>2</sup> | RMSE(MJm <sup>-2</sup> d <sup>-1</sup> ) | MAE(MJm <sup>-2</sup> d <sup>-1</sup> ) | MBE(MJm <sup>-2</sup> d <sup>-1</sup> ) |
| <b><i>R<sub>e</sub> n/N (C1)</i></b>                                                                                           |                |                                          |                                         |                                         |                |                                          |                                         |                                         |
| XGBoost1                                                                                                                       | 0.908          | 1.991                                    | 1.446                                   | 0.001                                   | <b>0.890</b>   | <b>2.159</b>                             | <b>1.570</b>                            | -0.050                                  |
| Catboost1                                                                                                                      | 0.903          | 2.040                                    | 1.477                                   | 0.000                                   | <b>0.891</b>   | <b>2.142</b>                             | <b>1.556</b>                            | -0.058                                  |
| LightGBM1                                                                                                                      | <b>0.916</b>   | <b>1.898</b>                             | <b>1.383</b>                            | 0.000                                   | 0.887          | 2.188                                    | 1.599                                   | -0.051                                  |
| CART1                                                                                                                          | 0.883          | 2.238                                    | 1.675                                   | 0.000                                   | 0.865          | 2.392                                    | 1.796                                   | -0.041                                  |
| ET1                                                                                                                            | 0.884          | 2.233                                    | 1.672                                   | 0.000                                   | 0.876          | 2.296                                    | 1.711                                   | -0.037                                  |
| RF1                                                                                                                            | <b>0.977</b>   | <b>0.993</b>                             | <b>0.683</b>                            | 0.000                                   | 0.857          | 2.463                                    | 1.821                                   | -0.033                                  |
| GBDT1                                                                                                                          | <b>0.909</b>   | <b>1.979</b>                             | <b>1.439</b>                            | 0.000                                   | <b>0.889</b>   | <b>2.161</b>                             | <b>1.572</b>                            | -0.053                                  |
| MLP1                                                                                                                           | 0.894          | 2.137                                    | 1.561                                   | -0.002                                  | 0.888          | 2.177                                    | 1.585                                   | -0.042                                  |
| SVM-RBF1                                                                                                                       | 0.887          | 2.203                                    | 1.603                                   | -0.045                                  | 0.883          | 2.229                                    | 1.626                                   | -0.083                                  |
| <b><i>R<sub>e</sub> n/N T<sub>max</sub> T<sub>min</sub> (C2)</i></b>                                                           |                |                                          |                                         |                                         |                |                                          |                                         |                                         |
| XGBoost2                                                                                                                       | 0.918          | 1.875                                    | 1.377                                   | 0.001                                   | <b>0.898</b>   | <b>2.079</b>                             | <b>1.531</b>                            | -0.044                                  |
| Catboost2                                                                                                                      | 0.918          | 1.875                                    | 1.372                                   | 0.000                                   | <b>0.900</b>   | <b>2.054</b>                             | <b>1.512</b>                            | -0.032                                  |
| LightGBM2                                                                                                                      | <b>0.937</b>   | <b>1.650</b>                             | <b>1.214</b>                            | 0.000                                   | 0.897          | 2.087                                    | 1.541                                   | -0.038                                  |
| CART2                                                                                                                          | 0.889          | 2.186                                    | 1.652                                   | 0.000                                   | 0.868          | 2.364                                    | 1.784                                   | -0.021                                  |
| ET2                                                                                                                            | 0.889          | 2.178                                    | 1.639                                   | 0.000                                   | 0.883          | 2.232                                    | 1.678                                   | -0.063                                  |
| RF2                                                                                                                            | <b>0.981</b>   | <b>0.899</b>                             | <b>0.622</b>                            | 0.005                                   | 0.884          | 2.217                                    | 1.645                                   | -0.039                                  |
| GBDT2                                                                                                                          | <b>0.919</b>   | <b>1.864</b>                             | <b>1.372</b>                            | 0.000                                   | <b>0.898</b>   | <b>2.074</b>                             | <b>1.526</b>                            | -0.042                                  |
| MLP2                                                                                                                           | 0.901          | 2.066                                    | 1.524                                   | 0.009                                   | 0.895          | 2.105                                    | 1.557                                   | -0.022                                  |
| SVM-RBF2                                                                                                                       | 0.898          | 2.091                                    | 1.531                                   | -0.015                                  | 0.894          | 2.125                                    | 1.564                                   | -0.049                                  |
| <b><i>R<sub>e</sub> n/N H<sub>0</sub> U<sub>0</sub> (C3)</i></b>                                                               |                |                                          |                                         |                                         |                |                                          |                                         |                                         |
| XGBoost3                                                                                                                       | 0.915          | 1.912                                    | 1.398                                   | 0.001                                   | <b>0.893</b>   | <b>2.128</b>                             | <b>1.558</b>                            | -0.031                                  |
| Catboost3                                                                                                                      | 0.913          | 1.931                                    | 1.405                                   | 0.000                                   | <b>0.894</b>   | <b>2.116</b>                             | <b>1.548</b>                            | -0.024                                  |
| LightGBM3                                                                                                                      | <b>0.933</b>   | <b>1.695</b>                             | <b>1.246</b>                            | 0.000                                   | 0.889          | 2.167                                    | 1.588                                   | -0.032                                  |
| CART3                                                                                                                          | 0.885          | 2.221                                    | 1.666                                   | 0.000                                   | 0.865          | 2.386                                    | 1.795                                   | -0.032                                  |
| ET3                                                                                                                            | 0.886          | 2.211                                    | 1.666                                   | 0.000                                   | 0.877          | 2.281                                    | 1.705                                   | -0.043                                  |
| RF3                                                                                                                            | <b>0.980</b>   | <b>0.930</b>                             | <b>0.638</b>                            | 0.001                                   | 0.873          | 2.318                                    | 1.708                                   | -0.039                                  |
| GBDT3                                                                                                                          | <b>0.915</b>   | <b>1.905</b>                             | <b>1.394</b>                            | 0.000                                   | <b>0.893</b>   | <b>2.127</b>                             | <b>1.556</b>                            | -0.035                                  |
| MLP3                                                                                                                           | 0.897          | 2.097                                    | 1.534                                   | 0.087                                   | 0.890          | 2.158                                    | 1.579                                   | 0.043                                   |
| SVM-RBF                                                                                                                        | 0.890          | 2.173                                    | 1.583                                   | -0.030                                  | 0.884          | 2.219                                    | 1.624                                   | -0.075                                  |
| <b><i>R<sub>e</sub> n/N P<sub>re</sub> P<sub>rs</sub> (C4)</i></b>                                                             |                |                                          |                                         |                                         |                |                                          |                                         |                                         |
| XGBoost4                                                                                                                       | 0.913          | 1.934                                    | 1.406                                   | 0.000                                   | <b>0.893</b>   | <b>2.128</b>                             | <b>1.546</b>                            | -0.052                                  |
| Catboost4                                                                                                                      | 0.912          | 1.945                                    | 1.414                                   | 0.000                                   | <b>0.894</b>   | <b>2.109</b>                             | <b>1.534</b>                            | -0.059                                  |
| LightGBM4                                                                                                                      | <b>0.932</b>   | <b>1.711</b>                             | <b>1.259</b>                            | 0.000                                   | 0.890          | 2.154                                    | 1.568                                   | -0.060                                  |
| CART4                                                                                                                          | 0.884          | 2.228                                    | 1.671                                   | 0.000                                   | 0.864          | 2.396                                    | 1.799                                   | -0.044                                  |
| ET4                                                                                                                            | 0.885          | 2.225                                    | 1.664                                   | 0.000                                   | 0.879          | 2.265                                    | 1.691                                   | -0.036                                  |
| RF4                                                                                                                            | <b>0.979</b>   | <b>0.938</b>                             | <b>0.646</b>                            | -0.008                                  | 0.875          | 2.302                                    | 1.706                                   | -0.090                                  |
| GBDT4                                                                                                                          | <b>0.914</b>   | <b>1.924</b>                             | <b>1.402</b>                            | 0.000                                   | <b>0.892</b>   | <b>2.139</b>                             | <b>1.555</b>                            | -0.060                                  |
| MLP4                                                                                                                           | 0.895          | 2.126                                    | 1.554                                   | -0.036                                  | 0.890          | 2.158                                    | 1.577                                   | -0.077                                  |
| SVM-RBF4                                                                                                                       | 0.889          | 2.181                                    | 1.588                                   | -0.023                                  | 0.885          | 2.209                                    | 1.610                                   | -0.060                                  |
| <b><i>R<sub>e</sub> n/N T<sub>max</sub> T<sub>min</sub> H<sub>0</sub> U<sub>0</sub> (C5)</i></b>                               |                |                                          |                                         |                                         |                |                                          |                                         |                                         |
| XGBoost5                                                                                                                       | 0.923          | 1.823                                    | 1.346                                   | 0.000                                   | <b>0.900</b>   | <b>2.061</b>                             | <b>1.524</b>                            | -0.025                                  |
| Catboost5                                                                                                                      | <b>0.924</b>   | <b>1.801</b>                             | <b>1.326</b>                            | 0.000                                   | <b>0.901</b>   | <b>2.049</b>                             | <b>1.522</b>                            | -0.008                                  |
| LightGBM5                                                                                                                      | <b>0.945</b>   | <b>1.531</b>                             | <b>1.134</b>                            | 0.000                                   | 0.899          | 2.072                                    | 1.536                                   | -0.016                                  |
| CART5                                                                                                                          | 0.889          | 2.177                                    | 1.651                                   | 0.000                                   | 0.867          | 2.374                                    | 1.794                                   | -0.014                                  |
| ET5                                                                                                                            | 0.893          | 2.145                                    | 1.606                                   | 0.000                                   | 0.884          | 2.220                                    | 1.663                                   | -0.032                                  |
| RF5                                                                                                                            | <b>0.982</b>   | <b>0.877</b>                             | <b>0.602</b>                            | -0.001                                  | 0.888          | 2.174                                    | 1.617                                   | -0.046                                  |
| GBDT5                                                                                                                          | 0.923          | 1.814                                    | 1.341                                   | 0.000                                   | <b>0.900</b>   | <b>2.062</b>                             | <b>1.526</b>                            | -0.032                                  |
| MLP5                                                                                                                           | 0.903          | 2.043                                    | 1.512                                   | -0.069                                  | 0.894          | 2.122                                    | 1.571                                   | -0.122                                  |
| SVM-RBF5                                                                                                                       | 0.898          | 2.095                                    | 1.538                                   | -0.018                                  | 0.892          | 2.145                                    | 1.587                                   | -0.051                                  |
| <b><i>R<sub>e</sub> n/N T<sub>max</sub> T<sub>min</sub> P<sub>re</sub> P<sub>rs</sub> (C6)</i></b>                             |                |                                          |                                         |                                         |                |                                          |                                         |                                         |
| XGBoost6                                                                                                                       | 0.922          | 1.828                                    | 1.346                                   | 0.000                                   | 0.901          | 2.049                                    | 1.515                                   | -0.050                                  |
| Catboost6                                                                                                                      | <b>0.924</b>   | <b>1.800</b>                             | <b>1.323</b>                            | 0.000                                   | <b>0.904</b>   | <b>2.017</b>                             | <b>1.494</b>                            | -0.033                                  |
| LightGBM6                                                                                                                      | <b>0.945</b>   | <b>1.539</b>                             | <b>1.140</b>                            | 0.000                                   | <b>0.902</b>   | <b>2.039</b>                             | <b>1.508</b>                            | -0.037                                  |
| CART6                                                                                                                          | 0.889          | 2.180                                    | 1.651                                   | 0.000                                   | 0.868          | 2.363                                    | 1.786                                   | -0.022                                  |
| ET6                                                                                                                            | 0.888          | 2.189                                    | 1.653                                   | 0.000                                   | 0.882          | 2.238                                    | 1.684                                   | -0.053                                  |
| RF6                                                                                                                            | <b>0.982</b>   | <b>0.878</b>                             | <b>0.605</b>                            | -0.001                                  | 0.888          | 2.177                                    | 1.621                                   | -0.067                                  |
| GBDT6                                                                                                                          | 0.923          | 1.820                                    | 1.343                                   | 0.000                                   | <b>0.901</b>   | <b>2.043</b>                             | <b>1.507</b>                            | -0.045                                  |
| MLP6                                                                                                                           | 0.903          | 2.039                                    | 1.501                                   | -0.009                                  | 0.896          | 2.097                                    | 1.545                                   | -0.039                                  |
| SVM-RBF6                                                                                                                       | 0.897          | 2.098                                    | 1.541                                   | -0.008                                  | 0.892          | 2.136                                    | 1.575                                   | -0.043                                  |
| <b><i>R<sub>e</sub> n/N T<sub>max</sub> T<sub>min</sub> H<sub>0</sub> U<sub>0</sub> P<sub>re</sub> P<sub>rs</sub> (C7)</i></b> |                |                                          |                                         |                                         |                |                                          |                                         |                                         |
| XGBoost7                                                                                                                       | 0.924          | 1.802                                    | 1.330                                   | 0.000                                   | 0.901          | 2.044                                    | 1.511                                   | -0.037                                  |
| Catboost7                                                                                                                      | <b>0.928</b>   | <b>1.762</b>                             | <b>1.298</b>                            | 0.000                                   | <b>0.904</b>   | <b>2.019</b>                             | <b>1.500</b>                            | -0.033                                  |
| LightGBM7                                                                                                                      | <b>0.950</b>   | <b>1.465</b>                             | <b>1.089</b>                            | 0.000                                   | <b>0.903</b>   | <b>2.030</b>                             | <b>1.501</b>                            | -0.026                                  |
| CART7                                                                                                                          | 0.890          | 2.175                                    | 1.652                                   | 0.000                                   | 0.868          | 2.362                                    | 1.788                                   | -0.020                                  |
| ET7                                                                                                                            | 0.892          | 2.154                                    | 1.619                                   | 0.000                                   | 0.886          | 2.197                                    | 1.651                                   | -0.032                                  |
| RF7                                                                                                                            | <b>0.983</b>   | <b>0.865</b>                             | <b>0.598</b>                            | -0.008                                  | 0.891          | 2.146                                    | 1.601                                   | -0.056                                  |
| GBDT7                                                                                                                          | 0.925          | 1.794                                    | 1.327                                   | 0.000                                   | <b>0.902</b>   | <b>2.041</b>                             | <b>1.510</b>                            | -0.034                                  |
| MLP7                                                                                                                           | 0.904          | 2.034                                    | 1.503                                   | -0.046                                  | 0.896          | 2.099                                    | 1.557                                   | -0.095                                  |
| SVM-RBF7                                                                                                                       | 0.896          | 2.109                                    | 1.552                                   | -0.007                                  | 0.890          | 2.165                                    | 1.603                                   | -0.041                                  |



**Table S4** Same as Table S4 but at Wuhan station.

| Input/Model                                                                                                                    | Training       |                                          |                                         |                                         | Testing        |                                          |                                         |                                         |
|--------------------------------------------------------------------------------------------------------------------------------|----------------|------------------------------------------|-----------------------------------------|-----------------------------------------|----------------|------------------------------------------|-----------------------------------------|-----------------------------------------|
|                                                                                                                                | R <sup>2</sup> | RMSE(MJm <sup>-2</sup> d <sup>-1</sup> ) | MAE(MJm <sup>-2</sup> d <sup>-1</sup> ) | MBE(MJm <sup>-2</sup> d <sup>-1</sup> ) | R <sup>2</sup> | RMSE(MJm <sup>-2</sup> d <sup>-1</sup> ) | MAE(MJm <sup>-2</sup> d <sup>-1</sup> ) | MBE(MJm <sup>-2</sup> d <sup>-1</sup> ) |
| <b><i>R<sub>e</sub> n/N (C1)</i></b>                                                                                           |                |                                          |                                         |                                         |                |                                          |                                         |                                         |
| XGBoost1                                                                                                                       | 0.906          | 2.314                                    | 1.736                                   | 0.000                                   | 0.890          | 2.475                                    | 1.868                                   | -0.012                                  |
| Catboost1                                                                                                                      | 0.903          | 2.351                                    | 1.762                                   | 0.000                                   | 0.891          | 2.467                                    | 1.859                                   | -0.014                                  |
| LightGBM1                                                                                                                      | 0.914          | 2.207                                    | 1.660                                   | 0.000                                   | 0.887          | 2.511                                    | 1.901                                   | -0.008                                  |
| CART1                                                                                                                          | 0.893          | 2.465                                    | 1.887                                   | 0.000                                   | 0.880          | 2.600                                    | 1.986                                   | -0.026                                  |
| ET1                                                                                                                            | 0.891          | 2.488                                    | 1.898                                   | 0.000                                   | 0.883          | 2.561                                    | 1.966                                   | -0.002                                  |
| RF1                                                                                                                            | 0.976          | 1.174                                    | 0.813                                   | 0.000                                   | 0.854          | 2.863                                    | 2.155                                   | 0.012                                   |
| GBDT1                                                                                                                          | 0.907          | 2.303                                    | 1.730                                   | 0.000                                   | 0.890          | 2.476                                    | 1.869                                   | -0.009                                  |
| MLP1                                                                                                                           | 0.893          | 2.464                                    | 1.865                                   | -0.005                                  | 0.888          | 2.511                                    | 1.908                                   | -0.015                                  |
| SVM-RBF1                                                                                                                       | 0.887          | 2.538                                    | 1.909                                   | -0.104                                  | 0.881          | 2.585                                    | 1.961                                   | -0.121                                  |
| <b><i>R<sub>e</sub> n/N T<sub>max</sub> T<sub>min</sub> (C2)</i></b>                                                           |                |                                          |                                         |                                         |                |                                          |                                         |                                         |
| XGBoost2                                                                                                                       | 0.918          | 2.163                                    | 1.618                                   | 0.000                                   | 0.900          | 2.366                                    | 1.776                                   | -0.012                                  |
| Catboost2                                                                                                                      | 0.922          | 2.101                                    | 1.573                                   | 0.000                                   | 0.904          | 2.312                                    | 1.723                                   | -0.004                                  |
| LightGBM2                                                                                                                      | 0.940          | 1.850                                    | 1.388                                   | 0.000                                   | 0.902          | 2.339                                    | 1.742                                   | -0.004                                  |
| CART2                                                                                                                          | 0.899          | 2.399                                    | 1.840                                   | 0.000                                   | 0.884          | 2.551                                    | 1.950                                   | -0.021                                  |
| ET2                                                                                                                            | 0.894          | 2.447                                    | 1.869                                   | 0.000                                   | 0.887          | 2.517                                    | 1.926                                   | -0.015                                  |
| RF2                                                                                                                            | 0.981          | 1.028                                    | 0.707                                   | -0.001                                  | 0.887          | 2.520                                    | 1.870                                   | -0.005                                  |
| GBDT2                                                                                                                          | 0.918          | 2.156                                    | 1.615                                   | 0.000                                   | 0.900          | 2.365                                    | 1.776                                   | -0.010                                  |
| MLP2                                                                                                                           | 0.903          | 2.349                                    | 1.754                                   | 0.026                                   | 0.898          | 2.387                                    | 1.786                                   | 0.036                                   |
| SVM-RBF2                                                                                                                       | 0.895          | 2.439                                    | 1.816                                   | -0.149                                  | 0.891          | 2.471                                    | 1.853                                   | -0.143                                  |
| <b><i>R<sub>e</sub> n/N H<sub>0</sub> U<sub>0</sub> (C3)</i></b>                                                               |                |                                          |                                         |                                         |                |                                          |                                         |                                         |
| XGBoost3                                                                                                                       | 0.919          | 2.145                                    | 1.590                                   | 0.000                                   | 0.895          | 2.408                                    | 1.829                                   | 0.054                                   |
| Catboost3                                                                                                                      | 0.919          | 2.146                                    | 1.582                                   | 0.000                                   | 0.895          | 2.413                                    | 1.829                                   | 0.069                                   |
| LightGBM3                                                                                                                      | 0.936          | 1.901                                    | 1.414                                   | 0.000                                   | 0.890          | 2.468                                    | 1.861                                   | 0.037                                   |
| CART3                                                                                                                          | 0.901          | 2.370                                    | 1.802                                   | 0.000                                   | 0.884          | 2.552                                    | 1.936                                   | -0.013                                  |
| ET3                                                                                                                            | 0.898          | 2.410                                    | 1.831                                   | 0.000                                   | 0.890          | 2.487                                    | 1.908                                   | 0.007                                   |
| RF3                                                                                                                            | 0.981          | 1.026                                    | 0.714                                   | 0.001                                   | 0.875          | 2.643                                    | 1.996                                   | 0.068                                   |
| GBDT3                                                                                                                          | 0.919          | 2.139                                    | 1.587                                   | 0.000                                   | 0.895          | 2.410                                    | 1.829                                   | 0.052                                   |
| MLP3                                                                                                                           | 0.902          | 2.356                                    | 1.765                                   | -0.046                                  | 0.889          | 2.484                                    | 1.900                                   | 0.004                                   |
| SVM-RBF                                                                                                                        | 0.898          | 2.402                                    | 1.794                                   | -0.079                                  | 0.887          | 2.510                                    | 1.913                                   | -0.018                                  |
| <b><i>R<sub>e</sub> n/N P<sub>re</sub> P<sub>rs</sub> (C4)</i></b>                                                             |                |                                          |                                         |                                         |                |                                          |                                         |                                         |
| XGBoost4                                                                                                                       | 0.925          | 2.064                                    | 1.527                                   | 0.000                                   | 0.910          | 2.239                                    | 1.669                                   | -0.012                                  |
| Catboost4                                                                                                                      | 0.925          | 2.068                                    | 1.528                                   | 0.000                                   | 0.911          | 2.226                                    | 1.659                                   | -0.011                                  |
| LightGBM4                                                                                                                      | 0.940          | 1.841                                    | 1.375                                   | 0.000                                   | 0.907          | 2.275                                    | 1.697                                   | -0.013                                  |
| CART4                                                                                                                          | 0.906          | 2.304                                    | 1.741                                   | 0.000                                   | 0.893          | 2.445                                    | 1.847                                   | -0.038                                  |
| ET4                                                                                                                            | 0.892          | 2.473                                    | 1.893                                   | 0.000                                   | 0.885          | 2.543                                    | 1.953                                   | -0.010                                  |
| RF4                                                                                                                            | 0.982          | 1.007                                    | 0.700                                   | 0.008                                   | 0.891          | 2.468                                    | 1.856                                   | -0.007                                  |
| GBDT4                                                                                                                          | 0.926          | 2.054                                    | 1.523                                   | 0.000                                   | 0.910          | 2.240                                    | 1.671                                   | -0.010                                  |
| MLP4                                                                                                                           | 0.904          | 2.337                                    | 1.753                                   | 0.049                                   | 0.895          | 2.413                                    | 1.829                                   | 0.040                                   |
| SVM-RBF4                                                                                                                       | 0.895          | 2.441                                    | 1.824                                   | -0.097                                  | 0.890          | 2.487                                    | 1.877                                   | -0.115                                  |
| <b><i>R<sub>e</sub> n/N T<sub>max</sub> T<sub>min</sub> H<sub>0</sub> U<sub>0</sub> (C5)</i></b>                               |                |                                          |                                         |                                         |                |                                          |                                         |                                         |
| XGBoost5                                                                                                                       | 0.925          | 2.060                                    | 1.524                                   | 0.000                                   | 0.902          | 2.335                                    | 1.761                                   | 0.066                                   |
| Catboost5                                                                                                                      | 0.931          | 1.982                                    | 1.465                                   | 0.000                                   | 0.904          | 2.303                                    | 1.724                                   | 0.094                                   |
| LightGBM5                                                                                                                      | 0.950          | 1.692                                    | 1.261                                   | 0.000                                   | 0.904          | 2.316                                    | 1.721                                   | 0.066                                   |
| CART5                                                                                                                          | 0.904          | 2.339                                    | 1.784                                   | 0.000                                   | 0.885          | 2.535                                    | 1.922                                   | 0.003                                   |
| ET5                                                                                                                            | 0.898          | 2.408                                    | 1.844                                   | 0.000                                   | 0.890          | 2.478                                    | 1.911                                   | -0.014                                  |
| RF5                                                                                                                            | 0.983          | 0.970                                    | 0.669                                   | 0.008                                   | 0.890          | 2.480                                    | 1.850                                   | 0.091                                   |
| GBDT5                                                                                                                          | 0.926          | 2.053                                    | 1.522                                   | 0.000                                   | 0.901          | 2.339                                    | 1.765                                   | 0.074                                   |
| MLP5                                                                                                                           | 0.911          | 2.253                                    | 1.669                                   | -0.031                                  | 0.902          | 2.344                                    | 1.759                                   | 0.025                                   |
| SVM-RBF5                                                                                                                       | 0.901          | 2.366                                    | 1.762                                   | -0.131                                  | 0.893          | 2.450                                    | 1.856                                   | -0.055                                  |
| <b><i>R<sub>e</sub> n/N T<sub>max</sub> T<sub>min</sub> P<sub>re</sub> P<sub>rs</sub> (C6)</i></b>                             |                |                                          |                                         |                                         |                |                                          |                                         |                                         |
| XGBoost6                                                                                                                       | 0.931          | 1.972                                    | 1.457                                   | 0.000                                   | 0.915          | 2.169                                    | 1.611                                   | -0.017                                  |
| Catboost6                                                                                                                      | 0.935          | 1.913                                    | 1.414                                   | 0.000                                   | 0.918          | 2.127                                    | 1.572                                   | 0.000                                   |
| LightGBM6                                                                                                                      | 0.953          | 1.640                                    | 1.220                                   | 0.000                                   | 0.916          | 2.159                                    | 1.592                                   | -0.007                                  |
| CART6                                                                                                                          | 0.908          | 2.282                                    | 1.729                                   | 0.000                                   | 0.895          | 2.422                                    | 1.831                                   | -0.036                                  |
| ET6                                                                                                                            | 0.898          | 2.403                                    | 1.841                                   | 0.000                                   | 0.892          | 2.458                                    | 1.891                                   | -0.003                                  |
| RF6                                                                                                                            | 0.985          | 0.931                                    | 0.646                                   | -0.001                                  | 0.903          | 2.330                                    | 1.739                                   | -0.005                                  |
| GBDT6                                                                                                                          | 0.932          | 1.964                                    | 1.456                                   | 0.000                                   | 0.915          | 2.171                                    | 1.614                                   | -0.014                                  |
| MLP6                                                                                                                           | 0.913          | 2.217                                    | 1.634                                   | -0.014                                  | 0.910          | 2.243                                    | 1.655                                   | -0.003                                  |
| SVM-RBF6                                                                                                                       | 0.901          | 2.371                                    | 1.768                                   | -0.135                                  | 0.897          | 2.407                                    | 1.808                                   | -0.135                                  |
| <b><i>R<sub>e</sub> n/N T<sub>max</sub> T<sub>min</sub> H<sub>0</sub> U<sub>0</sub> P<sub>re</sub> P<sub>rs</sub> (C7)</i></b> |                |                                          |                                         |                                         |                |                                          |                                         |                                         |
| XGBoost7                                                                                                                       | 0.933          | 1.947                                    | 1.438                                   | 0.000                                   | 0.913          | 2.197                                    | 1.644                                   | 0.063                                   |
| Catboost7                                                                                                                      | 0.938          | 1.873                                    | 1.380                                   | 0.000                                   | 0.916          | 2.152                                    | 1.599                                   | 0.079                                   |
| LightGBM7                                                                                                                      | 0.957          | 1.562                                    | 1.163                                   | 0.000                                   | 0.915          | 2.172                                    | 1.611                                   | 0.071                                   |
| CART7                                                                                                                          | 0.908          | 2.280                                    | 1.730                                   | 0.000                                   | 0.894          | 2.434                                    | 1.842                                   | -0.016                                  |
| ET7                                                                                                                            | 0.901          | 2.373                                    | 1.817                                   | 0.000                                   | 0.892          | 2.457                                    | 1.885                                   | -0.001                                  |
| RF7                                                                                                                            | 0.985          | 0.930                                    | 0.641                                   | 0.010                                   | 0.903          | 2.323                                    | 1.735                                   | 0.087                                   |
| GBDT7                                                                                                                          | 0.934          | 1.941                                    | 1.437                                   | 0.000                                   | 0.913          | 2.199                                    | 1.646                                   | 0.061                                   |
| MLP7                                                                                                                           | 0.915          | 2.200                                    | 1.628                                   | 0.074                                   | 0.906          | 2.294                                    | 1.719                                   | 0.123                                   |
| SVM-RBF7                                                                                                                       | 0.903          | 2.353                                    | 1.758                                   | -0.122                                  | 0.894          | 2.432                                    | 1.849                                   | -0.053                                  |

**Table S5** Same as Table S4 but at Shanghai station.

| Input/Model                                                                                                                                          | Training       |                                          |                                         |                                         | Testing        |                                          |                                         |                                         |
|------------------------------------------------------------------------------------------------------------------------------------------------------|----------------|------------------------------------------|-----------------------------------------|-----------------------------------------|----------------|------------------------------------------|-----------------------------------------|-----------------------------------------|
|                                                                                                                                                      | R <sup>2</sup> | RMSE(MJm <sup>-2</sup> d <sup>-1</sup> ) | MAE(MJm <sup>-2</sup> d <sup>-1</sup> ) | MBE(MJm <sup>-2</sup> d <sup>-1</sup> ) | R <sup>2</sup> | RMSE(MJm <sup>-2</sup> d <sup>-1</sup> ) | MAE(MJm <sup>-2</sup> d <sup>-1</sup> ) | MBE(MJm <sup>-2</sup> d <sup>-1</sup> ) |
| <b><math>R_a</math> n/N (C1)</b>                                                                                                                     |                |                                          |                                         |                                         |                |                                          |                                         |                                         |
| XGBoost1                                                                                                                                             | 0.925          | 1.979                                    | 1.504                                   | 0.000                                   | 0.912          | 2.127                                    | 1.618                                   | -0.001                                  |
| Catboost1                                                                                                                                            | 0.922          | 2.019                                    | 1.530                                   | 0.000                                   | 0.914          | 2.110                                    | 1.599                                   | 0.003                                   |
| LightGBM1                                                                                                                                            | 0.931          | 1.895                                    | 1.433                                   | 0.000                                   | 0.911          | 2.149                                    | 1.633                                   | 0.001                                   |
| CART1                                                                                                                                                | 0.908          | 2.190                                    | 1.694                                   | 0.000                                   | 0.896          | 2.316                                    | 1.785                                   | -0.008                                  |
| ET1                                                                                                                                                  | 0.910          | 2.166                                    | 1.676                                   | 0.000                                   | 0.905          | 2.211                                    | 1.711                                   | -0.006                                  |
| RF1                                                                                                                                                  | 0.981          | 0.998                                    | 0.695                                   | 0.004                                   | 0.883          | 2.458                                    | 1.846                                   | 0.021                                   |
| GBDT1                                                                                                                                                | 0.925          | 1.974                                    | 1.501                                   | 0.000                                   | 0.912          | 2.128                                    | 1.618                                   | -0.001                                  |
| MLP1                                                                                                                                                 | 0.915          | 2.101                                    | 1.599                                   | 0.043                                   | 0.911          | 2.143                                    | 1.633                                   | 0.042                                   |
| SVM-RBF1                                                                                                                                             | 0.906          | 2.214                                    | 1.686                                   | 0.003                                   | 0.901          | 2.256                                    | 1.720                                   | 0.006                                   |
| <b><math>R_a</math> n/N <math>T_{max}</math> <math>T_{min}</math> (C2)</b>                                                                           |                |                                          |                                         |                                         |                |                                          |                                         |                                         |
| XGBoost2                                                                                                                                             | 0.933          | 1.868                                    | 1.417                                   | 0.000                                   | 0.920          | 2.036                                    | 1.553                                   | 0.003                                   |
| Catboost2                                                                                                                                            | 0.935          | 1.836                                    | 1.388                                   | 0.000                                   | 0.923          | 1.998                                    | 1.512                                   | 0.010                                   |
| LightGBM2                                                                                                                                            | 0.950          | 1.621                                    | 1.228                                   | 0.000                                   | 0.919          | 2.043                                    | 1.544                                   | 0.001                                   |
| CART2                                                                                                                                                | 0.911          | 2.154                                    | 1.666                                   | 0.000                                   | 0.899          | 2.279                                    | 1.758                                   | -0.003                                  |
| ET2                                                                                                                                                  | 0.912          | 2.139                                    | 1.658                                   | 0.000                                   | 0.907          | 2.186                                    | 1.694                                   | 0.010                                   |
| RF2                                                                                                                                                  | 0.985          | 0.885                                    | 0.621                                   | -0.001                                  | 0.908          | 2.179                                    | 1.657                                   | -0.011                                  |
| GBDT2                                                                                                                                                | 0.934          | 1.861                                    | 1.413                                   | 0.000                                   | 0.920          | 2.036                                    | 1.553                                   | 0.003                                   |
| MLP2                                                                                                                                                 | 0.921          | 2.023                                    | 1.540                                   | 0.049                                   | 0.918          | 2.061                                    | 1.573                                   | 0.055                                   |
| SVM-RBF2                                                                                                                                             | 0.910          | 2.160                                    | 1.642                                   | -0.022                                  | 0.906          | 2.208                                    | 1.684                                   | -0.018                                  |
| <b><math>R_a</math> n/N <math>H_0</math> <math>U_0</math> (C3)</b>                                                                                   |                |                                          |                                         |                                         |                |                                          |                                         |                                         |
| XGBoost3                                                                                                                                             | 0.938          | 1.799                                    | 1.367                                   | 0.000                                   | 0.926          | 1.951                                    | 1.490                                   | 0.036                                   |
| Catboost3                                                                                                                                            | 0.938          | 1.802                                    | 1.364                                   | 0.000                                   | 0.928          | 1.933                                    | 1.469                                   | 0.040                                   |
| LightGBM3                                                                                                                                            | 0.951          | 1.598                                    | 1.212                                   | 0.000                                   | 0.925          | 1.972                                    | 1.498                                   | 0.024                                   |
| CART3                                                                                                                                                | 0.914          | 2.112                                    | 1.632                                   | 0.000                                   | 0.903          | 2.241                                    | 1.729                                   | 0.015                                   |
| ET3                                                                                                                                                  | 0.916          | 2.097                                    | 1.627                                   | 0.000                                   | 0.911          | 2.140                                    | 1.666                                   | 0.004                                   |
| RF3                                                                                                                                                  | 0.985          | 0.872                                    | 0.615                                   | -0.008                                  | 0.912          | 2.136                                    | 1.621                                   | -0.005                                  |
| GBDT3                                                                                                                                                | 0.938          | 1.796                                    | 1.366                                   | 0.000                                   | 0.926          | 1.954                                    | 1.492                                   | 0.029                                   |
| MLP3                                                                                                                                                 | 0.928          | 1.940                                    | 1.472                                   | -0.058                                  | 0.923          | 1.989                                    | 1.517                                   | -0.031                                  |
| SVM-RBF                                                                                                                                              | 0.920          | 2.038                                    | 1.556                                   | 0.030                                   | 0.917          | 2.071                                    | 1.587                                   | 0.064                                   |
| <b><math>R_a</math> n/N <math>P_{re}</math> <math>P_{rs}</math> (C4)</b>                                                                             |                |                                          |                                         |                                         |                |                                          |                                         |                                         |
| XGBoost4                                                                                                                                             | 0.941          | 1.747                                    | 1.333                                   | 0.000                                   | 0.930          | 1.905                                    | 1.459                                   | -0.001                                  |
| Catboost4                                                                                                                                            | 0.942          | 1.741                                    | 1.322                                   | 0.000                                   | 0.932          | 1.875                                    | 1.428                                   | 0.003                                   |
| LightGBM4                                                                                                                                            | 0.954          | 1.549                                    | 1.179                                   | 0.000                                   | 0.928          | 1.927                                    | 1.469                                   | -0.003                                  |
| CART4                                                                                                                                                | 0.917          | 2.076                                    | 1.607                                   | 0.000                                   | 0.906          | 2.201                                    | 1.703                                   | -0.005                                  |
| ET4                                                                                                                                                  | 0.913          | 2.128                                    | 1.659                                   | 0.000                                   | 0.908          | 2.184                                    | 1.697                                   | 0.006                                   |
| RF4                                                                                                                                                  | 0.986          | 0.841                                    | 0.595                                   | 0.004                                   | 0.916          | 2.079                                    | 1.579                                   | -0.013                                  |
| GBDT4                                                                                                                                                | 0.942          | 1.741                                    | 1.329                                   | 0.000                                   | 0.930          | 1.907                                    | 1.458                                   | -0.001                                  |
| MLP4                                                                                                                                                 | 0.927          | 1.945                                    | 1.480                                   | -0.013                                  | 0.922          | 2.002                                    | 1.528                                   | -0.017                                  |
| SVM-RBF4                                                                                                                                             | 0.915          | 2.102                                    | 1.598                                   | -0.021                                  | 0.911          | 2.140                                    | 1.632                                   | -0.019                                  |
| <b><math>R_a</math> n/N <math>T_{max}</math> <math>T_{min}</math> <math>H_0</math> <math>U_0</math> (C5)</b>                                         |                |                                          |                                         |                                         |                |                                          |                                         |                                         |
| XGBoost5                                                                                                                                             | 0.942          | 1.732                                    | 1.313                                   | 0.000                                   | 0.929          | 1.910                                    | 1.457                                   | 0.027                                   |
| Catboost5                                                                                                                                            | 0.945          | 1.688                                    | 1.274                                   | 0.000                                   | 0.933          | 1.865                                    | 1.418                                   | 0.038                                   |
| LightGBM5                                                                                                                                            | 0.960          | 1.438                                    | 1.091                                   | 0.000                                   | 0.930          | 1.898                                    | 1.432                                   | 0.017                                   |
| CART5                                                                                                                                                | 0.915          | 2.104                                    | 1.626                                   | 0.000                                   | 0.902          | 2.245                                    | 1.737                                   | -0.001                                  |
| ET5                                                                                                                                                  | 0.917          | 2.075                                    | 1.611                                   | 0.000                                   | 0.913          | 2.121                                    | 1.645                                   | 0.001                                   |
| RF5                                                                                                                                                  | 0.987          | 0.823                                    | 0.577                                   | -0.004                                  | 0.921          | 2.015                                    | 1.537                                   | 0.020                                   |
| GBDT5                                                                                                                                                | 0.943          | 1.730                                    | 1.313                                   | 0.000                                   | 0.930          | 1.906                                    | 1.454                                   | 0.028                                   |
| MLP5                                                                                                                                                 | 0.932          | 1.889                                    | 1.431                                   | -0.008                                  | 0.926          | 1.954                                    | 1.488                                   | 0.012                                   |
| SVM-RBF5                                                                                                                                             | 0.920          | 2.046                                    | 1.567                                   | 0.001                                   | 0.916          | 2.084                                    | 1.604                                   | 0.028                                   |
| <b><math>R_a</math> n/N <math>T_{max}</math> <math>T_{min}</math> <math>P_{re}</math> <math>P_{rs}</math> (C6)</b>                                   |                |                                          |                                         |                                         |                |                                          |                                         |                                         |
| XGBoost6                                                                                                                                             | 0.946          | 1.681                                    | 1.284                                   | 0.000                                   | 0.934          | 1.851                                    | 1.421                                   | 0.008                                   |
| Catboost6                                                                                                                                            | 0.948          | 1.646                                    | 1.254                                   | 0.000                                   | 0.936          | 1.819                                    | 1.391                                   | 0.010                                   |
| LightGBM6                                                                                                                                            | 0.962          | 1.409                                    | 1.079                                   | 0.000                                   | 0.934          | 1.848                                    | 1.407                                   | 0.004                                   |
| CART6                                                                                                                                                | 0.918          | 2.061                                    | 1.597                                   | 0.000                                   | 0.907          | 2.187                                    | 1.689                                   | -0.006                                  |
| ET6                                                                                                                                                  | 0.916          | 2.096                                    | 1.623                                   | 0.000                                   | 0.910          | 2.153                                    | 1.666                                   | -0.006                                  |
| RF6                                                                                                                                                  | 0.988          | 0.805                                    | 0.572                                   | 0.001                                   | 0.924          | 1.986                                    | 1.516                                   | 0.007                                   |
| GBDT6                                                                                                                                                | 0.946          | 1.677                                    | 1.283                                   | 0.000                                   | 0.934          | 1.852                                    | 1.420                                   | 0.003                                   |
| MLP6                                                                                                                                                 | 0.929          | 1.920                                    | 1.458                                   | -0.043                                  | 0.925          | 1.971                                    | 1.504                                   | -0.038                                  |
| SVM-RBF6                                                                                                                                             | 0.916          | 2.094                                    | 1.602                                   | -0.024                                  | 0.912          | 2.131                                    | 1.636                                   | -0.017                                  |
| <b><math>R_a</math> n/N <math>T_{max}</math> <math>T_{min}</math> <math>H_0</math> <math>U_0</math> <math>P_{re}</math> <math>P_{rs}</math> (C7)</b> |                |                                          |                                         |                                         |                |                                          |                                         |                                         |
| XGBoost7                                                                                                                                             | 0.948          | 1.650                                    | 1.261                                   | 0.000                                   | 0.936          | 1.823                                    | 1.398                                   | 0.023                                   |
| Catboost7                                                                                                                                            | 0.951          | 1.604                                    | 1.221                                   | 0.000                                   | 0.939          | 1.781                                    | 1.360                                   | 0.028                                   |
| LightGBM7                                                                                                                                            | 0.966          | 1.339                                    | 1.025                                   | 0.000                                   | 0.936          | 1.813                                    | 1.377                                   | 0.018                                   |
| CART7                                                                                                                                                | 0.918          | 2.061                                    | 1.596                                   | 0.000                                   | 0.907          | 2.189                                    | 1.691                                   | -0.002                                  |
| ET7                                                                                                                                                  | 0.915          | 2.107                                    | 1.638                                   | 0.000                                   | 0.910          | 2.157                                    | 1.679                                   | 0.007                                   |
| RF7                                                                                                                                                  | 0.988          | 0.788                                    | 0.560                                   | -0.007                                  | 0.926          | 1.953                                    | 1.492                                   | -0.007                                  |
| GBDT7                                                                                                                                                | 0.948          | 1.645                                    | 1.259                                   | 0.000                                   | 0.936          | 1.822                                    | 1.398                                   | 0.016                                   |
| MLP7                                                                                                                                                 | 0.933          | 1.866                                    | 1.415                                   | -0.077                                  | 0.929          | 1.917                                    | 1.460                                   | -0.060                                  |
| SVM-RBF7                                                                                                                                             | 0.919          | 2.056                                    | 1.586                                   | -0.008                                  | 0.916          | 2.088                                    | 1.617                                   | 0.015                                   |



**Table S6** Same as Table S4 but at Chengdu station.

| Input/Model                                                                                                                    | Training       |                                          |                                         |                                         | Testing        |                                          |                                         |                                         |
|--------------------------------------------------------------------------------------------------------------------------------|----------------|------------------------------------------|-----------------------------------------|-----------------------------------------|----------------|------------------------------------------|-----------------------------------------|-----------------------------------------|
|                                                                                                                                | R <sup>2</sup> | RMSE(MJm <sup>-2</sup> d <sup>-1</sup> ) | MAE(MJm <sup>-2</sup> d <sup>-1</sup> ) | MBE(MJm <sup>-2</sup> d <sup>-1</sup> ) | R <sup>2</sup> | RMSE(MJm <sup>-2</sup> d <sup>-1</sup> ) | MAE(MJm <sup>-2</sup> d <sup>-1</sup> ) | MBE(MJm <sup>-2</sup> d <sup>-1</sup> ) |
| <b><i>R<sub>e</sub> n/N</i> (C1)</b>                                                                                           |                |                                          |                                         |                                         |                |                                          |                                         |                                         |
| XGBoost1                                                                                                                       | 0.873          | 2.314                                    | 1.782                                   | 0.000                                   | 0.841          | 2.531                                    | 1.985                                   | -0.065                                  |
| Catboost1                                                                                                                      | 0.869          | 2.353                                    | 1.807                                   | 0.000                                   | 0.843          | 2.514                                    | 1.970                                   | -0.067                                  |
| LightGBM1                                                                                                                      | 0.882          | 2.232                                    | 1.715                                   | 0.000                                   | 0.837          | 2.559                                    | 2.006                                   | -0.067                                  |
| CART1                                                                                                                          | 0.856          | 2.461                                    | 1.904                                   | 0.000                                   | 0.825          | 2.658                                    | 2.084                                   | -0.066                                  |
| ET1                                                                                                                            | 0.857          | 2.455                                    | 1.907                                   | 0.000                                   | 0.837          | 2.566                                    | 2.022                                   | -0.054                                  |
| RF1                                                                                                                            | 0.967          | 1.182                                    | 0.837                                   | 0.004                                   | 0.785          | 2.956                                    | 2.283                                   | -0.076                                  |
| GBDT1                                                                                                                          | 0.874          | 2.308                                    | 1.779                                   | 0.000                                   | 0.841          | 2.532                                    | 1.987                                   | -0.065                                  |
| MLP1                                                                                                                           | 0.858          | 2.448                                    | 1.894                                   | -0.024                                  | 0.839          | 2.551                                    | 2.005                                   | -0.086                                  |
| SVM-RBF1                                                                                                                       | 0.848          | 2.535                                    | 1.955                                   | -0.082                                  | 0.827          | 2.642                                    | 2.073                                   | -0.151                                  |
| <b><i>R<sub>e</sub> n/N T<sub>max</sub> T<sub>min</sub></i> (C2)</b>                                                           |                |                                          |                                         |                                         |                |                                          |                                         |                                         |
| XGBoost2                                                                                                                       | 0.903          | 2.024                                    | 1.541                                   | 0.000                                   | 0.871          | 2.271                                    | 1.760                                   | -0.055                                  |
| Catboost2                                                                                                                      | 0.909          | 1.964                                    | 1.479                                   | 0.000                                   | 0.878          | 2.208                                    | 1.692                                   | -0.048                                  |
| LightGBM2                                                                                                                      | 0.929          | 1.735                                    | 1.309                                   | 0.000                                   | 0.873          | 2.254                                    | 1.718                                   | -0.051                                  |
| CART2                                                                                                                          | 0.869          | 2.349                                    | 1.805                                   | 0.000                                   | 0.835          | 2.582                                    | 2.012                                   | -0.042                                  |
| ET2                                                                                                                            | 0.865          | 2.385                                    | 1.856                                   | 0.000                                   | 0.845          | 2.506                                    | 1.979                                   | -0.056                                  |
| RF2                                                                                                                            | 0.978          | 0.955                                    | 0.669                                   | 0.011                                   | 0.856          | 2.408                                    | 1.831                                   | -0.048                                  |
| GBDT2                                                                                                                          | 0.903          | 2.023                                    | 1.542                                   | 0.000                                   | 0.870          | 2.277                                    | 1.766                                   | -0.054                                  |
| MLP2                                                                                                                           | 0.883          | 2.224                                    | 1.695                                   | 0.004                                   | 0.867          | 2.313                                    | 1.790                                   | -0.064                                  |
| SVM-RBF2                                                                                                                       | 0.875          | 2.292                                    | 1.743                                   | -0.098                                  | 0.858          | 2.386                                    | 1.842                                   | -0.161                                  |
| <b><i>R<sub>e</sub> n/N H<sub>0</sub> U<sub>0</sub></i> (C3)</b>                                                               |                |                                          |                                         |                                         |                |                                          |                                         |                                         |
| XGBoost3                                                                                                                       | 0.902          | 2.034                                    | 1.553                                   | 0.000                                   | 0.874          | 2.259                                    | 1.747                                   | -0.053                                  |
| Catboost3                                                                                                                      | 0.901          | 2.044                                    | 1.559                                   | 0.000                                   | 0.876          | 2.239                                    | 1.725                                   | -0.040                                  |
| LightGBM3                                                                                                                      | 0.921          | 1.823                                    | 1.393                                   | 0.000                                   | 0.874          | 2.263                                    | 1.751                                   | -0.044                                  |
| CART3                                                                                                                          | 0.873          | 2.319                                    | 1.783                                   | 0.000                                   | 0.839          | 2.554                                    | 1.990                                   | -0.057                                  |
| ET3                                                                                                                            | 0.864          | 2.392                                    | 1.862                                   | 0.000                                   | 0.843          | 2.524                                    | 1.995                                   | -0.054                                  |
| RF3                                                                                                                            | 0.977          | 0.989                                    | 0.705                                   | -0.002                                  | 0.849          | 2.479                                    | 1.913                                   | -0.049                                  |
| GBDT3                                                                                                                          | 0.902          | 2.033                                    | 1.554                                   | 0.000                                   | 0.873          | 2.267                                    | 1.756                                   | -0.053                                  |
| MLP3                                                                                                                           | 0.879          | 2.257                                    | 1.740                                   | 0.024                                   | 0.863          | 2.360                                    | 1.839                                   | -0.047                                  |
| SVM-RBF                                                                                                                        | 0.875          | 2.298                                    | 1.771                                   | -0.005                                  | 0.858          | 2.398                                    | 1.870                                   | -0.088                                  |
| <b><i>R<sub>e</sub> n/N P<sub>re</sub> P<sub>rs</sub></i> (C4)</b>                                                             |                |                                          |                                         |                                         |                |                                          |                                         |                                         |
| XGBoost4                                                                                                                       | 0.889          | 2.161                                    | 1.670                                   | 0.000                                   | 0.856          | 2.410                                    | 1.892                                   | -0.062                                  |
| Catboost4                                                                                                                      | 0.890          | 2.159                                    | 1.668                                   | 0.000                                   | 0.856          | 2.405                                    | 1.887                                   | -0.058                                  |
| LightGBM4                                                                                                                      | 0.911          | 1.935                                    | 1.499                                   | 0.000                                   | 0.850          | 2.463                                    | 1.924                                   | -0.067                                  |
| CART4                                                                                                                          | 0.867          | 2.372                                    | 1.836                                   | 0.000                                   | 0.835          | 2.584                                    | 2.025                                   | -0.066                                  |
| ET4                                                                                                                            | 0.858          | 2.448                                    | 1.911                                   | 0.000                                   | 0.837          | 2.574                                    | 2.039                                   | -0.058                                  |
| RF4                                                                                                                            | 0.974          | 1.051                                    | 0.752                                   | -0.009                                  | 0.828          | 2.646                                    | 2.059                                   | -0.078                                  |
| GBDT4                                                                                                                          | 0.890          | 2.154                                    | 1.666                                   | 0.000                                   | 0.855          | 2.414                                    | 1.896                                   | -0.064                                  |
| MLP4                                                                                                                           | 0.862          | 2.416                                    | 1.876                                   | 0.002                                   | 0.841          | 2.535                                    | 1.998                                   | -0.055                                  |
| SVM-RBF4                                                                                                                       | 0.850          | 2.518                                    | 1.950                                   | -0.074                                  | 0.829          | 2.631                                    | 2.071                                   | -0.142                                  |
| <b><i>R<sub>e</sub> n/N T<sub>max</sub> T<sub>min</sub> H<sub>0</sub> U<sub>0</sub></i> (C5)</b>                               |                |                                          |                                         |                                         |                |                                          |                                         |                                         |
| XGBoost5                                                                                                                       | 0.916          | 1.881                                    | 1.425                                   | 0.000                                   | 0.888          | 2.124                                    | 1.632                                   | -0.051                                  |
| Catboost5                                                                                                                      | 0.923          | 1.804                                    | 1.360                                   | 0.000                                   | 0.895          | 2.055                                    | 1.563                                   | -0.022                                  |
| LightGBM5                                                                                                                      | 0.945          | 1.527                                    | 1.156                                   | 0.000                                   | 0.894          | 2.062                                    | 1.564                                   | -0.038                                  |
| CART5                                                                                                                          | 0.877          | 2.276                                    | 1.748                                   | 0.000                                   | 0.843          | 2.522                                    | 1.967                                   | -0.056                                  |
| ET5                                                                                                                            | 0.874          | 2.304                                    | 1.798                                   | 0.000                                   | 0.855          | 2.419                                    | 1.899                                   | -0.073                                  |
| RF5                                                                                                                            | 0.982          | 0.878                                    | 0.618                                   | -0.005                                  | 0.878          | 2.220                                    | 1.686                                   | -0.027                                  |
| GBDT5                                                                                                                          | 0.917          | 1.875                                    | 1.423                                   | 0.000                                   | 0.888          | 2.122                                    | 1.630                                   | -0.047                                  |
| MLP5                                                                                                                           | 0.897          | 2.085                                    | 1.575                                   | -0.181                                  | 0.882          | 2.178                                    | 1.663                                   | -0.252                                  |
| SVM-RBF5                                                                                                                       | 0.889          | 2.165                                    | 1.644                                   | -0.062                                  | 0.875          | 2.247                                    | 1.727                                   | -0.138                                  |
| <b><i>R<sub>e</sub> n/N T<sub>max</sub> T<sub>min</sub> P<sub>re</sub> P<sub>rs</sub></i> (C6)</b>                             |                |                                          |                                         |                                         |                |                                          |                                         |                                         |
| XGBoost6                                                                                                                       | 0.910          | 1.952                                    | 1.499                                   | 0.000                                   | 0.877          | 2.221                                    | 1.733                                   | -0.047                                  |
| Catboost6                                                                                                                      | 0.917          | 1.865                                    | 1.421                                   | 0.000                                   | 0.884          | 2.156                                    | 1.668                                   | -0.046                                  |
| LightGBM6                                                                                                                      | 0.939          | 1.602                                    | 1.221                                   | 0.000                                   | 0.880          | 2.192                                    | 1.682                                   | -0.043                                  |
| CART6                                                                                                                          | 0.872          | 2.322                                    | 1.792                                   | 0.000                                   | 0.839          | 2.556                                    | 1.998                                   | -0.045                                  |
| ET6                                                                                                                            | 0.868          | 2.361                                    | 1.840                                   | 0.000                                   | 0.849          | 2.473                                    | 1.951                                   | -0.071                                  |
| RF6                                                                                                                            | 0.980          | 0.909                                    | 0.644                                   | 0.001                                   | 0.867          | 2.317                                    | 1.771                                   | -0.048                                  |
| GBDT6                                                                                                                          | 0.910          | 1.949                                    | 1.498                                   | 0.000                                   | 0.876          | 2.224                                    | 1.734                                   | -0.049                                  |
| MLP6                                                                                                                           | 0.891          | 2.147                                    | 1.636                                   | 0.032                                   | 0.876          | 2.235                                    | 1.723                                   | -0.022                                  |
| SVM-RBF6                                                                                                                       | 0.874          | 2.301                                    | 1.761                                   | -0.100                                  | 0.856          | 2.408                                    | 1.871                                   | -0.165                                  |
| <b><i>R<sub>e</sub> n/N T<sub>max</sub> T<sub>min</sub> H<sub>0</sub> U<sub>0</sub> P<sub>re</sub> P<sub>rs</sub></i> (C7)</b> |                |                                          |                                         |                                         |                |                                          |                                         |                                         |
| XGBoost7                                                                                                                       | 0.918          | 1.865                                    | 1.415                                   | 0.000                                   | 0.889          | 2.120                                    | 1.629                                   | -0.048                                  |
| Catboost7                                                                                                                      | 0.926          | 1.764                                    | 1.333                                   | 0.000                                   | 0.897          | 2.038                                    | 1.555                                   | -0.032                                  |
| LightGBM7                                                                                                                      | 0.949          | 1.467                                    | 1.116                                   | 0.000                                   | 0.897          | 2.041                                    | 1.556                                   | -0.045                                  |
| CART7                                                                                                                          | 0.878          | 2.273                                    | 1.747                                   | 0.000                                   | 0.843          | 2.525                                    | 1.968                                   | -0.059                                  |
| ET7                                                                                                                            | 0.873          | 2.313                                    | 1.807                                   | 0.000                                   | 0.854          | 2.427                                    | 1.909                                   | -0.084                                  |
| RF7                                                                                                                            | 0.982          | 0.880                                    | 0.620                                   | 0.002                                   | 0.879          | 2.211                                    | 1.679                                   | -0.054                                  |
| GBDT7                                                                                                                          | 0.918          | 1.863                                    | 1.416                                   | 0.000                                   | 0.888          | 2.123                                    | 1.634                                   | -0.055                                  |
| MLP7                                                                                                                           | 0.899          | 2.060                                    | 1.561                                   | 0.036                                   | 0.884          | 2.163                                    | 1.656                                   | -0.025                                  |
| SVM-RBF7                                                                                                                       | 0.886          | 2.197                                    | 1.678                                   | -0.059                                  | 0.871          | 2.283                                    | 1.763                                   | -0.139                                  |

**Table S7** Same as Table S4 but at Haerbin station.

| Input/Model                                                            | Training       |                                          |                                         |                                         | Testing        |                                          |                                         |                                         |
|------------------------------------------------------------------------|----------------|------------------------------------------|-----------------------------------------|-----------------------------------------|----------------|------------------------------------------|-----------------------------------------|-----------------------------------------|
|                                                                        | R <sup>2</sup> | RMSE(MJm <sup>-2</sup> d <sup>-1</sup> ) | MAE(MJm <sup>-2</sup> d <sup>-1</sup> ) | MBE(MJm <sup>-2</sup> d <sup>-1</sup> ) | R <sup>2</sup> | RMSE(MJm <sup>-2</sup> d <sup>-1</sup> ) | MAE(MJm <sup>-2</sup> d <sup>-1</sup> ) | MBE(MJm <sup>-2</sup> d <sup>-1</sup> ) |
| <b><math>R_e n/N</math> (C1)</b>                                       |                |                                          |                                         |                                         |                |                                          |                                         |                                         |
| XGBoost1                                                               | 0.933          | 1.873                                    | 1.359                                   | 0.000                                   | 0.915          | 2.075                                    | 1.535                                   | -0.035                                  |
| Catboost1                                                              | 0.930          | 1.912                                    | 1.383                                   | 0.000                                   | 0.916          | 2.056                                    | 1.516                                   | -0.035                                  |
| LightGBM1                                                              | 0.940          | 1.760                                    | 1.280                                   | 0.000                                   | 0.913          | 2.103                                    | 1.550                                   | -0.036                                  |
| CART1                                                                  | 0.911          | 2.150                                    | 1.596                                   | 0.000                                   | 0.895          | 2.318                                    | 1.738                                   | -0.027                                  |
| ET1                                                                    | 0.913          | 2.124                                    | 1.574                                   | 0.000                                   | 0.905          | 2.196                                    | 1.647                                   | -0.034                                  |
| RF1                                                                    | 0.983          | 0.932                                    | 0.629                                   | -0.001                                  | 0.894          | 2.331                                    | 1.716                                   | -0.029                                  |
| GBDT1                                                                  | 0.933          | 1.868                                    | 1.356                                   | 0.000                                   | 0.915          | 2.078                                    | 1.534                                   | -0.035                                  |
| MLP1                                                                   | 0.920          | 2.046                                    | 1.501                                   | 0.018                                   | 0.913          | 2.098                                    | 1.561                                   | -0.037                                  |
| SVM-RBF1                                                               | 0.924          | 1.985                                    | 1.433                                   | 0.043                                   | 0.917          | 2.046                                    | 1.506                                   | -0.010                                  |
| <b><math>R_e n/N T_{max} T_{min}</math> (C2)</b>                       |                |                                          |                                         |                                         |                |                                          |                                         |                                         |
| XGBoost2                                                               | 0.939          | 1.777                                    | 1.281                                   | 0.000                                   | 0.921          | 2.001                                    | 1.474                                   | -0.030                                  |
| Catboost2                                                              | 0.942          | 1.743                                    | 1.259                                   | 0.000                                   | 0.923          | 1.971                                    | 1.449                                   | -0.037                                  |
| LightGBM2                                                              | 0.956          | 1.507                                    | 1.108                                   | 0.000                                   | 0.920          | 2.010                                    | 1.478                                   | -0.033                                  |
| CART2                                                                  | 0.912          | 2.140                                    | 1.589                                   | 0.000                                   | 0.895          | 2.321                                    | 1.737                                   | -0.021                                  |
| ET2                                                                    | 0.914          | 2.122                                    | 1.576                                   | 0.000                                   | 0.906          | 2.197                                    | 1.654                                   | -0.026                                  |
| RF2                                                                    | 0.986          | 0.855                                    | 0.575                                   | 0.007                                   | 0.911          | 2.134                                    | 1.571                                   | -0.027                                  |
| GBDT2                                                                  | 0.940          | 1.771                                    | 1.279                                   | 0.000                                   | 0.920          | 2.004                                    | 1.475                                   | -0.033                                  |
| MLP2                                                                   | 0.924          | 1.984                                    | 1.438                                   | -0.003                                  | 0.916          | 2.061                                    | 1.518                                   | -0.056                                  |
| SVM-RBF2                                                               | 0.926          | 1.960                                    | 1.404                                   | 0.029                                   | 0.919          | 2.027                                    | 1.483                                   | -0.022                                  |
| <b><math>R_e n/N H_0 U_0</math> (C3)</b>                               |                |                                          |                                         |                                         |                |                                          |                                         |                                         |
| XGBoost3                                                               | 0.940          | 1.767                                    | 1.285                                   | 0.000                                   | 0.920          | 2.012                                    | 1.501                                   | -0.057                                  |
| Catboost3                                                              | 0.941          | 1.756                                    | 1.272                                   | 0.000                                   | 0.922          | 1.985                                    | 1.477                                   | -0.064                                  |
| LightGBM3                                                              | 0.956          | 1.515                                    | 1.112                                   | 0.000                                   | 0.916          | 2.054                                    | 1.521                                   | -0.063                                  |
| CART3                                                                  | 0.912          | 2.137                                    | 1.585                                   | 0.000                                   | 0.895          | 2.320                                    | 1.737                                   | -0.019                                  |
| ET3                                                                    | 0.916          | 2.097                                    | 1.558                                   | 0.000                                   | 0.906          | 2.195                                    | 1.646                                   | -0.043                                  |
| RF3                                                                    | 0.986          | 0.861                                    | 0.581                                   | -0.006                                  | 0.908          | 2.167                                    | 1.609                                   | -0.068                                  |
| GBDT3                                                                  | 0.941          | 1.758                                    | 1.281                                   | 0.000                                   | 0.919          | 2.014                                    | 1.503                                   | -0.058                                  |
| MLP3                                                                   | 0.927          | 1.953                                    | 1.434                                   | 0.072                                   | 0.919          | 2.022                                    | 1.513                                   | -0.001                                  |
| SVM-RBF                                                                | 0.930          | 1.907                                    | 1.387                                   | 0.024                                   | 0.922          | 1.986                                    | 1.480                                   | -0.050                                  |
| <b><math>R_e n/N P_{re} P_{rs}</math> (C4)</b>                         |                |                                          |                                         |                                         |                |                                          |                                         |                                         |
| XGBoost4                                                               | 0.943          | 1.720                                    | 1.252                                   | 0.000                                   | 0.925          | 1.948                                    | 1.445                                   | -0.018                                  |
| Catboost4                                                              | 0.943          | 1.719                                    | 1.250                                   | 0.000                                   | 0.927          | 1.922                                    | 1.425                                   | -0.013                                  |
| LightGBM4                                                              | 0.957          | 1.491                                    | 1.100                                   | 0.000                                   | 0.924          | 1.966                                    | 1.456                                   | -0.020                                  |
| CART4                                                                  | 0.915          | 2.111                                    | 1.570                                   | 0.000                                   | 0.897          | 2.298                                    | 1.720                                   | -0.025                                  |
| ET4                                                                    | 0.916          | 2.090                                    | 1.545                                   | 0.000                                   | 0.906          | 2.182                                    | 1.634                                   | -0.029                                  |
| RF4                                                                    | 0.987          | 0.835                                    | 0.567                                   | -0.001                                  | 0.914          | 2.091                                    | 1.550                                   | -0.011                                  |
| GBDT4                                                                  | 0.944          | 1.711                                    | 1.247                                   | 0.000                                   | 0.925          | 1.948                                    | 1.445                                   | -0.014                                  |
| MLP4                                                                   | 0.925          | 1.972                                    | 1.451                                   | -0.016                                  | 0.917          | 2.056                                    | 1.544                                   | -0.061                                  |
| SVM-RBF4                                                               | 0.929          | 1.923                                    | 1.393                                   | 0.026                                   | 0.922          | 1.988                                    | 1.471                                   | -0.013                                  |
| <b><math>R_e n/N T_{max} T_{min} H_0 U_0</math> (C5)</b>               |                |                                          |                                         |                                         |                |                                          |                                         |                                         |
| XGBoost5                                                               | 0.944          | 1.708                                    | 1.238                                   | 0.000                                   | 0.923          | 1.971                                    | 1.464                                   | -0.053                                  |
| Catboost5                                                              | 0.947          | 1.660                                    | 1.201                                   | 0.000                                   | 0.926          | 1.932                                    | 1.435                                   | -0.067                                  |
| LightGBM5                                                              | 0.963          | 1.384                                    | 1.019                                   | 0.000                                   | 0.922          | 1.988                                    | 1.469                                   | -0.075                                  |
| CART5                                                                  | 0.913          | 2.130                                    | 1.582                                   | 0.000                                   | 0.895          | 2.322                                    | 1.740                                   | -0.020                                  |
| ET5                                                                    | 0.915          | 2.110                                    | 1.568                                   | 0.000                                   | 0.906          | 2.188                                    | 1.646                                   | -0.039                                  |
| RF5                                                                    | 0.987          | 0.817                                    | 0.550                                   | 0.000                                   | 0.915          | 2.078                                    | 1.535                                   | -0.042                                  |
| GBDT5                                                                  | 0.944          | 1.701                                    | 1.235                                   | 0.000                                   | 0.923          | 1.974                                    | 1.465                                   | -0.056                                  |
| MLP5                                                                   | 0.931          | 1.889                                    | 1.369                                   | 0.075                                   | 0.920          | 2.003                                    | 1.490                                   | 0.013                                   |
| SVM-RBF5                                                               | 0.928          | 1.936                                    | 1.397                                   | 0.025                                   | 0.920          | 2.008                                    | 1.486                                   | -0.051                                  |
| <b><math>R_e n/N T_{max} T_{min} P_{re} P_{rs}</math> (C6)</b>         |                |                                          |                                         |                                         |                |                                          |                                         |                                         |
| XGBoost6                                                               | 0.947          | 1.669                                    | 1.213                                   | 0.000                                   | 0.927          | 1.917                                    | 1.421                                   | -0.021                                  |
| Catboost6                                                              | 0.950          | 1.622                                    | 1.179                                   | 0.000                                   | 0.930          | 1.880                                    | 1.393                                   | -0.019                                  |
| LightGBM6                                                              | 0.965          | 1.358                                    | 1.010                                   | 0.000                                   | 0.927          | 1.920                                    | 1.420                                   | -0.022                                  |
| CART6                                                                  | 0.915          | 2.112                                    | 1.571                                   | 0.000                                   | 0.896          | 2.312                                    | 1.730                                   | -0.025                                  |
| ET6                                                                    | 0.916          | 2.092                                    | 1.553                                   | 0.000                                   | 0.908          | 2.168                                    | 1.625                                   | -0.054                                  |
| RF6                                                                    | 0.988          | 0.796                                    | 0.544                                   | -0.004                                  | 0.919          | 2.030                                    | 1.505                                   | -0.017                                  |
| GBDT6                                                                  | 0.947          | 1.662                                    | 1.211                                   | 0.000                                   | 0.927          | 1.918                                    | 1.422                                   | -0.023                                  |
| MLP6                                                                   | 0.931          | 1.899                                    | 1.377                                   | 0.006                                   | 0.924          | 1.965                                    | 1.450                                   | -0.021                                  |
| SVM-RBF6                                                               | 0.927          | 1.952                                    | 1.406                                   | 0.010                                   | 0.919          | 2.022                                    | 1.490                                   | -0.027                                  |
| <b><math>R_e n/N T_{max} T_{min} H_0 U_0 P_{re} P_{rs}</math> (C7)</b> |                |                                          |                                         |                                         |                |                                          |                                         |                                         |
| XGBoost7                                                               | 0.948          | 1.638                                    | 1.193                                   | 0.000                                   | 0.927          | 1.917                                    | 1.428                                   | -0.045                                  |
| Catboost7                                                              | 0.952          | 1.584                                    | 1.154                                   | 0.000                                   | 0.930          | 1.882                                    | 1.402                                   | -0.040                                  |
| LightGBM7                                                              | 0.968          | 1.289                                    | 0.956                                   | 0.000                                   | 0.927          | 1.924                                    | 1.425                                   | -0.046                                  |
| CART7                                                                  | 0.915          | 2.112                                    | 1.571                                   | 0.000                                   | 0.896          | 2.313                                    | 1.732                                   | -0.028                                  |
| ET7                                                                    | 0.915          | 2.108                                    | 1.574                                   | 0.000                                   | 0.904          | 2.208                                    | 1.662                                   | -0.052                                  |
| RF7                                                                    | 0.988          | 0.782                                    | 0.530                                   | 0.005                                   | 0.921          | 2.007                                    | 1.484                                   | -0.029                                  |
| GBDT7                                                                  | 0.949          | 1.632                                    | 1.192                                   | 0.000                                   | 0.928          | 1.911                                    | 1.424                                   | -0.039                                  |
| MLP7                                                                   | 0.932          | 1.880                                    | 1.373                                   | -0.083                                  | 0.922          | 1.988                                    | 1.487                                   | -0.155                                  |
| SVM-RBF7                                                               | 0.927          | 1.955                                    | 1.418                                   | 0.004                                   | 0.918          | 2.033                                    | 1.513                                   | -0.053                                  |

**Table S8** Same as Table S4 but at Shenyang station.

| Input/Model                                                                                                                    | Training       |                                          |                                         |                                         | Testing        |                                          |                                         |                                         |
|--------------------------------------------------------------------------------------------------------------------------------|----------------|------------------------------------------|-----------------------------------------|-----------------------------------------|----------------|------------------------------------------|-----------------------------------------|-----------------------------------------|
|                                                                                                                                | R <sup>2</sup> | RMSE(MJm <sup>-2</sup> d <sup>-1</sup> ) | MAE(MJm <sup>-2</sup> d <sup>-1</sup> ) | MBE(MJm <sup>-2</sup> d <sup>-1</sup> ) | R <sup>2</sup> | RMSE(MJm <sup>-2</sup> d <sup>-1</sup> ) | MAE(MJm <sup>-2</sup> d <sup>-1</sup> ) | MBE(MJm <sup>-2</sup> d <sup>-1</sup> ) |
| <b><i>R<sub>e</sub> n/N (C1)</i></b>                                                                                           |                |                                          |                                         |                                         |                |                                          |                                         |                                         |
| XGBoost1                                                                                                                       | 0.915          | 2.052                                    | 1.457                                   | 0.000                                   | 0.901          | 2.211                                    | 1.581                                   | 0.055                                   |
| Catboost1                                                                                                                      | 0.911          | 2.095                                    | 1.479                                   | 0.000                                   | 0.903          | 2.187                                    | 1.555                                   | 0.048                                   |
| LightGBM1                                                                                                                      | 0.923          | 1.946                                    | 1.381                                   | 0.000                                   | 0.897          | 2.252                                    | 1.603                                   | 0.052                                   |
| CART1                                                                                                                          | 0.891          | 2.324                                    | 1.715                                   | 0.000                                   | 0.879          | 2.444                                    | 1.828                                   | 0.042                                   |
| ET1                                                                                                                            | 0.891          | 2.319                                    | 1.703                                   | 0.000                                   | 0.888          | 2.353                                    | 1.740                                   | 0.041                                   |
| RF1                                                                                                                            | 0.978          | 1.040                                    | 0.680                                   | 0.006                                   | 0.872          | 2.516                                    | 1.775                                   | 0.071                                   |
| GBDT1                                                                                                                          | 0.916          | 2.040                                    | 1.454                                   | 0.000                                   | 0.901          | 2.214                                    | 1.580                                   | 0.051                                   |
| MLP1                                                                                                                           | 0.899          | 2.235                                    | 1.611                                   | 0.090                                   | 0.897          | 2.252                                    | 1.635                                   | 0.129                                   |
| SVM-RBF1                                                                                                                       | 0.903          | 2.189                                    | 1.547                                   | -0.038                                  | 0.900          | 2.216                                    | 1.579                                   | 0.011                                   |
| <b><i>R<sub>e</sub> n/N T<sub>max</sub> T<sub>min</sub> (C2)</i></b>                                                           |                |                                          |                                         |                                         |                |                                          |                                         |                                         |
| XGBoost2                                                                                                                       | 0.925          | 1.931                                    | 1.372                                   | 0.000                                   | 0.909          | 2.114                                    | 1.512                                   | 0.055                                   |
| Catboost2                                                                                                                      | 0.928          | 1.881                                    | 1.336                                   | 0.000                                   | 0.914          | 2.059                                    | 1.463                                   | 0.058                                   |
| LightGBM2                                                                                                                      | 0.946          | 1.633                                    | 1.171                                   | 0.000                                   | 0.909          | 2.112                                    | 1.500                                   | 0.060                                   |
| CART2                                                                                                                          | 0.895          | 2.284                                    | 1.690                                   | 0.000                                   | 0.879          | 2.445                                    | 1.825                                   | 0.049                                   |
| ET2                                                                                                                            | 0.895          | 2.283                                    | 1.692                                   | 0.000                                   | 0.890          | 2.334                                    | 1.733                                   | 0.032                                   |
| RF2                                                                                                                            | 0.983          | 0.921                                    | 0.608                                   | 0.005                                   | 0.898          | 2.240                                    | 1.606                                   | 0.073                                   |
| GBDT2                                                                                                                          | 0.925          | 1.924                                    | 1.370                                   | 0.000                                   | 0.909          | 2.113                                    | 1.514                                   | 0.057                                   |
| MLP2                                                                                                                           | 0.906          | 2.156                                    | 1.526                                   | 0.024                                   | 0.901          | 2.208                                    | 1.576                                   | 0.062                                   |
| SVM-RBF2                                                                                                                       | 0.904          | 2.176                                    | 1.529                                   | -0.054                                  | 0.901          | 2.208                                    | 1.565                                   | -0.006                                  |
| <b><i>R<sub>e</sub> n/N H<sub>0</sub> U<sub>0</sub> (C3)</i></b>                                                               |                |                                          |                                         |                                         |                |                                          |                                         |                                         |
| XGBoost3                                                                                                                       | 0.925          | 1.926                                    | 1.381                                   | 0.000                                   | 0.910          | 2.110                                    | 1.521                                   | 0.060                                   |
| Catboost3                                                                                                                      | 0.926          | 1.911                                    | 1.364                                   | 0.000                                   | 0.912          | 2.084                                    | 1.497                                   | 0.065                                   |
| LightGBM3                                                                                                                      | 0.944          | 1.662                                    | 1.207                                   | 0.000                                   | 0.907          | 2.141                                    | 1.539                                   | 0.070                                   |
| CART3                                                                                                                          | 0.894          | 2.293                                    | 1.692                                   | 0.000                                   | 0.880          | 2.436                                    | 1.819                                   | 0.041                                   |
| ET3                                                                                                                            | 0.895          | 2.281                                    | 1.676                                   | 0.000                                   | 0.890          | 2.333                                    | 1.730                                   | 0.020                                   |
| RF3                                                                                                                            | 0.982          | 0.934                                    | 0.622                                   | 0.003                                   | 0.892          | 2.311                                    | 1.658                                   | 0.073                                   |
| GBDT3                                                                                                                          | 0.926          | 1.917                                    | 1.377                                   | 0.000                                   | 0.910          | 2.104                                    | 1.520                                   | 0.061                                   |
| MLP3                                                                                                                           | 0.909          | 2.122                                    | 1.522                                   | 0.019                                   | 0.906          | 2.150                                    | 1.557                                   | 0.076                                   |
| SVM-RBF                                                                                                                        | 0.910          | 2.116                                    | 1.504                                   | -0.053                                  | 0.907          | 2.140                                    | 1.538                                   | 0.001                                   |
| <b><i>R<sub>e</sub> n/N P<sub>re</sub> P<sub>rs</sub> (C4)</i></b>                                                             |                |                                          |                                         |                                         |                |                                          |                                         |                                         |
| XGBoost4                                                                                                                       | 0.928          | 1.890                                    | 1.356                                   | 0.000                                   | 0.913          | 2.071                                    | 1.490                                   | 0.046                                   |
| Catboost4                                                                                                                      | 0.928          | 1.882                                    | 1.342                                   | 0.000                                   | 0.916          | 2.040                                    | 1.456                                   | 0.054                                   |
| LightGBM4                                                                                                                      | 0.945          | 1.654                                    | 1.198                                   | 0.000                                   | 0.910          | 2.109                                    | 1.500                                   | 0.054                                   |
| CART4                                                                                                                          | 0.897          | 2.253                                    | 1.663                                   | 0.000                                   | 0.885          | 2.385                                    | 1.781                                   | 0.044                                   |
| ET4                                                                                                                            | 0.892          | 2.312                                    | 1.722                                   | 0.000                                   | 0.888          | 2.355                                    | 1.754                                   | 0.011                                   |
| RF4                                                                                                                            | 0.982          | 0.938                                    | 0.621                                   | 0.000                                   | 0.898          | 2.247                                    | 1.617                                   | 0.064                                   |
| GBDT4                                                                                                                          | 0.928          | 1.881                                    | 1.352                                   | 0.000                                   | 0.913          | 2.072                                    | 1.490                                   | 0.048                                   |
| MLP4                                                                                                                           | 0.908          | 2.129                                    | 1.531                                   | 0.004                                   | 0.906          | 2.158                                    | 1.565                                   | 0.046                                   |
| SVM-RBF4                                                                                                                       | 0.909          | 2.119                                    | 1.510                                   | -0.034                                  | 0.907          | 2.144                                    | 1.541                                   | 0.011                                   |
| <b><i>R<sub>e</sub> n/N T<sub>max</sub> T<sub>min</sub> H<sub>0</sub> U<sub>0</sub> (C5)</i></b>                               |                |                                          |                                         |                                         |                |                                          |                                         |                                         |
| XGBoost5                                                                                                                       | 0.931          | 1.843                                    | 1.327                                   | 0.000                                   | 0.915          | 2.047                                    | 1.483                                   | 0.061                                   |
| Catboost5                                                                                                                      | 0.937          | 1.765                                    | 1.268                                   | 0.000                                   | 0.920          | 1.990                                    | 1.433                                   | 0.073                                   |
| LightGBM5                                                                                                                      | 0.955          | 1.493                                    | 1.090                                   | 0.000                                   | 0.916          | 2.035                                    | 1.467                                   | 0.064                                   |
| CART5                                                                                                                          | 0.897          | 2.262                                    | 1.675                                   | 0.000                                   | 0.882          | 2.417                                    | 1.811                                   | 0.043                                   |
| ET5                                                                                                                            | 0.896          | 2.272                                    | 1.697                                   | 0.000                                   | 0.890          | 2.324                                    | 1.744                                   | 0.047                                   |
| RF5                                                                                                                            | 0.984          | 0.884                                    | 0.590                                   | 0.009                                   | 0.906          | 2.154                                    | 1.565                                   | 0.080                                   |
| GBDT5                                                                                                                          | 0.932          | 1.836                                    | 1.324                                   | 0.000                                   | 0.915          | 2.047                                    | 1.484                                   | 0.063                                   |
| MLP5                                                                                                                           | 0.914          | 2.066                                    | 1.472                                   | -0.005                                  | 0.911          | 2.094                                    | 1.503                                   | 0.049                                   |
| SVM-RBF5                                                                                                                       | 0.907          | 2.149                                    | 1.527                                   | -0.075                                  | 0.904          | 2.176                                    | 1.561                                   | -0.025                                  |
| <b><i>R<sub>e</sub> n/N T<sub>max</sub> T<sub>min</sub> P<sub>re</sub> P<sub>rs</sub> (C6)</i></b>                             |                |                                          |                                         |                                         |                |                                          |                                         |                                         |
| XGBoost6                                                                                                                       | 0.933          | 1.823                                    | 1.305                                   | 0.000                                   | 0.918          | 2.011                                    | 1.447                                   | 0.055                                   |
| Catboost6                                                                                                                      | 0.938          | 1.751                                    | 1.249                                   | 0.000                                   | 0.922          | 1.965                                    | 1.401                                   | 0.063                                   |
| LightGBM6                                                                                                                      | 0.955          | 1.493                                    | 1.080                                   | 0.000                                   | 0.918          | 2.012                                    | 1.434                                   | 0.062                                   |
| CART6                                                                                                                          | 0.899          | 2.233                                    | 1.656                                   | 0.000                                   | 0.885          | 2.383                                    | 1.785                                   | 0.042                                   |
| ET6                                                                                                                            | 0.894          | 2.285                                    | 1.698                                   | 0.000                                   | 0.890          | 2.334                                    | 1.746                                   | 0.039                                   |
| RF6                                                                                                                            | 0.984          | 0.882                                    | 0.584                                   | 0.009                                   | 0.907          | 2.144                                    | 1.535                                   | 0.078                                   |
| GBDT6                                                                                                                          | 0.934          | 1.809                                    | 1.301                                   | 0.000                                   | 0.917          | 2.021                                    | 1.454                                   | 0.052                                   |
| MLP6                                                                                                                           | 0.910          | 2.105                                    | 1.507                                   | -0.042                                  | 0.907          | 2.141                                    | 1.549                                   | 0.000                                   |
| SVM-RBF6                                                                                                                       | 0.906          | 2.152                                    | 1.529                                   | -0.065                                  | 0.903          | 2.183                                    | 1.564                                   | -0.022                                  |
| <b><i>R<sub>e</sub> n/N T<sub>max</sub> T<sub>min</sub> H<sub>0</sub> U<sub>0</sub> P<sub>re</sub> P<sub>rs</sub> (C7)</i></b> |                |                                          |                                         |                                         |                |                                          |                                         |                                         |
| XGBoost7                                                                                                                       | 0.935          | 1.792                                    | 1.293                                   | 0.000                                   | 0.918          | 2.012                                    | 1.455                                   | 0.057                                   |
| Catboost7                                                                                                                      | 0.941          | 1.703                                    | 1.228                                   | 0.000                                   | 0.922          | 1.961                                    | 1.406                                   | 0.072                                   |
| LightGBM7                                                                                                                      | 0.960          | 1.415                                    | 1.036                                   | 0.000                                   | 0.919          | 1.996                                    | 1.431                                   | 0.060                                   |
| CART7                                                                                                                          | 0.899          | 2.233                                    | 1.655                                   | 0.000                                   | 0.885          | 2.382                                    | 1.784                                   | 0.042                                   |
| ET7                                                                                                                            | 0.896          | 2.272                                    | 1.692                                   | 0.000                                   | 0.890          | 2.333                                    | 1.745                                   | 0.037                                   |
| RF7                                                                                                                            | 0.985          | 0.864                                    | 0.576                                   | 0.013                                   | 0.909          | 2.117                                    | 1.529                                   | 0.072                                   |
| GBDT7                                                                                                                          | 0.936          | 1.782                                    | 1.290                                   | 0.000                                   | 0.918          | 2.016                                    | 1.461                                   | 0.055                                   |
| MLP7                                                                                                                           | 0.913          | 2.077                                    | 1.502                                   | 0.094                                   | 0.909          | 2.125                                    | 1.557                                   | 0.147                                   |
| SVM-RBF7                                                                                                                       | 0.907          | 2.150                                    | 1.540                                   | -0.084                                  | 0.904          | 2.176                                    | 1.573                                   | -0.040                                  |



**Table S9** Same as Table S4 but at Zhengzhou station.

| Input/Model                                                                                                                    | Training       |                                          |                                         |                                         | Testing        |                                          |                                         |                                         |
|--------------------------------------------------------------------------------------------------------------------------------|----------------|------------------------------------------|-----------------------------------------|-----------------------------------------|----------------|------------------------------------------|-----------------------------------------|-----------------------------------------|
|                                                                                                                                | R <sup>2</sup> | RMSE(MJm <sup>-2</sup> d <sup>-1</sup> ) | MAE(MJm <sup>-2</sup> d <sup>-1</sup> ) | MBE(MJm <sup>-2</sup> d <sup>-1</sup> ) | R <sup>2</sup> | RMSE(MJm <sup>-2</sup> d <sup>-1</sup> ) | MAE(MJm <sup>-2</sup> d <sup>-1</sup> ) | MBE(MJm <sup>-2</sup> d <sup>-1</sup> ) |
| <b><i>R<sub>a</sub> n/N (C1)</i></b>                                                                                           |                |                                          |                                         |                                         |                |                                          |                                         |                                         |
| XGBoost1                                                                                                                       | 0.931          | 1.836                                    | 1.361                                   | 0.000                                   | 0.923          | 1.940                                    | 1.457                                   | 0.000                                   |
| Catboost1                                                                                                                      | 0.930          | 1.860                                    | 1.378                                   | 0.000                                   | 0.924          | 1.931                                    | 1.444                                   | -0.007                                  |
| LightGBM1                                                                                                                      | 0.937          | 1.754                                    | 1.291                                   | 0.000                                   | 0.920          | 1.984                                    | 1.480                                   | -0.005                                  |
| CART1                                                                                                                          | 0.910          | 2.108                                    | 1.634                                   | 0.000                                   | 0.900          | 2.217                                    | 1.721                                   | 0.022                                   |
| ET1                                                                                                                            | 0.914          | 2.058                                    | 1.568                                   | 0.000                                   | 0.912          | 2.080                                    | 1.595                                   | -0.009                                  |
| RF1                                                                                                                            | 0.983          | 0.921                                    | 0.628                                   | -0.005                                  | 0.897          | 2.248                                    | 1.657                                   | -0.006                                  |
| GBDT1                                                                                                                          | 0.932          | 1.829                                    | 1.358                                   | 0.000                                   | 0.923          | 1.943                                    | 1.459                                   | -0.001                                  |
| MLP1                                                                                                                           | 0.918          | 2.004                                    | 1.498                                   | -0.029                                  | 0.916          | 2.034                                    | 1.530                                   | -0.034                                  |
| SVM-RBF1                                                                                                                       | 0.908          | 2.122                                    | 1.571                                   | -0.048                                  | 0.906          | 2.147                                    | 1.598                                   | -0.051                                  |
| <b><i>R<sub>a</sub> n/N T<sub>max</sub> T<sub>min</sub> (C2)</i></b>                                                           |                |                                          |                                         |                                         |                |                                          |                                         |                                         |
| XGBoost2                                                                                                                       | 0.940          | 1.714                                    | 1.278                                   | 0.000                                   | 0.931          | 1.847                                    | 1.394                                   | -0.002                                  |
| Catboost2                                                                                                                      | 0.944          | 1.661                                    | 1.235                                   | 0.000                                   | 0.934          | 1.803                                    | 1.350                                   | -0.006                                  |
| LightGBM2                                                                                                                      | 0.957          | 1.456                                    | 1.092                                   | 0.000                                   | 0.931          | 1.839                                    | 1.376                                   | -0.011                                  |
| CART2                                                                                                                          | 0.914          | 2.052                                    | 1.603                                   | 0.000                                   | 0.904          | 2.174                                    | 1.695                                   | 0.021                                   |
| ET2                                                                                                                            | 0.916          | 2.032                                    | 1.575                                   | 0.000                                   | 0.912          | 2.074                                    | 1.612                                   | 0.002                                   |
| RF2                                                                                                                            | 0.987          | 0.805                                    | 0.554                                   | -0.008                                  | 0.922          | 1.957                                    | 1.459                                   | -0.018                                  |
| GBDT2                                                                                                                          | 0.941          | 1.708                                    | 1.274                                   | 0.000                                   | 0.931          | 1.844                                    | 1.391                                   | -0.006                                  |
| MLP2                                                                                                                           | 0.922          | 1.953                                    | 1.464                                   | -0.036                                  | 0.920          | 1.976                                    | 1.489                                   | -0.050                                  |
| SVM-RBF2                                                                                                                       | 0.911          | 2.090                                    | 1.541                                   | -0.090                                  | 0.908          | 2.120                                    | 1.573                                   | -0.096                                  |
| <b><i>R<sub>a</sub> n/N H<sub>0</sub> U<sub>0</sub> (C3)</i></b>                                                               |                |                                          |                                         |                                         |                |                                          |                                         |                                         |
| XGBoost3                                                                                                                       | 0.945          | 1.652                                    | 1.227                                   | 0.000                                   | 0.935          | 1.784                                    | 1.337                                   | 0.016                                   |
| Catboost3                                                                                                                      | 0.945          | 1.647                                    | 1.222                                   | 0.000                                   | 0.937          | 1.756                                    | 1.315                                   | 0.015                                   |
| LightGBM3                                                                                                                      | 0.957          | 1.450                                    | 1.082                                   | 0.000                                   | 0.933          | 1.816                                    | 1.357                                   | 0.010                                   |
| CART3                                                                                                                          | 0.918          | 2.013                                    | 1.565                                   | 0.000                                   | 0.908          | 2.127                                    | 1.649                                   | 0.032                                   |
| ET3                                                                                                                            | 0.917          | 2.022                                    | 1.550                                   | 0.000                                   | 0.914          | 2.050                                    | 1.582                                   | -0.006                                  |
| RF3                                                                                                                            | 0.987          | 0.795                                    | 0.546                                   | -0.004                                  | 0.923          | 1.950                                    | 1.440                                   | -0.003                                  |
| GBDT3                                                                                                                          | 0.945          | 1.649                                    | 1.226                                   | 0.000                                   | 0.935          | 1.785                                    | 1.340                                   | 0.012                                   |
| MLP3                                                                                                                           | 0.929          | 1.866                                    | 1.395                                   | 0.060                                   | 0.928          | 1.885                                    | 1.419                                   | 0.062                                   |
| SVM-RBF                                                                                                                        | 0.918          | 2.006                                    | 1.481                                   | -0.042                                  | 0.917          | 2.015                                    | 1.498                                   | -0.039                                  |
| <b><i>R<sub>a</sub> n/N P<sub>re</sub> P<sub>rs</sub> (C4)</i></b>                                                             |                |                                          |                                         |                                         |                |                                          |                                         |                                         |
| XGBoost4                                                                                                                       | 0.948          | 1.596                                    | 1.205                                   | 0.000                                   | 0.940          | 1.720                                    | 1.308                                   | 0.001                                   |
| Catboost4                                                                                                                      | 0.948          | 1.593                                    | 1.203                                   | 0.000                                   | 0.941          | 1.705                                    | 1.290                                   | 0.000                                   |
| LightGBM4                                                                                                                      | 0.959          | 1.415                                    | 1.072                                   | 0.000                                   | 0.938          | 1.739                                    | 1.313                                   | -0.009                                  |
| CART4                                                                                                                          | 0.922          | 1.959                                    | 1.529                                   | 0.000                                   | 0.913          | 2.071                                    | 1.618                                   | 0.016                                   |
| ET4                                                                                                                            | 0.916          | 2.028                                    | 1.566                                   | 0.000                                   | 0.914          | 2.055                                    | 1.586                                   | -0.014                                  |
| RF4                                                                                                                            | 0.988          | 0.775                                    | 0.539                                   | 0.001                                   | 0.928          | 1.878                                    | 1.421                                   | -0.007                                  |
| GBDT4                                                                                                                          | 0.949          | 1.588                                    | 1.201                                   | 0.000                                   | 0.940          | 1.721                                    | 1.308                                   | 0.000                                   |
| MLP4                                                                                                                           | 0.928          | 1.884                                    | 1.423                                   | -0.081                                  | 0.926          | 1.896                                    | 1.433                                   | -0.082                                  |
| SVM-RBF4                                                                                                                       | 0.915          | 2.046                                    | 1.524                                   | -0.047                                  | 0.913          | 2.072                                    | 1.551                                   | -0.050                                  |
| <b><i>R<sub>a</sub> n/N T<sub>max</sub> T<sub>min</sub> H<sub>0</sub> U<sub>0</sub> (C5)</i></b>                               |                |                                          |                                         |                                         |                |                                          |                                         |                                         |
| XGBoost5                                                                                                                       | 0.949          | 1.592                                    | 1.187                                   | 0.000                                   | 0.938          | 1.741                                    | 1.312                                   | 0.008                                   |
| Catboost5                                                                                                                      | 0.952          | 1.544                                    | 1.151                                   | 0.000                                   | 0.941          | 1.705                                    | 1.280                                   | 0.006                                   |
| LightGBM5                                                                                                                      | 0.966          | 1.294                                    | 0.975                                   | 0.000                                   | 0.939          | 1.728                                    | 1.294                                   | -0.007                                  |
| CART5                                                                                                                          | 0.920          | 1.989                                    | 1.554                                   | 0.000                                   | 0.907          | 2.135                                    | 1.658                                   | 0.026                                   |
| ET5                                                                                                                            | 0.922          | 1.963                                    | 1.520                                   | 0.000                                   | 0.919          | 1.996                                    | 1.547                                   | 0.002                                   |
| RF5                                                                                                                            | 0.988          | 0.759                                    | 0.524                                   | -0.001                                  | 0.931          | 1.845                                    | 1.371                                   | -0.003                                  |
| GBDT5                                                                                                                          | 0.949          | 1.589                                    | 1.186                                   | 0.000                                   | 0.938          | 1.744                                    | 1.315                                   | 0.004                                   |
| MLP5                                                                                                                           | 0.933          | 1.811                                    | 1.353                                   | 0.018                                   | 0.931          | 1.845                                    | 1.393                                   | 0.007                                   |
| SVM-RBF5                                                                                                                       | 0.917          | 2.019                                    | 1.488                                   | -0.077                                  | 0.915          | 2.036                                    | 1.512                                   | -0.082                                  |
| <b><i>R<sub>a</sub> n/N T<sub>max</sub> T<sub>min</sub> P<sub>re</sub> P<sub>rs</sub> (C6)</i></b>                             |                |                                          |                                         |                                         |                |                                          |                                         |                                         |
| XGBoost6                                                                                                                       | 0.952          | 1.540                                    | 1.166                                   | 0.000                                   | 0.943          | 1.678                                    | 1.278                                   | -0.002                                  |
| Catboost6                                                                                                                      | 0.954          | 1.511                                    | 1.144                                   | 0.000                                   | 0.945          | 1.650                                    | 1.252                                   | -0.001                                  |
| LightGBM6                                                                                                                      | 0.967          | 1.276                                    | 0.971                                   | 0.000                                   | 0.943          | 1.671                                    | 1.264                                   | -0.011                                  |
| CART6                                                                                                                          | 0.923          | 1.943                                    | 1.525                                   | 0.000                                   | 0.912          | 2.073                                    | 1.621                                   | 0.026                                   |
| ET6                                                                                                                            | 0.917          | 2.022                                    | 1.578                                   | 0.000                                   | 0.914          | 2.055                                    | 1.607                                   | 0.000                                   |
| RF6                                                                                                                            | 0.989          | 0.739                                    | 0.515                                   | -0.001                                  | 0.935          | 1.781                                    | 1.347                                   | -0.007                                  |
| GBDT6                                                                                                                          | 0.952          | 1.534                                    | 1.163                                   | 0.000                                   | 0.942          | 1.681                                    | 1.281                                   | -0.004                                  |
| MLP6                                                                                                                           | 0.931          | 1.840                                    | 1.389                                   | -0.027                                  | 0.927          | 1.887                                    | 1.432                                   | -0.037                                  |
| SVM-RBF6                                                                                                                       | 0.915          | 2.046                                    | 1.523                                   | -0.078                                  | 0.912          | 2.077                                    | 1.556                                   | -0.085                                  |
| <b><i>R<sub>a</sub> n/N T<sub>max</sub> T<sub>min</sub> H<sub>0</sub> U<sub>0</sub> P<sub>re</sub> P<sub>rs</sub> (C7)</i></b> |                |                                          |                                         |                                         |                |                                          |                                         |                                         |
| XGBoost7                                                                                                                       | 0.954          | 1.508                                    | 1.134                                   | 0.000                                   | 0.944          | 1.655                                    | 1.257                                   | -0.002                                  |
| Catboost7                                                                                                                      | 0.957          | 1.459                                    | 1.099                                   | 0.000                                   | 0.947          | 1.615                                    | 1.223                                   | -0.005                                  |
| LightGBM7                                                                                                                      | 0.971          | 1.190                                    | 0.908                                   | 0.000                                   | 0.945          | 1.644                                    | 1.241                                   | -0.014                                  |
| CART7                                                                                                                          | 0.923          | 1.942                                    | 1.524                                   | 0.000                                   | 0.912          | 2.074                                    | 1.622                                   | 0.022                                   |
| ET7                                                                                                                            | 0.921          | 1.967                                    | 1.527                                   | 0.000                                   | 0.917          | 2.022                                    | 1.571                                   | 0.002                                   |
| RF7                                                                                                                            | 0.990          | 0.716                                    | 0.499                                   | -0.002                                  | 0.938          | 1.741                                    | 1.315                                   | -0.018                                  |
| GBDT7                                                                                                                          | 0.954          | 1.503                                    | 1.132                                   | 0.000                                   | 0.944          | 1.656                                    | 1.259                                   | -0.007                                  |
| MLP7                                                                                                                           | 0.936          | 1.781                                    | 1.330                                   | -0.014                                  | 0.934          | 1.800                                    | 1.349                                   | -0.021                                  |
| SVM-RBF7                                                                                                                       | 0.917          | 2.019                                    | 1.494                                   | -0.078                                  | 0.915          | 2.038                                    | 1.520                                   | -0.085                                  |

**Table S10** Same as Table S4 but at Beijing station.

| Input/Model                                                                                                                    | Training       |                                          |                                         |                                         | Testing        |                                          |                                         |                                         |
|--------------------------------------------------------------------------------------------------------------------------------|----------------|------------------------------------------|-----------------------------------------|-----------------------------------------|----------------|------------------------------------------|-----------------------------------------|-----------------------------------------|
|                                                                                                                                | R <sup>2</sup> | RMSE(MJm <sup>-2</sup> d <sup>-1</sup> ) | MAE(MJm <sup>-2</sup> d <sup>-1</sup> ) | MBE(MJm <sup>-2</sup> d <sup>-1</sup> ) | R <sup>2</sup> | RMSE(MJm <sup>-2</sup> d <sup>-1</sup> ) | MAE(MJm <sup>-2</sup> d <sup>-1</sup> ) | MBE(MJm <sup>-2</sup> d <sup>-1</sup> ) |
| <b><i>R<sub>a</sub> n/N (C1)</i></b>                                                                                           |                |                                          |                                         |                                         |                |                                          |                                         |                                         |
| XGBoost1                                                                                                                       | 0.939          | 1.748                                    | 1.252                                   | 0.000                                   | 0.928          | 1.892                                    | 1.360                                   | -0.009                                  |
| Catboost1                                                                                                                      | 0.936          | 1.777                                    | 1.272                                   | 0.000                                   | 0.929          | 1.873                                    | 1.339                                   | -0.011                                  |
| LightGBM1                                                                                                                      | 0.945          | 1.655                                    | 1.183                                   | 0.000                                   | 0.924          | 1.939                                    | 1.384                                   | -0.014                                  |
| CART1                                                                                                                          | 0.911          | 2.099                                    | 1.596                                   | 0.000                                   | 0.899          | 2.245                                    | 1.707                                   | -0.015                                  |
| ET1                                                                                                                            | 0.909          | 2.123                                    | 1.624                                   | 0.000                                   | 0.905          | 2.175                                    | 1.669                                   | -0.005                                  |
| RF1                                                                                                                            | 0.984          | 0.896                                    | 0.584                                   | 0.002                                   | 0.902          | 2.203                                    | 1.552                                   | -0.010                                  |
| GBDT1                                                                                                                          | 0.939          | 1.744                                    | 1.252                                   | 0.000                                   | 0.928          | 1.896                                    | 1.363                                   | -0.011                                  |
| MLP1                                                                                                                           | 0.922          | 1.972                                    | 1.463                                   | -0.020                                  | 0.919          | 2.009                                    | 1.488                                   | -0.039                                  |
| SVM-RBF1                                                                                                                       | 0.926          | 1.921                                    | 1.386                                   | -0.115                                  | 0.923          | 1.957                                    | 1.414                                   | -0.130                                  |
| <b><i>R<sub>a</sub> n/N T<sub>max</sub> T<sub>min</sub> (C2)</i></b>                                                           |                |                                          |                                         |                                         |                |                                          |                                         |                                         |
| XGBoost2                                                                                                                       | 0.947          | 1.628                                    | 1.180                                   | 0.000                                   | 0.936          | 1.782                                    | 1.296                                   | -0.009                                  |
| Catboost2                                                                                                                      | 0.951          | 1.562                                    | 1.134                                   | 0.000                                   | 0.940          | 1.724                                    | 1.239                                   | -0.010                                  |
| LightGBM2                                                                                                                      | 0.963          | 1.358                                    | 0.996                                   | 0.000                                   | 0.937          | 1.766                                    | 1.268                                   | -0.012                                  |
| CART2                                                                                                                          | 0.916          | 2.038                                    | 1.565                                   | 0.000                                   | 0.905          | 2.178                                    | 1.669                                   | -0.020                                  |
| ET2                                                                                                                            | 0.914          | 2.062                                    | 1.596                                   | 0.000                                   | 0.911          | 2.099                                    | 1.623                                   | -0.017                                  |
| RF2                                                                                                                            | 0.988          | 0.771                                    | 0.513                                   | 0.006                                   | 0.929          | 1.874                                    | 1.345                                   | 0.008                                   |
| GBDT2                                                                                                                          | 0.947          | 1.621                                    | 1.176                                   | 0.000                                   | 0.936          | 1.780                                    | 1.294                                   | -0.014                                  |
| MLP2                                                                                                                           | 0.925          | 1.927                                    | 1.425                                   | 0.052                                   | 0.923          | 1.952                                    | 1.440                                   | 0.042                                   |
| SVM-RBF2                                                                                                                       | 0.926          | 1.923                                    | 1.372                                   | -0.127                                  | 0.922          | 1.963                                    | 1.405                                   | -0.142                                  |
| <b><i>R<sub>a</sub> n/N H<sub>0</sub> U<sub>0</sub> (C3)</i></b>                                                               |                |                                          |                                         |                                         |                |                                          |                                         |                                         |
| XGBoost3                                                                                                                       | 0.948          | 1.601                                    | 1.144                                   | 0.000                                   | 0.939          | 1.745                                    | 1.255                                   | 0.003                                   |
| Catboost3                                                                                                                      | 0.949          | 1.585                                    | 1.133                                   | 0.000                                   | 0.941          | 1.711                                    | 1.223                                   | 0.003                                   |
| LightGBM3                                                                                                                      | 0.962          | 1.366                                    | 0.990                                   | 0.000                                   | 0.936          | 1.779                                    | 1.264                                   | -0.015                                  |
| CART3                                                                                                                          | 0.915          | 2.053                                    | 1.564                                   | 0.000                                   | 0.903          | 2.195                                    | 1.671                                   | -0.010                                  |
| ET3                                                                                                                            | 0.918          | 2.014                                    | 1.528                                   | 0.000                                   | 0.914          | 2.063                                    | 1.560                                   | -0.008                                  |
| RF3                                                                                                                            | 0.988          | 0.774                                    | 0.512                                   | 0.003                                   | 0.928          | 1.891                                    | 1.354                                   | -0.002                                  |
| GBDT3                                                                                                                          | 0.949          | 1.597                                    | 1.142                                   | 0.000                                   | 0.939          | 1.744                                    | 1.257                                   | 0.000                                   |
| MLP3                                                                                                                           | 0.931          | 1.853                                    | 1.353                                   | 0.021                                   | 0.929          | 1.885                                    | 1.380                                   | 0.016                                   |
| SVM-RBF3                                                                                                                       | 0.931          | 1.846                                    | 1.320                                   | -0.109                                  | 0.929          | 1.873                                    | 1.348                                   | -0.110                                  |
| <b><i>R<sub>a</sub> n/N P<sub>re</sub> P<sub>rs</sub> (C4)</i></b>                                                             |                |                                          |                                         |                                         |                |                                          |                                         |                                         |
| XGBoost4                                                                                                                       | 0.950          | 1.573                                    | 1.151                                   | 0.000                                   | 0.940          | 1.731                                    | 1.266                                   | -0.014                                  |
| Catboost4                                                                                                                      | 0.951          | 1.559                                    | 1.137                                   | 0.000                                   | 0.942          | 1.699                                    | 1.232                                   | -0.013                                  |
| LightGBM4                                                                                                                      | 0.963          | 1.350                                    | 1.001                                   | 0.000                                   | 0.938          | 1.757                                    | 1.270                                   | -0.017                                  |
| CART4                                                                                                                          | 0.918          | 2.016                                    | 1.543                                   | 0.000                                   | 0.906          | 2.164                                    | 1.652                                   | -0.013                                  |
| ET4                                                                                                                            | 0.916          | 2.043                                    | 1.566                                   | 0.000                                   | 0.912          | 2.096                                    | 1.607                                   | 0.001                                   |
| RF4                                                                                                                            | 0.988          | 0.769                                    | 0.516                                   | 0.001                                   | 0.930          | 1.871                                    | 1.357                                   | -0.007                                  |
| GBDT4                                                                                                                          | 0.950          | 1.572                                    | 1.152                                   | 0.000                                   | 0.940          | 1.732                                    | 1.270                                   | -0.013                                  |
| MLP4                                                                                                                           | 0.926          | 1.913                                    | 1.428                                   | -0.030                                  | 0.923          | 1.962                                    | 1.462                                   | -0.053                                  |
| SVM-RBF4                                                                                                                       | 0.927          | 1.901                                    | 1.370                                   | -0.117                                  | 0.924          | 1.940                                    | 1.401                                   | -0.135                                  |
| <b><i>R<sub>a</sub> n/N T<sub>max</sub> T<sub>min</sub> H<sub>0</sub> U<sub>0</sub> (C5)</i></b>                               |                |                                          |                                         |                                         |                |                                          |                                         |                                         |
| XGBoost5                                                                                                                       | 0.953          | 1.535                                    | 1.114                                   | 0.000                                   | 0.942          | 1.694                                    | 1.237                                   | 0.001                                   |
| Catboost5                                                                                                                      | 0.957          | 1.456                                    | 1.063                                   | 0.000                                   | 0.946          | 1.636                                    | 1.191                                   | 0.002                                   |
| LightGBM5                                                                                                                      | 0.970          | 1.215                                    | 0.900                                   | 0.000                                   | 0.944          | 1.661                                    | 1.202                                   | -0.006                                  |
| CART5                                                                                                                          | 0.919          | 2.011                                    | 1.544                                   | 0.000                                   | 0.905          | 2.169                                    | 1.663                                   | -0.017                                  |
| ET5                                                                                                                            | 0.919          | 2.002                                    | 1.544                                   | 0.000                                   | 0.915          | 2.054                                    | 1.588                                   | 0.009                                   |
| RF5                                                                                                                            | 0.989          | 0.724                                    | 0.489                                   | -0.004                                  | 0.937          | 1.773                                    | 1.284                                   | -0.004                                  |
| GBDT5                                                                                                                          | 0.953          | 1.533                                    | 1.113                                   | 0.000                                   | 0.942          | 1.693                                    | 1.236                                   | 0.007                                   |
| MLP5                                                                                                                           | 0.932          | 1.837                                    | 1.348                                   | 0.012                                   | 0.929          | 1.872                                    | 1.384                                   | 0.003                                   |
| SVM-RBF5                                                                                                                       | 0.929          | 1.884                                    | 1.346                                   | -0.123                                  | 0.926          | 1.918                                    | 1.380                                   | -0.124                                  |
| <b><i>R<sub>a</sub> n/N T<sub>max</sub> T<sub>min</sub> P<sub>re</sub> P<sub>rs</sub> (C6)</i></b>                             |                |                                          |                                         |                                         |                |                                          |                                         |                                         |
| XGBoost6                                                                                                                       | 0.954          | 1.504                                    | 1.112                                   | 0.000                                   | 0.944          | 1.673                                    | 1.237                                   | -0.011                                  |
| Catboost6                                                                                                                      | 0.959          | 1.434                                    | 1.061                                   | 0.000                                   | 0.948          | 1.613                                    | 1.184                                   | -0.014                                  |
| LightGBM6                                                                                                                      | 0.971          | 1.206                                    | 0.906                                   | 0.000                                   | 0.946          | 1.639                                    | 1.202                                   | -0.015                                  |
| CART6                                                                                                                          | 0.921          | 1.982                                    | 1.526                                   | 0.000                                   | 0.908          | 2.139                                    | 1.643                                   | -0.022                                  |
| ET6                                                                                                                            | 0.910          | 2.112                                    | 1.647                                   | 0.000                                   | 0.906          | 2.164                                    | 1.682                                   | -0.017                                  |
| RF6                                                                                                                            | 0.990          | 0.712                                    | 0.487                                   | 0.004                                   | 0.938          | 1.748                                    | 1.278                                   | -0.005                                  |
| GBDT6                                                                                                                          | 0.955          | 1.498                                    | 1.110                                   | 0.000                                   | 0.944          | 1.667                                    | 1.232                                   | -0.012                                  |
| MLP6                                                                                                                           | 0.929          | 1.871                                    | 1.393                                   | 0.030                                   | 0.927          | 1.907                                    | 1.418                                   | 0.024                                   |
| SVM-RBF6                                                                                                                       | 0.924          | 1.946                                    | 1.393                                   | -0.123                                  | 0.920          | 1.990                                    | 1.428                                   | -0.141                                  |
| <b><i>R<sub>a</sub> n/N T<sub>max</sub> T<sub>min</sub> H<sub>0</sub> U<sub>0</sub> P<sub>re</sub> P<sub>rs</sub> (C7)</i></b> |                |                                          |                                         |                                         |                |                                          |                                         |                                         |
| XGBoost7                                                                                                                       | 0.957          | 1.468                                    | 1.078                                   | 0.000                                   | 0.946          | 1.638                                    | 1.203                                   | 0.000                                   |
| Catboost7                                                                                                                      | 0.962          | 1.373                                    | 1.012                                   | 0.000                                   | 0.951          | 1.566                                    | 1.148                                   | -0.002                                  |
| LightGBM7                                                                                                                      | 0.974          | 1.126                                    | 0.846                                   | 0.000                                   | 0.949          | 1.589                                    | 1.162                                   | -0.009                                  |
| CART7                                                                                                                          | 0.921          | 1.982                                    | 1.525                                   | 0.000                                   | 0.908          | 2.142                                    | 1.645                                   | -0.022                                  |
| ET7                                                                                                                            | 0.919          | 2.005                                    | 1.552                                   | 0.000                                   | 0.916          | 2.042                                    | 1.579                                   | 0.004                                   |
| RF7                                                                                                                            | 0.990          | 0.694                                    | 0.471                                   | 0.002                                   | 0.942          | 1.700                                    | 1.241                                   | 0.006                                   |
| GBDT7                                                                                                                          | 0.957          | 1.460                                    | 1.074                                   | 0.000                                   | 0.946          | 1.632                                    | 1.199                                   | -0.003                                  |
| MLP7                                                                                                                           | 0.932          | 1.839                                    | 1.362                                   | -0.054                                  | 0.928          | 1.887                                    | 1.403                                   | -0.067                                  |
| SVM-RBF7                                                                                                                       | 0.926          | 1.919                                    | 1.371                                   | -0.116                                  | 0.923          | 1.954                                    | 1.406                                   | -0.120                                  |

**Table S11** Same as Table S4 but at Lanzhou station.

| Input/Model                                                            | Training       |                                          |                                         |                                         | Testing        |                                          |                                         |                                         |
|------------------------------------------------------------------------|----------------|------------------------------------------|-----------------------------------------|-----------------------------------------|----------------|------------------------------------------|-----------------------------------------|-----------------------------------------|
|                                                                        | R <sup>2</sup> | RMSE(MJm <sup>-2</sup> d <sup>-1</sup> ) | MAE(MJm <sup>-2</sup> d <sup>-1</sup> ) | MBE(MJm <sup>-2</sup> d <sup>-1</sup> ) | R <sup>2</sup> | RMSE(MJm <sup>-2</sup> d <sup>-1</sup> ) | MAE(MJm <sup>-2</sup> d <sup>-1</sup> ) | MBE(MJm <sup>-2</sup> d <sup>-1</sup> ) |
| <b><math>R_a n/N</math> (C1)</b>                                       |                |                                          |                                         |                                         |                |                                          |                                         |                                         |
| XGBoost1                                                               | 0.922          | 2.063                                    | 1.624                                   | 0.000                                   | 0.893          | 2.382                                    | 1.951                                   | -0.075                                  |
| Catboost1                                                              | 0.919          | 2.105                                    | 1.656                                   | 0.000                                   | 0.894          | 2.371                                    | 1.943                                   | -0.077                                  |
| LightGBM1                                                              | 0.930          | 1.951                                    | 1.536                                   | 0.000                                   | 0.890          | 2.419                                    | 1.975                                   | -0.082                                  |
| CART1                                                                  | 0.903          | 2.299                                    | 1.811                                   | 0.000                                   | 0.873          | 2.599                                    | 2.104                                   | -0.079                                  |
| ET1                                                                    | 0.899          | 2.339                                    | 1.856                                   | 0.000                                   | 0.879          | 2.540                                    | 2.075                                   | -0.082                                  |
| RF1                                                                    | 0.981          | 1.026                                    | 0.744                                   | -0.001                                  | 0.869          | 2.639                                    | 2.110                                   | -0.088                                  |
| GBDT1                                                                  | 0.922          | 2.057                                    | 1.620                                   | 0.000                                   | 0.893          | 2.382                                    | 1.951                                   | -0.077                                  |
| MLP1                                                                   | 0.908          | 2.243                                    | 1.769                                   | -0.054                                  | 0.890          | 2.422                                    | 1.976                                   | -0.132                                  |
| SVM-RBF1                                                               | 0.909          | 2.222                                    | 1.724                                   | -0.101                                  | 0.879          | 2.530                                    | 2.100                                   | -0.181                                  |
| <b><math>R_a n/N T_{max} T_{min}</math> (C2)</b>                       |                |                                          |                                         |                                         |                |                                          |                                         |                                         |
| XGBoost2                                                               | 0.925          | 2.026                                    | 1.594                                   | 0.000                                   | 0.894          | 2.373                                    | 1.946                                   | -0.070                                  |
| Catboost2                                                              | 0.925          | 2.022                                    | 1.593                                   | 0.000                                   | 0.896          | 2.351                                    | 1.934                                   | -0.075                                  |
| LightGBM2                                                              | 0.942          | 1.774                                    | 1.399                                   | 0.000                                   | 0.892          | 2.396                                    | 1.962                                   | -0.082                                  |
| CART2                                                                  | 0.890          | 2.443                                    | 1.910                                   | 0.000                                   | 0.859          | 2.746                                    | 2.196                                   | -0.075                                  |
| ET2                                                                    | 0.902          | 2.314                                    | 1.835                                   | 0.000                                   | 0.880          | 2.525                                    | 2.063                                   | -0.072                                  |
| RF2                                                                    | 0.983          | 0.960                                    | 0.700                                   | 0.009                                   | 0.879          | 2.538                                    | 2.052                                   | -0.073                                  |
| GBDT2                                                                  | 0.925          | 2.021                                    | 1.590                                   | 0.000                                   | 0.894          | 2.373                                    | 1.947                                   | -0.074                                  |
| MLP2                                                                   | 0.909          | 2.231                                    | 1.760                                   | -0.023                                  | 0.888          | 2.443                                    | 1.998                                   | -0.099                                  |
| SVM-RBF2                                                               | 0.909          | 2.224                                    | 1.723                                   | -0.123                                  | 0.879          | 2.533                                    | 2.105                                   | -0.202                                  |
| <b><math>R_a n/N H_0 U_0</math> (C3)</b>                               |                |                                          |                                         |                                         |                |                                          |                                         |                                         |
| XGBoost3                                                               | 0.930          | 1.954                                    | 1.531                                   | 0.000                                   | 0.902          | 2.290                                    | 1.863                                   | -0.079                                  |
| Catboost3                                                              | 0.929          | 1.970                                    | 1.543                                   | 0.000                                   | 0.902          | 2.284                                    | 1.860                                   | -0.066                                  |
| LightGBM3                                                              | 0.945          | 1.726                                    | 1.343                                   | 0.000                                   | 0.901          | 2.292                                    | 1.841                                   | -0.093                                  |
| CART3                                                                  | 0.905          | 2.271                                    | 1.792                                   | 0.000                                   | 0.876          | 2.574                                    | 2.087                                   | -0.081                                  |
| ET3                                                                    | 0.906          | 2.266                                    | 1.802                                   | 0.000                                   | 0.885          | 2.480                                    | 2.023                                   | -0.080                                  |
| RF3                                                                    | 0.984          | 0.946                                    | 0.687                                   | 0.001                                   | 0.885          | 2.473                                    | 1.989                                   | -0.070                                  |
| GBDT3                                                                  | 0.930          | 1.949                                    | 1.527                                   | 0.000                                   | 0.902          | 2.285                                    | 1.859                                   | -0.081                                  |
| MLP3                                                                   | 0.911          | 2.197                                    | 1.738                                   | 0.013                                   | 0.890          | 2.414                                    | 1.985                                   | -0.070                                  |
| SVM-RBF                                                                | 0.914          | 2.164                                    | 1.688                                   | -0.089                                  | 0.883          | 2.489                                    | 2.077                                   | -0.180                                  |
| <b><math>R_a n/N P_{re} P_{rs}</math> (C4)</b>                         |                |                                          |                                         |                                         |                |                                          |                                         |                                         |
| XGBoost4                                                               | 0.927          | 1.995                                    | 1.578                                   | 0.000                                   | 0.897          | 2.341                                    | 1.923                                   | -0.081                                  |
| Catboost4                                                              | 0.925          | 2.019                                    | 1.596                                   | 0.000                                   | 0.898          | 2.332                                    | 1.914                                   | -0.073                                  |
| LightGBM4                                                              | 0.942          | 1.779                                    | 1.414                                   | 0.000                                   | 0.894          | 2.376                                    | 1.945                                   | -0.080                                  |
| CART4                                                                  | 0.905          | 2.269                                    | 1.790                                   | 0.000                                   | 0.876          | 2.574                                    | 2.085                                   | -0.076                                  |
| ET4                                                                    | 0.902          | 2.310                                    | 1.840                                   | 0.000                                   | 0.882          | 2.510                                    | 2.037                                   | -0.073                                  |
| RF4                                                                    | 0.983          | 0.970                                    | 0.709                                   | 0.010                                   | 0.881          | 2.517                                    | 2.033                                   | -0.069                                  |
| GBDT4                                                                  | 0.927          | 1.991                                    | 1.578                                   | 0.000                                   | 0.897          | 2.344                                    | 1.926                                   | -0.077                                  |
| MLP4                                                                   | 0.908          | 2.233                                    | 1.776                                   | 0.014                                   | 0.891          | 2.407                                    | 1.957                                   | -0.064                                  |
| SVM-RBF4                                                               | 0.911          | 2.196                                    | 1.713                                   | -0.119                                  | 0.882          | 2.504                                    | 2.085                                   | -0.199                                  |
| <b><math>R_a n/N T_{max} T_{min} H_0 U_0</math> (C5)</b>               |                |                                          |                                         |                                         |                |                                          |                                         |                                         |
| XGBoost5                                                               | 0.930          | 1.947                                    | 1.528                                   | 0.000                                   | 0.899          | 2.316                                    | 1.892                                   | -0.078                                  |
| Catboost5                                                              | 0.932          | 1.917                                    | 1.501                                   | 0.000                                   | 0.902          | 2.286                                    | 1.867                                   | -0.069                                  |
| LightGBM5                                                              | 0.951          | 1.638                                    | 1.278                                   | 0.000                                   | 0.901          | 2.298                                    | 1.860                                   | -0.091                                  |
| CART5                                                                  | 0.892          | 2.424                                    | 1.895                                   | 0.000                                   | 0.861          | 2.723                                    | 2.176                                   | -0.074                                  |
| ET5                                                                    | 0.902          | 2.304                                    | 1.827                                   | 0.000                                   | 0.880          | 2.529                                    | 2.067                                   | -0.080                                  |
| RF5                                                                    | 0.984          | 0.925                                    | 0.673                                   | 0.008                                   | 0.886          | 2.468                                    | 1.996                                   | -0.083                                  |
| GBDT5                                                                  | 0.931          | 1.943                                    | 1.526                                   | 0.000                                   | 0.899          | 2.315                                    | 1.890                                   | -0.083                                  |
| MLP5                                                                   | 0.913          | 2.181                                    | 1.721                                   | 0.088                                   | 0.892          | 2.401                                    | 1.975                                   | 0.010                                   |
| SVM-RBF5                                                               | 0.911          | 2.200                                    | 1.717                                   | -0.098                                  | 0.881          | 2.511                                    | 2.090                                   | -0.185                                  |
| <b><math>R_a n/N T_{max} T_{min} P_{re} P_{rs}</math> (C6)</b>         |                |                                          |                                         |                                         |                |                                          |                                         |                                         |
| XGBoost6                                                               | 0.929          | 1.969                                    | 1.558                                   | 0.001                                   | 0.897          | 2.339                                    | 1.925                                   | -0.074                                  |
| Catboost6                                                              | 0.930          | 1.953                                    | 1.542                                   | 0.000                                   | 0.899          | 2.317                                    | 1.906                                   | -0.077                                  |
| LightGBM6                                                              | 0.948          | 1.675                                    | 1.326                                   | 0.000                                   | 0.896          | 2.359                                    | 1.935                                   | -0.083                                  |
| CART6                                                                  | 0.892          | 2.424                                    | 1.897                                   | 0.000                                   | 0.860          | 2.730                                    | 2.185                                   | -0.075                                  |
| ET6                                                                    | 0.902          | 2.307                                    | 1.834                                   | 0.000                                   | 0.881          | 2.521                                    | 2.048                                   | -0.079                                  |
| RF6                                                                    | 0.984          | 0.943                                    | 0.685                                   | 0.001                                   | 0.886          | 2.464                                    | 1.998                                   | -0.092                                  |
| GBDT6                                                                  | 0.929          | 1.964                                    | 1.557                                   | 0.000                                   | 0.897          | 2.341                                    | 1.925                                   | -0.073                                  |
| MLP6                                                                   | 0.911          | 2.196                                    | 1.746                                   | 0.052                                   | 0.892          | 2.400                                    | 1.960                                   | -0.027                                  |
| SVM-RBF6                                                               | 0.909          | 2.224                                    | 1.732                                   | -0.134                                  | 0.880          | 2.518                                    | 2.090                                   | -0.215                                  |
| <b><math>R_a n/N T_{max} T_{min} H_0 U_0 P_{re} P_{rs}</math> (C7)</b> |                |                                          |                                         |                                         |                |                                          |                                         |                                         |
| XGBoost7                                                               | 0.932          | 1.930                                    | 1.517                                   | 0.000                                   | 0.900          | 2.311                                    | 1.889                                   | -0.075                                  |
| Catboost7                                                              | 0.935          | 1.886                                    | 1.481                                   | 0.000                                   | 0.903          | 2.275                                    | 1.863                                   | -0.067                                  |
| LightGBM7                                                              | 0.954          | 1.584                                    | 1.240                                   | 0.000                                   | 0.901          | 2.293                                    | 1.861                                   | -0.093                                  |
| CART7                                                                  | 0.892          | 2.422                                    | 1.896                                   | 0.000                                   | 0.860          | 2.729                                    | 2.181                                   | -0.077                                  |
| ET7                                                                    | 0.901          | 2.318                                    | 1.846                                   | 0.000                                   | 0.878          | 2.546                                    | 2.073                                   | -0.081                                  |
| RF7                                                                    | 0.984          | 0.923                                    | 0.671                                   | 0.000                                   | 0.888          | 2.445                                    | 1.974                                   | -0.085                                  |
| GBDT7                                                                  | 0.932          | 1.931                                    | 1.519                                   | 0.000                                   | 0.900          | 2.311                                    | 1.890                                   | -0.077                                  |
| MLP7                                                                   | 0.913          | 2.181                                    | 1.732                                   | -0.036                                  | 0.898          | 2.329                                    | 1.896                                   | -0.120                                  |
| SVM-RBF7                                                               | 0.908          | 2.233                                    | 1.749                                   | -0.122                                  | 0.880          | 2.525                                    | 2.095                                   | -0.211                                  |



**Table S12** Same as Table S4 but at Lasa station.

| Input/Model                                                                                                                    | Training       |                                          |                                         |                                         | Testing        |                                          |                                         |                                         |
|--------------------------------------------------------------------------------------------------------------------------------|----------------|------------------------------------------|-----------------------------------------|-----------------------------------------|----------------|------------------------------------------|-----------------------------------------|-----------------------------------------|
|                                                                                                                                | R <sup>2</sup> | RMSE(MJm <sup>-2</sup> d <sup>-1</sup> ) | MAE(MJm <sup>-2</sup> d <sup>-1</sup> ) | MBE(MJm <sup>-2</sup> d <sup>-1</sup> ) | R <sup>2</sup> | RMSE(MJm <sup>-2</sup> d <sup>-1</sup> ) | MAE(MJm <sup>-2</sup> d <sup>-1</sup> ) | MBE(MJm <sup>-2</sup> d <sup>-1</sup> ) |
| <b><i>R<sub>a</sub> n/N (C1)</i></b>                                                                                           |                |                                          |                                         |                                         |                |                                          |                                         |                                         |
| XGBoost1                                                                                                                       | 0.889          | 1.754                                    | 1.311                                   | 0.000                                   | 0.854          | 1.983                                    | 1.484                                   | 0.022                                   |
| Catboost1                                                                                                                      | 0.884          | 1.791                                    | 1.338                                   | 0.000                                   | <b>0.855</b>   | <b>1.976</b>                             | <b>1.474</b>                            | 0.026                                   |
| LightGBM1                                                                                                                      | <b>0.901</b>   | <b>1.655</b>                             | <b>1.239</b>                            | 0.000                                   | 0.850          | 2.012                                    | 1.509                                   | 0.036                                   |
| CART1                                                                                                                          | 0.849          | 2.044                                    | 1.536                                   | 0.000                                   | 0.817          | 2.226                                    | 1.673                                   | 0.003                                   |
| ET1                                                                                                                            | 0.842          | 2.086                                    | 1.584                                   | 0.000                                   | 0.827          | 2.174                                    | 1.662                                   | 0.012                                   |
| RF1                                                                                                                            | <b>0.973</b>   | <b>0.866</b>                             | <b>0.605</b>                            | -0.002                                  | 0.821          | 2.208                                    | 1.662                                   | 0.034                                   |
| GBDT1                                                                                                                          | <b>0.890</b>   | <b>1.741</b>                             | <b>1.304</b>                            | 0.000                                   | <b>0.855</b>   | <b>1.978</b>                             | <b>1.480</b>                            | 0.025                                   |
| MLP1                                                                                                                           | 0.868          | 1.911                                    | 1.406                                   | 0.002                                   | 0.854          | 1.987                                    | 1.485                                   | 0.013                                   |
| SVM-RBF1                                                                                                                       | 0.872          | 1.881                                    | 1.374                                   | -0.119                                  | <b>0.859</b>   | <b>1.949</b>                             | <b>1.448</b>                            | -0.099                                  |
| <b><i>R<sub>a</sub> n/N T<sub>max</sub> T<sub>min</sub> (C2)</i></b>                                                           |                |                                          |                                         |                                         |                |                                          |                                         |                                         |
| XGBoost2                                                                                                                       | 0.902          | 1.649                                    | 1.234                                   | 0.000                                   | 0.866          | 1.902                                    | 1.421                                   | 0.026                                   |
| Catboost2                                                                                                                      | 0.902          | 1.647                                    | 1.230                                   | 0.000                                   | <b>0.870</b>   | <b>1.873</b>                             | <b>1.398</b>                            | 0.033                                   |
| LightGBM2                                                                                                                      | <b>0.925</b>   | <b>1.435</b>                             | <b>1.073</b>                            | 0.000                                   | 0.866          | 1.906                                    | 1.428                                   | 0.027                                   |
| CART2                                                                                                                          | 0.851          | 2.030                                    | 1.532                                   | 0.000                                   | 0.822          | 2.197                                    | 1.666                                   | 0.007                                   |
| ET2                                                                                                                            | 0.844          | 2.078                                    | 1.590                                   | 0.000                                   | 0.827          | 2.167                                    | 1.652                                   | 0.011                                   |
| RF2                                                                                                                            | <b>0.977</b>   | <b>0.804</b>                             | <b>0.558</b>                            | 0.006                                   | 0.851          | 2.017                                    | 1.516                                   | 0.042                                   |
| GBDT2                                                                                                                          | <b>0.902</b>   | <b>1.642</b>                             | <b>1.231</b>                            | 0.000                                   | 0.866          | 1.902                                    | 1.421                                   | 0.028                                   |
| MLP2                                                                                                                           | 0.878          | 1.834                                    | 1.342                                   | 0.031                                   | <b>0.867</b>   | <b>1.898</b>                             | <b>1.405</b>                            | 0.046                                   |
| SVM-RBF2                                                                                                                       | 0.879          | 1.830                                    | 1.336                                   | -0.101                                  | <b>0.866</b>   | <b>1.895</b>                             | <b>1.408</b>                            | -0.080                                  |
| <b><i>R<sub>a</sub> n/N H<sub>0</sub> U<sub>0</sub> (C3)</i></b>                                                               |                |                                          |                                         |                                         |                |                                          |                                         |                                         |
| XGBoost3                                                                                                                       | 0.894          | 1.713                                    | 1.282                                   | 0.000                                   | <b>0.855</b>   | <b>1.977</b>                             | <b>1.474</b>                            | 0.024                                   |
| Catboost3                                                                                                                      | 0.890          | 1.741                                    | 1.301                                   | 0.000                                   | 0.855          | 1.980                                    | 1.475                                   | 0.033                                   |
| LightGBM3                                                                                                                      | <b>0.920</b>   | <b>1.490</b>                             | <b>1.117</b>                            | 0.000                                   | 0.855          | 1.982                                    | 1.469                                   | 0.020                                   |
| CART3                                                                                                                          | 0.849          | 2.044                                    | 1.536                                   | 0.000                                   | 0.817          | 2.226                                    | 1.673                                   | 0.004                                   |
| ET3                                                                                                                            | 0.845          | 2.070                                    | 1.575                                   | 0.000                                   | 0.828          | 2.167                                    | 1.652                                   | 0.009                                   |
| RF3                                                                                                                            | <b>0.975</b>   | <b>0.828</b>                             | <b>0.575</b>                            | 0.006                                   | 0.831          | 2.142                                    | 1.600                                   | 0.024                                   |
| GBDT3                                                                                                                          | <b>0.895</b>   | <b>1.703</b>                             | <b>1.275</b>                            | 0.000                                   | <b>0.856</b>   | <b>1.972</b>                             | <b>1.470</b>                            | 0.025                                   |
| MLP3                                                                                                                           | 0.868          | 1.911                                    | 1.402                                   | -0.027                                  | 0.852          | 1.995                                    | 1.490                                   | -0.018                                  |
| SVM-RBF                                                                                                                        | 0.872          | 1.882                                    | 1.375                                   | -0.117                                  | <b>0.857</b>   | <b>1.960</b>                             | <b>1.461</b>                            | -0.102                                  |
| <b><i>R<sub>a</sub> n/N P<sub>re</sub> P<sub>rs</sub> (C4)</i></b>                                                             |                |                                          |                                         |                                         |                |                                          |                                         |                                         |
| XGBoost4                                                                                                                       | 0.893          | 1.721                                    | 1.292                                   | 0.000                                   | 0.857          | 1.968                                    | 1.477                                   | 0.025                                   |
| Catboost4                                                                                                                      | 0.889          | 1.752                                    | 1.315                                   | 0.000                                   | 0.857          | 1.967                                    | <b>1.467</b>                            | 0.035                                   |
| LightGBM4                                                                                                                      | <b>0.916</b>   | <b>1.524</b>                             | <b>1.150</b>                            | 0.000                                   | 0.851          | 2.006                                    | 1.498                                   | 0.032                                   |
| CART4                                                                                                                          | 0.850          | 2.038                                    | 1.534                                   | 0.000                                   | 0.816          | 2.235                                    | 1.678                                   | 0.012                                   |
| ET4                                                                                                                            | 0.844          | 2.074                                    | 1.579                                   | 0.000                                   | 0.825          | 2.187                                    | 1.666                                   | 0.004                                   |
| RF4                                                                                                                            | <b>0.975</b>   | <b>0.831</b>                             | <b>0.581</b>                            | 0.008                                   | 0.834          | 2.123                                    | 1.590                                   | 0.043                                   |
| GBDT4                                                                                                                          | <b>0.894</b>   | <b>1.711</b>                             | <b>1.286</b>                            | 0.000                                   | <b>0.857</b>   | <b>1.963</b>                             | 1.473                                   | 0.025                                   |
| MLP4                                                                                                                           | 0.874          | 1.866                                    | 1.384                                   | -0.024                                  | <b>0.858</b>   | <b>1.958</b>                             | <b>1.462</b>                            | 0.000                                   |
| SVM-RBF4                                                                                                                       | 0.875          | 1.856                                    | 1.370                                   | -0.121                                  | <b>0.861</b>   | <b>1.933</b>                             | <b>1.445</b>                            | -0.093                                  |
| <b><i>R<sub>a</sub> n/N T<sub>max</sub> T<sub>min</sub> H<sub>0</sub> U<sub>0</sub> (C5)</i></b>                               |                |                                          |                                         |                                         |                |                                          |                                         |                                         |
| XGBoost5                                                                                                                       | 0.904          | 1.629                                    | 1.222                                   | 0.000                                   | 0.867          | 1.897                                    | 1.419                                   | 0.028                                   |
| Catboost5                                                                                                                      | <b>0.905</b>   | <b>1.621</b>                             | <b>1.210</b>                            | 0.000                                   | <b>0.870</b>   | <b>1.874</b>                             | <b>1.393</b>                            | 0.039                                   |
| LightGBM5                                                                                                                      | <b>0.935</b>   | <b>1.341</b>                             | <b>1.010</b>                            | 0.000                                   | <b>0.870</b>   | <b>1.874</b>                             | <b>1.399</b>                            | 0.016                                   |
| CART5                                                                                                                          | 0.851          | 2.030                                    | 1.531                                   | 0.000                                   | 0.822          | 2.197                                    | 1.666                                   | 0.008                                   |
| ET5                                                                                                                            | 0.842          | 2.087                                    | 1.596                                   | 0.000                                   | 0.823          | 2.199                                    | 1.677                                   | 0.007                                   |
| RF5                                                                                                                            | <b>0.977</b>   | <b>0.792</b>                             | <b>0.549</b>                            | 0.014                                   | 0.851          | 2.016                                    | 1.519                                   | 0.038                                   |
| GBDT5                                                                                                                          | 0.905          | 1.624                                    | 1.221                                   | 0.000                                   | <b>0.867</b>   | <b>1.893</b>                             | <b>1.415</b>                            | 0.028                                   |
| MLP5                                                                                                                           | 0.876          | 1.846                                    | 1.359                                   | 0.114                                   | 0.857          | 1.963                                    | 1.474                                   | 0.161                                   |
| SVM-RBF5                                                                                                                       | 0.876          | 1.849                                    | 1.350                                   | -0.104                                  | 0.863          | 1.918                                    | 1.428                                   | -0.083                                  |
| <b><i>R<sub>a</sub> n/N T<sub>max</sub> T<sub>min</sub> P<sub>re</sub> P<sub>rs</sub> (C6)</i></b>                             |                |                                          |                                         |                                         |                |                                          |                                         |                                         |
| XGBoost6                                                                                                                       | 0.903          | 1.641                                    | 1.229                                   | 0.000                                   | <b>0.867</b>   | <b>1.900</b>                             | <b>1.422</b>                            | 0.022                                   |
| Catboost6                                                                                                                      | 0.902          | 1.648                                    | 1.232                                   | 0.000                                   | <b>0.868</b>   | <b>1.885</b>                             | <b>1.395</b>                            | 0.051                                   |
| LightGBM6                                                                                                                      | <b>0.932</b>   | <b>1.374</b>                             | <b>1.031</b>                            | 0.000                                   | <b>0.867</b>   | <b>1.897</b>                             | <b>1.418</b>                            | 0.028                                   |
| CART6                                                                                                                          | 0.851          | 2.029                                    | 1.531                                   | 0.000                                   | 0.822          | 2.197                                    | 1.666                                   | 0.007                                   |
| ET6                                                                                                                            | 0.836          | 2.126                                    | 1.626                                   | 0.000                                   | 0.824          | 2.191                                    | 1.687                                   | -0.004                                  |
| RF6                                                                                                                            | <b>0.977</b>   | <b>0.798</b>                             | <b>0.556</b>                            | 0.009                                   | 0.849          | 2.028                                    | 1.527                                   | 0.059                                   |
| GBDT6                                                                                                                          | <b>0.903</b>   | <b>1.633</b>                             | <b>1.227</b>                            | 0.000                                   | 0.866          | 1.900                                    | 1.421                                   | 0.025                                   |
| MLP6                                                                                                                           | 0.882          | 1.810                                    | 1.339                                   | 0.034                                   | 0.863          | 1.916                                    | 1.428                                   | 0.058                                   |
| SVM-RBF6                                                                                                                       | 0.878          | 1.836                                    | 1.351                                   | -0.104                                  | 0.865          | 1.906                                    | 1.422                                   | -0.081                                  |
| <b><i>R<sub>a</sub> n/N T<sub>max</sub> T<sub>min</sub> H<sub>0</sub> U<sub>0</sub> P<sub>re</sub> P<sub>rs</sub> (C7)</i></b> |                |                                          |                                         |                                         |                |                                          |                                         |                                         |
| XGBoost7                                                                                                                       | 0.905          | 1.623                                    | 1.218                                   | 0.000                                   | 0.866          | 1.901                                    | 1.422                                   | 0.030                                   |
| Catboost7                                                                                                                      | 0.905          | 1.625                                    | 1.216                                   | 0.000                                   | <b>0.868</b>   | <b>1.885</b>                             | <b>1.401</b>                            | 0.037                                   |
| LightGBM7                                                                                                                      | <b>0.939</b>   | <b>1.303</b>                             | <b>0.981</b>                            | 0.000                                   | <b>0.871</b>   | <b>1.872</b>                             | <b>1.393</b>                            | 0.011                                   |
| CART7                                                                                                                          | 0.851          | 2.029                                    | 1.531                                   | 0.000                                   | 0.822          | 2.197                                    | 1.666                                   | 0.008                                   |
| ET7                                                                                                                            | 0.844          | 2.076                                    | 1.588                                   | 0.000                                   | 0.824          | 2.189                                    | 1.675                                   | 0.015                                   |
| RF7                                                                                                                            | <b>0.978</b>   | <b>0.786</b>                             | <b>0.547</b>                            | 0.001                                   | 0.850          | 2.020                                    | 1.521                                   | 0.041                                   |
| GBDT7                                                                                                                          | <b>0.906</b>   | <b>1.615</b>                             | <b>1.215</b>                            | 0.000                                   | 0.867          | 1.895                                    | 1.415                                   | 0.029                                   |
| MLP7                                                                                                                           | 0.882          | 1.802                                    | 1.335                                   | 0.058                                   | <b>0.869</b>   | <b>1.882</b>                             | <b>1.399</b>                            | 0.084                                   |
| SVM-RBF7                                                                                                                       | 0.875          | 1.855                                    | 1.365                                   | -0.101                                  | 0.861          | 1.932                                    | 1.444                                   | -0.076                                  |

**Table S13** Same as Table S4 but at Ejinaqi station.

| Input/Model                                                                                                                    | Training       |                                          |                                         |                                         | Testing        |                                          |                                         |                                         |
|--------------------------------------------------------------------------------------------------------------------------------|----------------|------------------------------------------|-----------------------------------------|-----------------------------------------|----------------|------------------------------------------|-----------------------------------------|-----------------------------------------|
|                                                                                                                                | R <sup>2</sup> | RMSE(MJm <sup>-2</sup> d <sup>-1</sup> ) | MAE(MJm <sup>-2</sup> d <sup>-1</sup> ) | MBE(MJm <sup>-2</sup> d <sup>-1</sup> ) | R <sup>2</sup> | RMSE(MJm <sup>-2</sup> d <sup>-1</sup> ) | MAE(MJm <sup>-2</sup> d <sup>-1</sup> ) | MBE(MJm <sup>-2</sup> d <sup>-1</sup> ) |
| <b><i>R<sub>e</sub> n/N (C1)</i></b>                                                                                           |                |                                          |                                         |                                         |                |                                          |                                         |                                         |
| XGBoost1                                                                                                                       | 0.959          | 1.532                                    | 1.100                                   | 0.000                                   | 0.950          | 1.675                                    | 1.206                                   | -0.016                                  |
| Catboost1                                                                                                                      | 0.957          | 1.561                                    | 1.121                                   | 0.000                                   | <b>0.951</b>   | <b>1.661</b>                             | <b>1.193</b>                            | -0.019                                  |
| LightGBM1                                                                                                                      | 0.964          | 1.431                                    | 1.036                                   | 0.000                                   | 0.948          | 1.711                                    | 1.226                                   | -0.020                                  |
| CART1                                                                                                                          | 0.942          | 1.820                                    | 1.350                                   | 0.000                                   | 0.933          | 1.947                                    | 1.439                                   | -0.007                                  |
| ET1                                                                                                                            | 0.939          | 1.861                                    | 1.386                                   | 0.000                                   | 0.935          | 1.920                                    | 1.424                                   | -0.024                                  |
| RF1                                                                                                                            | <b>0.990</b>   | <b>0.767</b>                             | <b>0.509</b>                            | 0.001                                   | 0.937          | 1.881                                    | 1.348                                   | -0.014                                  |
| GBDT1                                                                                                                          | 0.959          | 1.524                                    | 1.097                                   | 0.000                                   | 0.950          | 1.680                                    | 1.210                                   | -0.017                                  |
| MLP1                                                                                                                           | 0.949          | 1.699                                    | 1.228                                   | 0.048                                   | 0.946          | 1.744                                    | 1.262                                   | 0.026                                   |
| SVM-RBF1                                                                                                                       | 0.954          | 1.627                                    | 1.160                                   | -0.055                                  | 0.951          | 1.667                                    | 1.195                                   | -0.078                                  |
| <b><i>R<sub>e</sub> n/N T<sub>max</sub> T<sub>min</sub> (C2)</i></b>                                                           |                |                                          |                                         |                                         |                |                                          |                                         |                                         |
| XGBoost2                                                                                                                       | 0.964          | 1.430                                    | 1.016                                   | 0.000                                   | 0.954          | 1.608                                    | 1.141                                   | -0.016                                  |
| Catboost2                                                                                                                      | 0.964          | 1.428                                    | 1.014                                   | 0.000                                   | <b>0.955</b>   | <b>1.584</b>                             | <b>1.117</b>                            | -0.018                                  |
| LightGBM2                                                                                                                      | 0.974          | 1.221                                    | 0.881                                   | 0.000                                   | 0.952          | 1.632                                    | 1.151                                   | -0.015                                  |
| CART2                                                                                                                          | 0.942          | 1.820                                    | 1.349                                   | 0.000                                   | 0.933          | 1.948                                    | 1.439                                   | -0.006                                  |
| ET2                                                                                                                            | 0.934          | 1.935                                    | 1.453                                   | 0.000                                   | 0.929          | 1.997                                    | 1.499                                   | -0.033                                  |
| RF2                                                                                                                            | <b>0.991</b>   | <b>0.716</b>                             | <b>0.468</b>                            | -0.002                                  | 0.946          | 1.751                                    | 1.234                                   | -0.020                                  |
| GBDT2                                                                                                                          | 0.964          | 1.426                                    | 1.014                                   | 0.000                                   | 0.954          | 1.605                                    | 1.139                                   | -0.019                                  |
| MLP2                                                                                                                           | 0.955          | 1.609                                    | 1.142                                   | -0.094                                  | 0.951          | 1.659                                    | 1.179                                   | -0.103                                  |
| SVM-RBF2                                                                                                                       | 0.958          | 1.547                                    | 1.089                                   | -0.087                                  | 0.955          | 1.589                                    | 1.122                                   | -0.111                                  |
| <b><i>R<sub>e</sub> n/N H<sub>0</sub> U<sub>0</sub> (C3)</i></b>                                                               |                |                                          |                                         |                                         |                |                                          |                                         |                                         |
| XGBoost3                                                                                                                       | 0.964          | 1.441                                    | 1.043                                   | 0.000                                   | 0.954          | 1.609                                    | 1.166                                   | -0.004                                  |
| Catboost3                                                                                                                      | 0.963          | 1.449                                    | 1.045                                   | 0.000                                   | <b>0.955</b>   | <b>1.582</b>                             | <b>1.144</b>                            | -0.002                                  |
| LightGBM3                                                                                                                      | 0.973          | 1.243                                    | 0.913                                   | 0.000                                   | 0.952          | 1.639                                    | 1.178                                   | -0.005                                  |
| CART3                                                                                                                          | 0.943          | 1.807                                    | 1.342                                   | 0.000                                   | 0.934          | 1.939                                    | 1.433                                   | -0.006                                  |
| ET3                                                                                                                            | 0.941          | 1.827                                    | 1.361                                   | 0.000                                   | 0.938          | 1.874                                    | 1.397                                   | -0.035                                  |
| RF3                                                                                                                            | <b>0.991</b>   | <b>0.706</b>                             | <b>0.475</b>                            | -0.001                                  | 0.945          | 1.752                                    | 1.264                                   | 0.012                                   |
| GBDT3                                                                                                                          | 0.964          | 1.434                                    | 1.040                                   | 0.000                                   | 0.954          | 1.611                                    | 1.168                                   | -0.005                                  |
| MLP3                                                                                                                           | 0.954          | 1.623                                    | 1.176                                   | 0.083                                   | 0.951          | 1.667                                    | 1.211                                   | 0.070                                   |
| SVM-RBF                                                                                                                        | 0.956          | 1.579                                    | 1.132                                   | -0.073                                  | 0.954          | 1.612                                    | 1.164                                   | -0.086                                  |
| <b><i>R<sub>e</sub> n/N P<sub>re</sub> P<sub>rs</sub> (C4)</i></b>                                                             |                |                                          |                                         |                                         |                |                                          |                                         |                                         |
| XGBoost4                                                                                                                       | 0.963          | 1.454                                    | 1.040                                   | 0.001                                   | 0.953          | 1.622                                    | 1.160                                   | -0.016                                  |
| Catboost4                                                                                                                      | 0.962          | 1.473                                    | 1.051                                   | 0.000                                   | <b>0.954</b>   | <b>1.603</b>                             | <b>1.144</b>                            | -0.014                                  |
| LightGBM4                                                                                                                      | 0.971          | 1.282                                    | 0.929                                   | 0.000                                   | 0.952          | 1.648                                    | 1.171                                   | -0.020                                  |
| CART4                                                                                                                          | 0.942          | 1.812                                    | 1.345                                   | 0.000                                   | 0.933          | 1.940                                    | 1.433                                   | -0.008                                  |
| ET4                                                                                                                            | 0.940          | 1.857                                    | 1.387                                   | 0.000                                   | 0.937          | 1.885                                    | 1.405                                   | -0.025                                  |
| RF4                                                                                                                            | <b>0.991</b>   | <b>0.718</b>                             | <b>0.480</b>                            | 0.000                                   | 0.944          | 1.783                                    | 1.274                                   | -0.004                                  |
| GBDT4                                                                                                                          | 0.963          | 1.449                                    | 1.038                                   | 0.000                                   | 0.953          | 1.622                                    | 1.161                                   | -0.018                                  |
| MLP4                                                                                                                           | 0.951          | 1.666                                    | 1.199                                   | 0.027                                   | 0.949          | 1.694                                    | 1.223                                   | 0.003                                   |
| SVM-RBF4                                                                                                                       | 0.955          | 1.594                                    | 1.130                                   | -0.085                                  | 0.953          | 1.632                                    | 1.162                                   | -0.107                                  |
| <b><i>R<sub>e</sub> n/N T<sub>max</sub> T<sub>min</sub> H<sub>0</sub> U<sub>0</sub> (C5)</i></b>                               |                |                                          |                                         |                                         |                |                                          |                                         |                                         |
| XGBoost5                                                                                                                       | 0.967          | 1.381                                    | 0.991                                   | 0.000                                   | 0.956          | 1.566                                    | 1.124                                   | 0.000                                   |
| Catboost5                                                                                                                      | 0.967          | 1.371                                    | 0.982                                   | 0.000                                   | <b>0.958</b>   | <b>1.533</b>                             | <b>1.096</b>                            | 0.010                                   |
| LightGBM5                                                                                                                      | 0.978          | 1.124                                    | 0.823                                   | 0.000                                   | 0.956          | 1.577                                    | 1.121                                   | 0.005                                   |
| CART5                                                                                                                          | 0.943          | 1.807                                    | 1.342                                   | 0.000                                   | 0.934          | 1.939                                    | 1.433                                   | -0.006                                  |
| ET5                                                                                                                            | 0.942          | 1.827                                    | 1.370                                   | 0.000                                   | 0.938          | 1.872                                    | 1.403                                   | -0.018                                  |
| RF5                                                                                                                            | <b>0.992</b>   | <b>0.677</b>                             | <b>0.451</b>                            | 0.003                                   | 0.950          | 1.675                                    | 1.195                                   | 0.011                                   |
| GBDT5                                                                                                                          | 0.967          | 1.376                                    | 0.989                                   | 0.000                                   | 0.956          | 1.566                                    | 1.123                                   | -0.005                                  |
| MLP5                                                                                                                           | 0.957          | 1.559                                    | 1.115                                   | -0.007                                  | 0.955          | 1.601                                    | 1.146                                   | -0.025                                  |
| SVM-RBF5                                                                                                                       | 0.958          | 1.541                                    | 1.094                                   | -0.089                                  | 0.956          | 1.575                                    | 1.125                                   | -0.107                                  |
| <b><i>R<sub>e</sub> n/N T<sub>max</sub> T<sub>min</sub> P<sub>re</sub> P<sub>rs</sub> (C6)</i></b>                             |                |                                          |                                         |                                         |                |                                          |                                         |                                         |
| XGBoost6                                                                                                                       | 0.966          | 1.401                                    | 0.999                                   | 0.001                                   | 0.955          | 1.579                                    | 1.126                                   | -0.017                                  |
| Catboost6                                                                                                                      | 0.966          | 1.396                                    | 0.995                                   | 0.000                                   | <b>0.957</b>   | <b>1.548</b>                             | <b>1.099</b>                            | -0.007                                  |
| LightGBM6                                                                                                                      | 0.977          | 1.153                                    | 0.839                                   | 0.000                                   | 0.955          | 1.592                                    | 1.127                                   | -0.017                                  |
| CART6                                                                                                                          | 0.942          | 1.812                                    | 1.345                                   | 0.000                                   | 0.933          | 1.940                                    | 1.433                                   | -0.008                                  |
| ET6                                                                                                                            | 0.935          | 1.920                                    | 1.448                                   | 0.000                                   | 0.931          | 1.975                                    | 1.479                                   | -0.019                                  |
| RF6                                                                                                                            | <b>0.992</b>   | <b>0.695</b>                             | <b>0.457</b>                            | -0.001                                  | 0.949          | 1.691                                    | 1.200                                   | -0.017                                  |
| GBDT6                                                                                                                          | 0.966          | 1.395                                    | 0.998                                   | 0.000                                   | 0.955          | 1.581                                    | 1.128                                   | -0.019                                  |
| MLP6                                                                                                                           | 0.955          | 1.604                                    | 1.144                                   | -0.019                                  | 0.953          | 1.631                                    | 1.165                                   | -0.050                                  |
| SVM-RBF6                                                                                                                       | 0.957          | 1.575                                    | 1.110                                   | -0.099                                  | 0.954          | 1.614                                    | 1.142                                   | -0.125                                  |
| <b><i>R<sub>e</sub> n/N T<sub>max</sub> T<sub>min</sub> H<sub>0</sub> U<sub>0</sub> P<sub>re</sub> P<sub>rs</sub> (C7)</i></b> |                |                                          |                                         |                                         |                |                                          |                                         |                                         |
| XGBoost7                                                                                                                       | 0.967          | 1.367                                    | 0.982                                   | 0.000                                   | 0.957          | 1.561                                    | 1.120                                   | 0.000                                   |
| Catboost7                                                                                                                      | 0.968          | 1.352                                    | 0.970                                   | 0.000                                   | <b>0.959</b>   | <b>1.522</b>                             | <b>1.090</b>                            | 0.005                                   |
| LightGBM7                                                                                                                      | 0.979          | 1.092                                    | 0.801                                   | 0.000                                   | 0.956          | 1.571                                    | 1.117                                   | 0.008                                   |
| CART7                                                                                                                          | 0.943          | 1.806                                    | 1.342                                   | 0.000                                   | 0.933          | 1.940                                    | 1.433                                   | -0.007                                  |
| ET7                                                                                                                            | 0.935          | 1.923                                    | 1.443                                   | 0.000                                   | 0.931          | 1.973                                    | 1.481                                   | -0.029                                  |
| RF7                                                                                                                            | <b>0.992</b>   | <b>0.669</b>                             | <b>0.447</b>                            | 0.010                                   | 0.950          | 1.682                                    | 1.201                                   | 0.011                                   |
| GBDT7                                                                                                                          | 0.967          | 1.363                                    | 0.982                                   | 0.000                                   | 0.957          | 1.561                                    | 1.119                                   | -0.002                                  |
| MLP7                                                                                                                           | 0.955          | 1.596                                    | 1.144                                   | 0.025                                   | 0.953          | 1.622                                    | 1.166                                   | 0.006                                   |
| SVM-RBF7                                                                                                                       | 0.956          | 1.584                                    | 1.125                                   | -0.097                                  | 0.954          | 1.620                                    | 1.158                                   | -0.113                                  |

**Table S14** Same as Table S4 but at Geermu station.

| Input/Model                                                                                                                    | Training       |                                          |                                         |                                         | Testing        |                                          |                                         |                                         |
|--------------------------------------------------------------------------------------------------------------------------------|----------------|------------------------------------------|-----------------------------------------|-----------------------------------------|----------------|------------------------------------------|-----------------------------------------|-----------------------------------------|
|                                                                                                                                | R <sup>2</sup> | RMSE(MJm <sup>-2</sup> d <sup>-1</sup> ) | MAE(MJm <sup>-2</sup> d <sup>-1</sup> ) | MBE(MJm <sup>-2</sup> d <sup>-1</sup> ) | R <sup>2</sup> | RMSE(MJm <sup>-2</sup> d <sup>-1</sup> ) | MAE(MJm <sup>-2</sup> d <sup>-1</sup> ) | MBE(MJm <sup>-2</sup> d <sup>-1</sup> ) |
| <b><i>R<sub>a</sub> n/N (C1)</i></b>                                                                                           |                |                                          |                                         |                                         |                |                                          |                                         |                                         |
| XGBoost1                                                                                                                       | 0.962          | 1.376                                    | 0.990                                   | 0.000                                   | 0.956          | 1.485                                    | 1.067                                   | -0.005                                  |
| Catboost1                                                                                                                      | 0.961          | 1.401                                    | 1.008                                   | 0.000                                   | <b>0.957</b>   | <b>1.467</b>                             | <b>1.049</b>                            | -0.010                                  |
| LightGBM1                                                                                                                      | 0.968          | 1.280                                    | 0.928                                   | 0.000                                   | 0.955          | 1.505                                    | 1.076                                   | -0.004                                  |
| CART1                                                                                                                          | 0.939          | 1.758                                    | 1.322                                   | 0.000                                   | 0.932          | 1.845                                    | 1.382                                   | -0.014                                  |
| ET1                                                                                                                            | 0.936          | 1.800                                    | 1.364                                   | 0.000                                   | 0.935          | 1.798                                    | 1.362                                   | 0.004                                   |
| RF1                                                                                                                            | <b>0.991</b>   | <b>0.688</b>                             | <b>0.461</b>                            | -0.004                                  | 0.943          | 1.691                                    | 1.205                                   | -0.014                                  |
| GBDT1                                                                                                                          | 0.963          | 1.369                                    | 0.987                                   | 0.000                                   | 0.956          | 1.490                                    | 1.069                                   | -0.006                                  |
| MLP1                                                                                                                           | 0.952          | 1.551                                    | 1.120                                   | 0.008                                   | 0.952          | 1.554                                    | 1.118                                   | -0.002                                  |
| SVM-RBF1                                                                                                                       | 0.957          | 1.475                                    | 1.052                                   | -0.110                                  | 0.956          | 1.485                                    | 1.059                                   | -0.122                                  |
| <b><i>R<sub>a</sub> n/N T<sub>max</sub> T<sub>min</sub> (C2)</i></b>                                                           |                |                                          |                                         |                                         |                |                                          |                                         |                                         |
| XGBoost2                                                                                                                       | 0.964          | 1.340                                    | 0.959                                   | 0.000                                   | 0.957          | 1.460                                    | 1.044                                   | -0.008                                  |
| Catboost2                                                                                                                      | 0.966          | 1.314                                    | 0.941                                   | 0.000                                   | <b>0.959</b>   | <b>1.432</b>                             | <b>1.017</b>                            | -0.005                                  |
| LightGBM2                                                                                                                      | 0.975          | 1.123                                    | 0.818                                   | 0.000                                   | 0.957          | 1.464                                    | 1.039                                   | -0.003                                  |
| CART2                                                                                                                          | 0.939          | 1.756                                    | 1.320                                   | 0.000                                   | 0.932          | 1.844                                    | 1.381                                   | -0.015                                  |
| ET2                                                                                                                            | 0.938          | 1.768                                    | 1.347                                   | 0.000                                   | 0.938          | 1.766                                    | 1.338                                   | -0.017                                  |
| RF2                                                                                                                            | <b>0.991</b>   | <b>0.656</b>                             | <b>0.436</b>                            | 0.003                                   | 0.951          | 1.574                                    | 1.123                                   | 0.006                                   |
| GBDT2                                                                                                                          | 0.965          | 1.336                                    | 0.957                                   | 0.000                                   | 0.957          | 1.464                                    | 1.045                                   | -0.005                                  |
| MLP2                                                                                                                           | 0.952          | 1.561                                    | 1.120                                   | -0.015                                  | 0.951          | 1.569                                    | 1.122                                   | -0.028                                  |
| SVM-RBF2                                                                                                                       | 0.957          | 1.480                                    | 1.040                                   | -0.122                                  | 0.956          | 1.490                                    | 1.046                                   | -0.136                                  |
| <b><i>R<sub>a</sub> n/N H<sub>0</sub> U<sub>0</sub> (C3)</i></b>                                                               |                |                                          |                                         |                                         |                |                                          |                                         |                                         |
| XGBoost3                                                                                                                       | 0.966          | 1.319                                    | 0.961                                   | 0.000                                   | 0.958          | 1.448                                    | 1.047                                   | 0.002                                   |
| Catboost3                                                                                                                      | 0.965          | 1.327                                    | 0.968                                   | 0.000                                   | <b>0.959</b>   | <b>1.432</b>                             | <b>1.038</b>                            | 0.010                                   |
| LightGBM3                                                                                                                      | 0.975          | 1.130                                    | 0.839                                   | 0.000                                   | 0.957          | 1.466                                    | 1.057                                   | 0.011                                   |
| CART3                                                                                                                          | 0.939          | 1.749                                    | 1.318                                   | 0.000                                   | 0.932          | 1.843                                    | 1.382                                   | -0.012                                  |
| ET3                                                                                                                            | 0.941          | 1.729                                    | 1.304                                   | 0.000                                   | 0.940          | 1.738                                    | 1.308                                   | -0.004                                  |
| RF3                                                                                                                            | <b>0.992</b>   | <b>0.641</b>                             | <b>0.435</b>                            | 0.006                                   | 0.951          | 1.568                                    | 1.136                                   | 0.008                                   |
| GBDT3                                                                                                                          | 0.966          | 1.315                                    | 0.958                                   | 0.000                                   | 0.958          | 1.450                                    | 1.048                                   | 0.003                                   |
| MLP3                                                                                                                           | 0.955          | 1.509                                    | 1.096                                   | 0.007                                   | 0.954          | 1.523                                    | 1.105                                   | 0.007                                   |
| SVM-RBF                                                                                                                        | 0.958          | 1.452                                    | 1.037                                   | -0.122                                  | 0.957          | 1.461                                    | 1.043                                   | -0.128                                  |
| <b><i>R<sub>a</sub> n/N P<sub>re</sub> P<sub>rs</sub> (C4)</i></b>                                                             |                |                                          |                                         |                                         |                |                                          |                                         |                                         |
| XGBoost4                                                                                                                       | 0.965          | 1.329                                    | 0.970                                   | 0.000                                   | 0.957          | 1.464                                    | 1.057                                   | -0.007                                  |
| Catboost4                                                                                                                      | 0.964          | 1.344                                    | 0.985                                   | 0.000                                   | <b>0.958</b>   | <b>1.447</b>                             | <b>1.045</b>                            | -0.009                                  |
| LightGBM4                                                                                                                      | 0.973          | 1.161                                    | 0.861                                   | 0.000                                   | 0.957          | 1.475                                    | 1.060                                   | -0.002                                  |
| CART4                                                                                                                          | 0.939          | 1.747                                    | 1.317                                   | 0.000                                   | 0.932          | 1.844                                    | 1.381                                   | -0.013                                  |
| ET4                                                                                                                            | 0.936          | 1.800                                    | 1.362                                   | 0.000                                   | 0.934          | 1.811                                    | 1.372                                   | -0.013                                  |
| RF4                                                                                                                            | <b>0.991</b>   | <b>0.656</b>                             | <b>0.445</b>                            | 0.003                                   | 0.949          | 1.598                                    | 1.153                                   | -0.007                                  |
| GBDT4                                                                                                                          | 0.965          | 1.324                                    | 0.968                                   | 0.000                                   | 0.957          | 1.469                                    | 1.059                                   | -0.008                                  |
| MLP4                                                                                                                           | 0.955          | 1.513                                    | 1.102                                   | 0.023                                   | 0.953          | 1.537                                    | 1.108                                   | 0.005                                   |
| SVM-RBF4                                                                                                                       | 0.957          | 1.469                                    | 1.048                                   | -0.123                                  | 0.956          | 1.479                                    | 1.054                                   | -0.136                                  |
| <b><i>R<sub>a</sub> n/N T<sub>max</sub> T<sub>min</sub> H<sub>0</sub> U<sub>0</sub> (C5)</i></b>                               |                |                                          |                                         |                                         |                |                                          |                                         |                                         |
| XGBoost5                                                                                                                       | 0.966          | 1.300                                    | 0.941                                   | 0.000                                   | 0.959          | 1.438                                    | 1.037                                   | 0.003                                   |
| Catboost5                                                                                                                      | 0.968          | 1.269                                    | 0.923                                   | 0.000                                   | <b>0.961</b>   | <b>1.405</b>                             | <b>1.011</b>                            | 0.018                                   |
| LightGBM5                                                                                                                      | 0.978          | 1.049                                    | 0.774                                   | 0.000                                   | 0.959          | 1.431                                    | 1.021                                   | 0.005                                   |
| CART5                                                                                                                          | 0.939          | 1.749                                    | 1.318                                   | 0.000                                   | 0.932          | 1.843                                    | 1.382                                   | -0.012                                  |
| ET5                                                                                                                            | 0.940          | 1.742                                    | 1.324                                   | 0.000                                   | 0.938          | 1.766                                    | 1.340                                   | -0.007                                  |
| RF5                                                                                                                            | <b>0.992</b>   | <b>0.630</b>                             | <b>0.424</b>                            | 0.001                                   | 0.953          | 1.531                                    | 1.096                                   | 0.010                                   |
| GBDT5                                                                                                                          | 0.967          | 1.296                                    | 0.940                                   | 0.000                                   | 0.959          | 1.440                                    | 1.037                                   | 0.000                                   |
| MLP5                                                                                                                           | 0.958          | 1.459                                    | 1.052                                   | 0.005                                   | 0.957          | 1.465                                    | 1.052                                   | -0.008                                  |
| SVM-RBF5                                                                                                                       | 0.957          | 1.470                                    | 1.041                                   | -0.122                                  | 0.956          | 1.481                                    | 1.047                                   | -0.132                                  |
| <b><i>R<sub>a</sub> n/N T<sub>max</sub> T<sub>min</sub> P<sub>re</sub> P<sub>rs</sub> (C6)</i></b>                             |                |                                          |                                         |                                         |                |                                          |                                         |                                         |
| XGBoost6                                                                                                                       | 0.966          | 1.302                                    | 0.944                                   | 0.000                                   | 0.958          | 1.450                                    | 1.042                                   | -0.005                                  |
| Catboost6                                                                                                                      | 0.967          | 1.285                                    | 0.936                                   | 0.000                                   | <b>0.960</b>   | <b>1.422</b>                             | <b>1.017</b>                            | -0.003                                  |
| LightGBM6                                                                                                                      | 0.977          | 1.066                                    | 0.787                                   | 0.000                                   | 0.958          | 1.450                                    | 1.036                                   | -0.004                                  |
| CART6                                                                                                                          | 0.939          | 1.747                                    | 1.317                                   | 0.000                                   | 0.932          | 1.844                                    | 1.381                                   | -0.013                                  |
| ET6                                                                                                                            | 0.936          | 1.800                                    | 1.373                                   | 0.000                                   | 0.934          | 1.812                                    | 1.379                                   | -0.005                                  |
| RF6                                                                                                                            | <b>0.992</b>   | <b>0.633</b>                             | <b>0.427</b>                            | 0.002                                   | 0.952          | 1.551                                    | 1.111                                   | -0.003                                  |
| GBDT6                                                                                                                          | 0.967          | 1.298                                    | 0.943                                   | 0.000                                   | 0.958          | 1.450                                    | 1.041                                   | -0.009                                  |
| MLP6                                                                                                                           | 0.956          | 1.493                                    | 1.076                                   | -0.017                                  | 0.954          | 1.510                                    | 1.077                                   | -0.035                                  |
| SVM-RBF6                                                                                                                       | 0.955          | 1.499                                    | 1.053                                   | -0.131                                  | 0.955          | 1.510                                    | 1.061                                   | -0.146                                  |
| <b><i>R<sub>a</sub> n/N T<sub>max</sub> T<sub>min</sub> H<sub>0</sub> U<sub>0</sub> P<sub>re</sub> P<sub>rs</sub> (C7)</i></b> |                |                                          |                                         |                                         |                |                                          |                                         |                                         |
| XGBoost7                                                                                                                       | 0.967          | 1.287                                    | 0.936                                   | 0.000                                   | 0.959          | 1.440                                    | 1.039                                   | 0.003                                   |
| Catboost7                                                                                                                      | 0.969          | 1.253                                    | 0.913                                   | 0.000                                   | <b>0.960</b>   | <b>1.412</b>                             | <b>1.010</b>                            | 0.014                                   |
| LightGBM7                                                                                                                      | 0.979          | 1.025                                    | 0.759                                   | 0.000                                   | 0.959          | 1.434                                    | 1.024                                   | 0.009                                   |
| CART7                                                                                                                          | 0.940          | 1.747                                    | 1.317                                   | 0.000                                   | 0.933          | 1.838                                    | 1.379                                   | -0.016                                  |
| ET7                                                                                                                            | 0.938          | 1.764                                    | 1.347                                   | 0.000                                   | 0.936          | 1.789                                    | 1.357                                   | -0.013                                  |
| RF7                                                                                                                            | <b>0.992</b>   | <b>0.628</b>                             | <b>0.422</b>                            | 0.002                                   | 0.954          | 1.515                                    | 1.093                                   | 0.011                                   |
| GBDT7                                                                                                                          | 0.967          | 1.283                                    | 0.934                                   | 0.000                                   | 0.958          | 1.444                                    | 1.037                                   | 0.001                                   |
| MLP7                                                                                                                           | 0.956          | 1.486                                    | 1.071                                   | -0.042                                  | 0.954          | 1.510                                    | 1.080                                   | -0.046                                  |
| SVM-RBF7                                                                                                                       | 0.956          | 1.497                                    | 1.060                                   | -0.126                                  | 0.955          | 1.509                                    | 1.068                                   | -0.137                                  |



**Table S15** Same as Table S4 but at Kashi station.

| Input/Model                                                                                                                    | Training       |                                          |                                         |                                         | Testing        |                                          |                                         |                                         |
|--------------------------------------------------------------------------------------------------------------------------------|----------------|------------------------------------------|-----------------------------------------|-----------------------------------------|----------------|------------------------------------------|-----------------------------------------|-----------------------------------------|
|                                                                                                                                | R <sup>2</sup> | RMSE(MJm <sup>-2</sup> d <sup>-1</sup> ) | MAE(MJm <sup>-2</sup> d <sup>-1</sup> ) | MBE(MJm <sup>-2</sup> d <sup>-1</sup> ) | R <sup>2</sup> | RMSE(MJm <sup>-2</sup> d <sup>-1</sup> ) | MAE(MJm <sup>-2</sup> d <sup>-1</sup> ) | MBE(MJm <sup>-2</sup> d <sup>-1</sup> ) |
| <b><i>R<sub>e</sub> n/N</i> (C1)</b>                                                                                           |                |                                          |                                         |                                         |                |                                          |                                         |                                         |
| XGBoost1                                                                                                                       | 0.937          | 1.914                                    | 1.406                                   | 0.000                                   | 0.924          | 2.085                                    | 1.537                                   | 0.002                                   |
| Catboost1                                                                                                                      | 0.935          | 1.948                                    | 1.428                                   | 0.000                                   | 0.925          | 2.064                                    | 1.510                                   | 0.003                                   |
| LightGBM1                                                                                                                      | 0.944          | 1.806                                    | 1.333                                   | 0.000                                   | 0.921          | 2.118                                    | 1.556                                   | 0.006                                   |
| CART1                                                                                                                          | 0.919          | 2.173                                    | 1.639                                   | 0.000                                   | 0.904          | 2.345                                    | 1.767                                   | -0.007                                  |
| ET1                                                                                                                            | 0.917          | 2.197                                    | 1.678                                   | 0.000                                   | 0.910          | 2.279                                    | 1.738                                   | 0.006                                   |
| RF1                                                                                                                            | 0.984          | 0.952                                    | 0.660                                   | -0.010                                  | 0.904          | 2.354                                    | 1.742                                   | -0.015                                  |
| GBDT1                                                                                                                          | 0.937          | 1.907                                    | 1.402                                   | 0.000                                   | 0.924          | 2.089                                    | 1.538                                   | -0.002                                  |
| MLP1                                                                                                                           | 0.918          | 2.181                                    | 1.650                                   | -0.022                                  | 0.914          | 2.232                                    | 1.681                                   | -0.024                                  |
| SVM-RBF1                                                                                                                       | 0.929          | 2.026                                    | 1.486                                   | -0.058                                  | 0.927          | 2.049                                    | 1.506                                   | -0.060                                  |
| <b><i>R<sub>e</sub> n/N T<sub>max</sub> T<sub>min</sub></i> (C2)</b>                                                           |                |                                          |                                         |                                         |                |                                          |                                         |                                         |
| XGBoost2                                                                                                                       | 0.943          | 1.823                                    | 1.342                                   | 0.001                                   | 0.927          | 2.049                                    | 1.504                                   | 0.025                                   |
| Catboost2                                                                                                                      | 0.945          | 1.790                                    | 1.320                                   | 0.000                                   | 0.929          | 2.014                                    | 1.475                                   | 0.047                                   |
| LightGBM2                                                                                                                      | 0.959          | 1.549                                    | 1.151                                   | 0.000                                   | 0.926          | 2.059                                    | 1.512                                   | 0.041                                   |
| CART2                                                                                                                          | 0.910          | 2.291                                    | 1.732                                   | 0.000                                   | 0.893          | 2.488                                    | 1.871                                   | 0.011                                   |
| ET2                                                                                                                            | 0.914          | 2.240                                    | 1.710                                   | 0.000                                   | 0.908          | 2.303                                    | 1.756                                   | -0.001                                  |
| RF2                                                                                                                            | 0.987          | 0.873                                    | 0.599                                   | 0.004                                   | 0.916          | 2.194                                    | 1.625                                   | 0.053                                   |
| GBDT2                                                                                                                          | 0.943          | 1.815                                    | 1.337                                   | 0.000                                   | 0.927          | 2.047                                    | 1.504                                   | 0.023                                   |
| MLP2                                                                                                                           | 0.930          | 2.019                                    | 1.502                                   | -0.025                                  | 0.925          | 2.069                                    | 1.535                                   | -0.015                                  |
| SVM-RBF2                                                                                                                       | 0.932          | 1.983                                    | 1.457                                   | -0.064                                  | 0.929          | 2.013                                    | 1.482                                   | -0.056                                  |
| <b><i>R<sub>e</sub> n/N H<sub>0</sub> U<sub>0</sub></i> (C3)</b>                                                               |                |                                          |                                         |                                         |                |                                          |                                         |                                         |
| XGBoost3                                                                                                                       | 0.942          | 1.843                                    | 1.361                                   | 0.000                                   | 0.924          | 2.080                                    | 1.538                                   | 0.038                                   |
| Catboost3                                                                                                                      | 0.941          | 1.853                                    | 1.367                                   | 0.000                                   | 0.925          | 2.066                                    | 1.518                                   | 0.030                                   |
| LightGBM3                                                                                                                      | 0.956          | 1.599                                    | 1.195                                   | 0.000                                   | 0.922          | 2.110                                    | 1.554                                   | 0.031                                   |
| CART3                                                                                                                          | 0.919          | 2.164                                    | 1.633                                   | 0.000                                   | 0.904          | 2.351                                    | 1.772                                   | -0.001                                  |
| ET3                                                                                                                            | 0.917          | 2.196                                    | 1.677                                   | 0.000                                   | 0.910          | 2.280                                    | 1.741                                   | 0.017                                   |
| RF3                                                                                                                            | 0.986          | 0.893                                    | 0.620                                   | 0.006                                   | 0.910          | 2.267                                    | 1.673                                   | 0.038                                   |
| GBDT3                                                                                                                          | 0.942          | 1.839                                    | 1.357                                   | 0.000                                   | 0.924          | 2.082                                    | 1.540                                   | 0.033                                   |
| MLP3                                                                                                                           | 0.918          | 2.180                                    | 1.653                                   | 0.004                                   | 0.912          | 2.239                                    | 1.687                                   | -0.007                                  |
| SVM-RBF                                                                                                                        | 0.930          | 2.022                                    | 1.491                                   | -0.064                                  | 0.924          | 2.081                                    | 1.536                                   | -0.054                                  |
| <b><i>R<sub>e</sub> n/N P<sub>re</sub> P<sub>rs</sub></i> (C4)</b>                                                             |                |                                          |                                         |                                         |                |                                          |                                         |                                         |
| XGBoost4                                                                                                                       | 0.940          | 1.874                                    | 1.379                                   | 0.000                                   | 0.925          | 2.068                                    | 1.525                                   | -0.005                                  |
| Catboost4                                                                                                                      | 0.939          | 1.889                                    | 1.383                                   | 0.000                                   | 0.925          | 2.061                                    | 1.512                                   | 0.010                                   |
| LightGBM4                                                                                                                      | 0.953          | 1.659                                    | 1.231                                   | 0.000                                   | 0.922          | 2.116                                    | 1.559                                   | -0.001                                  |
| CART4                                                                                                                          | 0.919          | 2.165                                    | 1.634                                   | 0.000                                   | 0.905          | 2.342                                    | 1.767                                   | -0.007                                  |
| ET4                                                                                                                            | 0.915          | 2.223                                    | 1.696                                   | 0.000                                   | 0.909          | 2.290                                    | 1.744                                   | 0.019                                   |
| RF4                                                                                                                            | 0.986          | 0.908                                    | 0.629                                   | -0.008                                  | 0.910          | 2.272                                    | 1.682                                   | -0.009                                  |
| GBDT4                                                                                                                          | 0.940          | 1.867                                    | 1.375                                   | 0.000                                   | 0.925          | 2.073                                    | 1.525                                   | -0.003                                  |
| MLP4                                                                                                                           | 0.922          | 2.126                                    | 1.601                                   | 0.046                                   | 0.919          | 2.160                                    | 1.623                                   | 0.038                                   |
| SVM-RBF4                                                                                                                       | 0.930          | 2.022                                    | 1.491                                   | -0.064                                  | 0.926          | 2.052                                    | 1.517                                   | -0.077                                  |
| <b><i>R<sub>e</sub> n/N T<sub>max</sub> T<sub>min</sub> H<sub>0</sub> U<sub>0</sub></i> (C5)</b>                               |                |                                          |                                         |                                         |                |                                          |                                         |                                         |
| XGBoost5                                                                                                                       | 0.946          | 1.774                                    | 1.314                                   | 0.001                                   | 0.927          | 2.042                                    | 1.507                                   | 0.046                                   |
| Catboost5                                                                                                                      | 0.949          | 1.722                                    | 1.280                                   | 0.000                                   | 0.929          | 2.008                                    | 1.481                                   | 0.071                                   |
| LightGBM5                                                                                                                      | 0.964          | 1.440                                    | 1.082                                   | 0.000                                   | 0.928          | 2.034                                    | 1.497                                   | 0.039                                   |
| CART5                                                                                                                          | 0.910          | 2.287                                    | 1.730                                   | 0.000                                   | 0.893          | 2.489                                    | 1.873                                   | 0.009                                   |
| ET5                                                                                                                            | 0.915          | 2.218                                    | 1.692                                   | 0.000                                   | 0.906          | 2.321                                    | 1.766                                   | 0.003                                   |
| RF5                                                                                                                            | 0.988          | 0.843                                    | 0.580                                   | 0.008                                   | 0.916          | 2.194                                    | 1.617                                   | 0.073                                   |
| GBDT5                                                                                                                          | 0.946          | 1.770                                    | 1.312                                   | 0.000                                   | 0.927          | 2.040                                    | 1.505                                   | 0.036                                   |
| MLP5                                                                                                                           | 0.929          | 2.023                                    | 1.518                                   | 0.003                                   | 0.919          | 2.156                                    | 1.611                                   | 0.042                                   |
| SVM-RBF5                                                                                                                       | 0.931          | 2.000                                    | 1.471                                   | -0.075                                  | 0.926          | 2.057                                    | 1.517                                   | -0.052                                  |
| <b><i>R<sub>e</sub> n/N T<sub>max</sub> T<sub>min</sub> P<sub>re</sub> P<sub>rs</sub></i> (C6)</b>                             |                |                                          |                                         |                                         |                |                                          |                                         |                                         |
| XGBoost6                                                                                                                       | 0.945          | 1.795                                    | 1.325                                   | 0.000                                   | 0.928          | 2.030                                    | 1.494                                   | 0.029                                   |
| Catboost6                                                                                                                      | 0.947          | 1.757                                    | 1.295                                   | 0.000                                   | 0.929          | 2.009                                    | 1.477                                   | 0.065                                   |
| LightGBM6                                                                                                                      | 0.962          | 1.482                                    | 1.109                                   | 0.000                                   | 0.926          | 2.053                                    | 1.515                                   | 0.072                                   |
| CART6                                                                                                                          | 0.910          | 2.287                                    | 1.731                                   | 0.000                                   | 0.893          | 2.487                                    | 1.874                                   | 0.007                                   |
| ET6                                                                                                                            | 0.913          | 2.253                                    | 1.721                                   | 0.000                                   | 0.903          | 2.362                                    | 1.799                                   | 0.012                                   |
| RF6                                                                                                                            | 0.987          | 0.856                                    | 0.590                                   | 0.012                                   | 0.915          | 2.203                                    | 1.633                                   | 0.060                                   |
| GBDT6                                                                                                                          | 0.945          | 1.791                                    | 1.323                                   | 0.000                                   | 0.927          | 2.037                                    | 1.500                                   | 0.037                                   |
| MLP6                                                                                                                           | 0.927          | 2.057                                    | 1.550                                   | 0.010                                   | 0.919          | 2.158                                    | 1.626                                   | 0.032                                   |
| SVM-RBF6                                                                                                                       | 0.931          | 2.001                                    | 1.475                                   | -0.061                                  | 0.928          | 2.032                                    | 1.502                                   | -0.055                                  |
| <b><i>R<sub>e</sub> n/N T<sub>max</sub> T<sub>min</sub> H<sub>0</sub> U<sub>0</sub> P<sub>re</sub> P<sub>rs</sub></i> (C7)</b> |                |                                          |                                         |                                         |                |                                          |                                         |                                         |
| XGBoost7                                                                                                                       | 0.946          | 1.765                                    | 1.310                                   | 0.001                                   | 0.927          | 2.039                                    | 1.506                                   | 0.036                                   |
| Catboost7                                                                                                                      | 0.949          | 1.714                                    | 1.271                                   | 0.000                                   | 0.929          | 2.015                                    | 1.483                                   | 0.085                                   |
| LightGBM7                                                                                                                      | 0.966          | 1.401                                    | 1.056                                   | 0.000                                   | 0.927          | 2.041                                    | 1.506                                   | 0.058                                   |
| CART7                                                                                                                          | 0.910          | 2.286                                    | 1.730                                   | 0.000                                   | 0.893          | 2.491                                    | 1.875                                   | 0.010                                   |
| ET7                                                                                                                            | 0.910          | 2.283                                    | 1.751                                   | 0.000                                   | 0.902          | 2.383                                    | 1.822                                   | 0.014                                   |
| RF7                                                                                                                            | 0.988          | 0.848                                    | 0.582                                   | 0.015                                   | 0.916          | 2.198                                    | 1.623                                   | 0.076                                   |
| GBDT7                                                                                                                          | 0.947          | 1.760                                    | 1.306                                   | 0.000                                   | 0.927          | 2.042                                    | 1.509                                   | 0.050                                   |
| MLP7                                                                                                                           | 0.931          | 2.007                                    | 1.505                                   | -0.084                                  | 0.922          | 2.110                                    | 1.575                                   | -0.045                                  |
| SVM-RBF7                                                                                                                       | 0.929          | 2.031                                    | 1.499                                   | -0.066                                  | 0.924          | 2.089                                    | 1.548                                   | -0.056                                  |

**Table S16** Same as Table S4 but at Wulumuqi station.

| Input/Model                                                                                                                    | Training       |                                          |                                         |                                         | Testing        |                                          |                                         |                                         |
|--------------------------------------------------------------------------------------------------------------------------------|----------------|------------------------------------------|-----------------------------------------|-----------------------------------------|----------------|------------------------------------------|-----------------------------------------|-----------------------------------------|
|                                                                                                                                | R <sup>2</sup> | RMSE(MJm <sup>-2</sup> d <sup>-1</sup> ) | MAE(MJm <sup>-2</sup> d <sup>-1</sup> ) | MBE(MJm <sup>-2</sup> d <sup>-1</sup> ) | R <sup>2</sup> | RMSE(MJm <sup>-2</sup> d <sup>-1</sup> ) | MAE(MJm <sup>-2</sup> d <sup>-1</sup> ) | MBE(MJm <sup>-2</sup> d <sup>-1</sup> ) |
| <b><i>R<sub>a</sub> n/N (C1)</i></b>                                                                                           |                |                                          |                                         |                                         |                |                                          |                                         |                                         |
| XGBoost1                                                                                                                       | 0.909          | 2.678                                    | 1.831                                   | 0.000                                   | 0.898          | 2.766                                    | 2.001                                   | 0.071                                   |
| Catboost1                                                                                                                      | 0.907          | 2.717                                    | 1.851                                   | 0.000                                   | 0.900          | 2.732                                    | 1.973                                   | 0.066                                   |
| LightGBM1                                                                                                                      | 0.920          | 2.509                                    | 1.742                                   | 0.000                                   | 0.895          | 2.821                                    | 2.047                                   | 0.076                                   |
| CART1                                                                                                                          | 0.892          | 2.927                                    | 2.052                                   | 0.000                                   | 0.886          | 2.953                                    | 2.179                                   | 0.072                                   |
| ET1                                                                                                                            | 0.891          | 2.937                                    | 2.031                                   | 0.000                                   | 0.892          | 2.847                                    | 2.078                                   | 0.064                                   |
| RF1                                                                                                                            | 0.978          | 1.320                                    | 0.879                                   | 0.004                                   | 0.867          | 3.212                                    | 2.353                                   | 0.078                                   |
| GBDT1                                                                                                                          | 0.911          | 2.657                                    | 1.821                                   | 0.000                                   | 0.898          | 2.769                                    | 2.001                                   | 0.073                                   |
| MLP1                                                                                                                           | 0.891          | 2.947                                    | 2.066                                   | -0.061                                  | 0.891          | 2.871                                    | 2.117                                   | -0.002                                  |
| SVM-RBF1                                                                                                                       | 0.898          | 2.835                                    | 1.893                                   | 0.106                                   | 0.905          | 2.663                                    | 1.918                                   | 0.158                                   |
| <b><i>R<sub>a</sub> n/N T<sub>max</sub> T<sub>min</sub> (C2)</i></b>                                                           |                |                                          |                                         |                                         |                |                                          |                                         |                                         |
| XGBoost2                                                                                                                       | 0.914          | 2.597                                    | 1.756                                   | 0.000                                   | 0.900          | 2.728                                    | 1.958                                   | 0.070                                   |
| Catboost2                                                                                                                      | 0.916          | 2.564                                    | 1.722                                   | 0.000                                   | 0.903          | 2.691                                    | 1.919                                   | 0.072                                   |
| LightGBM2                                                                                                                      | 0.936          | 2.240                                    | 1.544                                   | 0.000                                   | 0.899          | 2.759                                    | 1.973                                   | 0.085                                   |
| CART2                                                                                                                          | 0.893          | 2.912                                    | 2.026                                   | 0.000                                   | 0.887          | 2.931                                    | 2.148                                   | 0.072                                   |
| ET2                                                                                                                            | 0.890          | 2.955                                    | 2.051                                   | 0.000                                   | 0.892          | 2.853                                    | 2.099                                   | 0.052                                   |
| RF2                                                                                                                            | 0.980          | 1.260                                    | 0.820                                   | -0.002                                  | 0.884          | 2.975                                    | 2.160                                   | 0.054                                   |
| GBDT2                                                                                                                          | 0.916          | 2.575                                    | 1.746                                   | 0.000                                   | 0.900          | 2.728                                    | 1.957                                   | 0.073                                   |
| MLP2                                                                                                                           | 0.892          | 2.920                                    | 2.025                                   | 0.066                                   | 0.895          | 2.813                                    | 2.058                                   | 0.128                                   |
| SVM-RBF2                                                                                                                       | 0.898          | 2.834                                    | 1.874                                   | 0.066                                   | 0.905          | 2.658                                    | 1.901                                   | 0.116                                   |
| <b><i>R<sub>a</sub> n/N H<sub>0</sub> U<sub>0</sub> (C3)</i></b>                                                               |                |                                          |                                         |                                         |                |                                          |                                         |                                         |
| XGBoost3                                                                                                                       | 0.915          | 2.597                                    | 1.767                                   | 0.000                                   | 0.901          | 2.718                                    | 1.968                                   | 0.081                                   |
| Catboost3                                                                                                                      | 0.915          | 2.594                                    | 1.755                                   | 0.000                                   | 0.902          | 2.691                                    | 1.944                                   | 0.088                                   |
| LightGBM3                                                                                                                      | 0.936          | 2.252                                    | 1.562                                   | 0.000                                   | 0.897          | 2.781                                    | 2.018                                   | 0.100                                   |
| CART3                                                                                                                          | 0.887          | 3.001                                    | 2.108                                   | 0.000                                   | 0.880          | 3.025                                    | 2.225                                   | 0.082                                   |
| ET3                                                                                                                            | 0.891          | 2.935                                    | 2.033                                   | 0.000                                   | 0.894          | 2.794                                    | 2.057                                   | 0.056                                   |
| RF3                                                                                                                            | 0.980          | 1.256                                    | 0.827                                   | -0.015                                  | 0.880          | 3.028                                    | 2.209                                   | 0.043                                   |
| GBDT3                                                                                                                          | 0.915          | 2.582                                    | 1.760                                   | 0.000                                   | 0.901          | 2.719                                    | 1.967                                   | 0.079                                   |
| MLP3                                                                                                                           | 0.896          | 2.861                                    | 1.971                                   | -0.048                                  | 0.896          | 2.796                                    | 2.050                                   | 0.027                                   |
| SVM-RBF3                                                                                                                       | 0.898          | 2.833                                    | 1.906                                   | 0.119                                   | 0.904          | 2.672                                    | 1.948                                   | 0.192                                   |
| <b><i>R<sub>a</sub> n/N P<sub>re</sub> P<sub>rs</sub> (C4)</i></b>                                                             |                |                                          |                                         |                                         |                |                                          |                                         |                                         |
| XGBoost4                                                                                                                       | 0.917          | 2.553                                    | 1.721                                   | 0.001                                   | 0.906          | 2.644                                    | 1.898                                   | 0.054                                   |
| Catboost4                                                                                                                      | 0.917          | 2.554                                    | 1.706                                   | 0.000                                   | 0.908          | 2.610                                    | 1.863                                   | 0.055                                   |
| LightGBM4                                                                                                                      | 0.935          | 2.252                                    | 1.548                                   | 0.000                                   | 0.902          | 2.708                                    | 1.943                                   | 0.065                                   |
| CART4                                                                                                                          | 0.895          | 2.883                                    | 1.995                                   | 0.000                                   | 0.889          | 2.904                                    | 2.124                                   | 0.062                                   |
| ET4                                                                                                                            | 0.893          | 2.908                                    | 2.003                                   | 0.000                                   | 0.895          | 2.782                                    | 2.033                                   | 0.067                                   |
| RF4                                                                                                                            | 0.981          | 1.223                                    | 0.802                                   | 0.002                                   | 0.884          | 2.974                                    | 2.165                                   | 0.074                                   |
| GBDT4                                                                                                                          | 0.918          | 2.538                                    | 1.714                                   | 0.000                                   | 0.905          | 2.650                                    | 1.902                                   | 0.056                                   |
| MLP4                                                                                                                           | 0.898          | 2.831                                    | 1.943                                   | -0.112                                  | 0.900          | 2.736                                    | 1.991                                   | -0.069                                  |
| SVM-RBF4                                                                                                                       | 0.901          | 2.799                                    | 1.869                                   | 0.118                                   | 0.907          | 2.621                                    | 1.894                                   | 0.164                                   |
| <b><i>R<sub>a</sub> n/N T<sub>max</sub> T<sub>min</sub> H<sub>0</sub> U<sub>0</sub> (C5)</i></b>                               |                |                                          |                                         |                                         |                |                                          |                                         |                                         |
| XGBoost5                                                                                                                       | 0.918          | 2.543                                    | 1.720                                   | 0.001                                   | 0.902          | 2.694                                    | 1.939                                   | 0.088                                   |
| Catboost5                                                                                                                      | 0.922          | 2.476                                    | 1.662                                   | 0.000                                   | 0.904          | 2.659                                    | 1.907                                   | 0.088                                   |
| LightGBM5                                                                                                                      | 0.945          | 2.084                                    | 1.441                                   | 0.000                                   | 0.900          | 2.731                                    | 1.966                                   | 0.088                                   |
| CART5                                                                                                                          | 0.887          | 2.998                                    | 2.104                                   | 0.000                                   | 0.880          | 3.026                                    | 2.225                                   | 0.082                                   |
| ET5                                                                                                                            | 0.889          | 2.968                                    | 2.066                                   | 0.000                                   | 0.890          | 2.863                                    | 2.119                                   | 0.034                                   |
| RF5                                                                                                                            | 0.981          | 1.218                                    | 0.794                                   | -0.006                                  | 0.886          | 2.938                                    | 2.133                                   | 0.047                                   |
| GBDT5                                                                                                                          | 0.919          | 2.528                                    | 1.712                                   | 0.000                                   | 0.902          | 2.700                                    | 1.942                                   | 0.087                                   |
| MLP5                                                                                                                           | 0.899          | 2.828                                    | 1.933                                   | -0.035                                  | 0.900          | 2.706                                    | 1.967                                   | 0.073                                   |
| SVM-RBF5                                                                                                                       | 0.897          | 2.847                                    | 1.900                                   | 0.070                                   | 0.903          | 2.686                                    | 1.946                                   | 0.144                                   |
| <b><i>R<sub>a</sub> n/N T<sub>max</sub> T<sub>min</sub> P<sub>re</sub> P<sub>rs</sub> (C6)</i></b>                             |                |                                          |                                         |                                         |                |                                          |                                         |                                         |
| XGBoost6                                                                                                                       | 0.920          | 2.510                                    | 1.683                                   | 0.001                                   | 0.905          | 2.646                                    | 1.890                                   | 0.054                                   |
| Catboost6                                                                                                                      | 0.922          | 2.475                                    | 1.644                                   | 0.000                                   | 0.908          | 2.600                                    | 1.842                                   | 0.048                                   |
| LightGBM6                                                                                                                      | 0.944          | 2.090                                    | 1.437                                   | 0.000                                   | 0.903          | 2.695                                    | 1.920                                   | 0.056                                   |
| CART6                                                                                                                          | 0.895          | 2.883                                    | 1.993                                   | 0.000                                   | 0.889          | 2.907                                    | 2.123                                   | 0.056                                   |
| ET6                                                                                                                            | 0.888          | 2.975                                    | 2.073                                   | 0.000                                   | 0.891          | 2.864                                    | 2.122                                   | 0.021                                   |
| RF6                                                                                                                            | 0.982          | 1.201                                    | 0.780                                   | -0.018                                  | 0.889          | 2.902                                    | 2.086                                   | 0.041                                   |
| GBDT6                                                                                                                          | 0.921          | 2.497                                    | 1.677                                   | 0.000                                   | 0.905          | 2.647                                    | 1.890                                   | 0.046                                   |
| MLP6                                                                                                                           | 0.900          | 2.807                                    | 1.911                                   | -0.012                                  | 0.899          | 2.749                                    | 2.005                                   | 0.017                                   |
| SVM-RBF6                                                                                                                       | 0.898          | 2.838                                    | 1.887                                   | 0.067                                   | 0.905          | 2.664                                    | 1.915                                   | 0.114                                   |
| <b><i>R<sub>a</sub> n/N T<sub>max</sub> T<sub>min</sub> H<sub>0</sub> U<sub>0</sub> P<sub>re</sub> P<sub>rs</sub> (C7)</i></b> |                |                                          |                                         |                                         |                |                                          |                                         |                                         |
| XGBoost7                                                                                                                       | 0.921          | 2.492                                    | 1.675                                   | 0.001                                   | 0.905          | 2.654                                    | 1.899                                   | 0.070                                   |
| Catboost7                                                                                                                      | 0.926          | 2.414                                    | 1.606                                   | 0.000                                   | 0.907          | 2.611                                    | 1.862                                   | 0.056                                   |
| LightGBM7                                                                                                                      | 0.949          | 1.991                                    | 1.373                                   | 0.000                                   | 0.901          | 2.711                                    | 1.935                                   | 0.073                                   |
| CART7                                                                                                                          | 0.888          | 2.981                                    | 2.080                                   | 0.000                                   | 0.881          | 3.009                                    | 2.206                                   | 0.066                                   |
| ET7                                                                                                                            | 0.893          | 2.911                                    | 2.012                                   | 0.000                                   | 0.893          | 2.808                                    | 2.069                                   | 0.079                                   |
| RF7                                                                                                                            | 0.982          | 1.191                                    | 0.773                                   | -0.017                                  | 0.887          | 2.932                                    | 2.110                                   | 0.049                                   |
| GBDT7                                                                                                                          | 0.922          | 2.482                                    | 1.671                                   | 0.000                                   | 0.904          | 2.664                                    | 1.906                                   | 0.063                                   |
| MLP7                                                                                                                           | 0.899          | 2.815                                    | 1.923                                   | 0.010                                   | 0.901          | 2.701                                    | 1.964                                   | 0.064                                   |
| SVM-RBF7                                                                                                                       | 0.894          | 2.893                                    | 1.945                                   | 0.053                                   | 0.900          | 2.738                                    | 1.990                                   | 0.122                                   |

**Table S17** Same as Table S4 but for all stations on average.

| Input/Model                                                                                                                    | Training       |                                          |                                         |                         | Testing        |                                          |                                         |                                         |
|--------------------------------------------------------------------------------------------------------------------------------|----------------|------------------------------------------|-----------------------------------------|-------------------------|----------------|------------------------------------------|-----------------------------------------|-----------------------------------------|
|                                                                                                                                | R <sup>2</sup> | RMSE(MJm <sup>-2</sup> d <sup>-1</sup> ) | MAE(MJm <sup>-2</sup> d <sup>-1</sup> ) | MBE(MJm <sup>-2</sup> ) | R <sup>2</sup> | RMSE(MJm <sup>-2</sup> d <sup>-1</sup> ) | MAE(MJm <sup>-2</sup> d <sup>-1</sup> ) | MBE(MJm <sup>-2</sup> d <sup>-1</sup> ) |
| <b><i>R<sub>a</sub> n/N (C1)</i></b>                                                                                           |                |                                          |                                         |                         |                |                                          |                                         |                                         |
| XGBoost1                                                                                                                       | 0.916          | 1.979                                    | 1.464                                   | 0.000                   | 0.897          | 2.159                                    | 1.622                                   | -0.011                                  |
| Catboost1                                                                                                                      | 0.913          | 2.015                                    | 1.488                                   | 0.000                   | 0.898          | 2.144                                    | 1.606                                   | -0.013                                  |
| LightGBM1                                                                                                                      | 0.924          | 1.876                                    | 1.390                                   | 0.000                   | 0.893          | 2.195                                    | 1.646                                   | -0.011                                  |
| CART1                                                                                                                          | 0.895          | 2.223                                    | 1.683                                   | 0.000                   | 0.877          | 2.380                                    | 1.820                                   | -0.013                                  |
| ET1                                                                                                                            | 0.894          | 2.233                                    | 1.692                                   | 0.000                   | 0.884          | 2.306                                    | 1.768                                   | -0.013                                  |
| RF1                                                                                                                            | 0.979          | 0.992                                    | 0.683                                   | 0.000                   | 0.866          | 2.469                                    | 1.842                                   | -0.007                                  |
| GBDT1                                                                                                                          | 0.916          | 1.971                                    | 1.460                                   | 0.000                   | 0.897          | 2.161                                    | 1.623                                   | -0.012                                  |
| MLP1                                                                                                                           | 0.901          | 2.153                                    | 1.608                                   | 0.004                   | 0.892          | 2.213                                    | 1.673                                   | -0.011                                  |
| SVM-RBF1                                                                                                                       | 0.900          | 2.153                                    | 1.587                                   | -0.052                  | 0.891          | 2.212                                    | 1.663                                   | -0.067                                  |
| Mean                                                                                                                           | 0.915          | 1.955                                    | 1.451                                   | -0.005                  | 0.888          | 2.249                                    | 1.696                                   | -0.017                                  |
| <b><i>R<sub>a</sub> n/N T<sub>max</sub> T<sub>min</sub> (C2)</i></b>                                                           |                |                                          |                                         |                         |                |                                          |                                         |                                         |
| XGBoost2                                                                                                                       | 0.926          | 1.857                                    | 1.372                                   | 0.000                   | 0.904          | 2.081                                    | 1.561                                   | 0.009                                   |
| Catboost2                                                                                                                      | 0.929          | 1.824                                    | 1.345                                   | 0.000                   | 0.907          | 2.044                                    | 1.526                                   | 0.014                                   |
| LightGBM2                                                                                                                      | 0.946          | 1.594                                    | 1.184                                   | 0.000                   | 0.904          | 2.085                                    | 1.556                                   | 0.013                                   |
| CART2                                                                                                                          | 0.897          | 2.203                                    | 1.669                                   | 0.000                   | 0.877          | 2.378                                    | 1.817                                   | -0.003                                  |
| ET2                                                                                                                            | 0.896          | 2.214                                    | 1.686                                   | 0.000                   | 0.885          | 2.291                                    | 1.762                                   | -0.012                                  |
| RF2                                                                                                                            | 0.983          | 0.889                                    | 0.610                                   | 0.002                   | 0.891          | 2.224                                    | 1.661                                   | 0.015                                   |
| GBDT2                                                                                                                          | 0.927          | 1.850                                    | 1.368                                   | 0.000                   | 0.904          | 2.080                                    | 1.560                                   | 0.009                                   |
| MLP2                                                                                                                           | 0.909          | 2.073                                    | 1.537                                   | 0.014                   | 0.900          | 2.135                                    | 1.604                                   | 0.013                                   |
| SVM-RBF2                                                                                                                       | 0.907          | 2.090                                    | 1.530                                   | -0.069                  | 0.897          | 2.156                                    | 1.612                                   | -0.070                                  |
| Mean                                                                                                                           | 0.924          | 1.844                                    | 1.367                                   | -0.006                  | 0.896          | 2.164                                    | 1.629                                   | -0.001                                  |
| <b><i>R<sub>a</sub> n/N H<sub>0</sub> U<sub>0</sub> (C3)</i></b>                                                               |                |                                          |                                         |                         |                |                                          |                                         |                                         |
| XGBoost3                                                                                                                       | 0.927          | 1.848                                    | 1.365                                   | 0.000                   | 0.902          | 2.090                                    | 1.573                                   | 0.031                                   |
| Catboost3                                                                                                                      | 0.926          | 1.851                                    | 1.364                                   | 0.000                   | 0.902          | 2.077                                    | 1.560                                   | 0.039                                   |
| LightGBM3                                                                                                                      | 0.944          | 1.615                                    | 1.201                                   | 0.000                   | 0.899          | 2.123                                    | 1.590                                   | 0.030                                   |
| CART3                                                                                                                          | 0.899          | 2.182                                    | 1.650                                   | 0.000                   | 0.878          | 2.367                                    | 1.806                                   | 0.006                                   |
| ET3                                                                                                                            | 0.898          | 2.186                                    | 1.658                                   | 0.000                   | 0.887          | 2.266                                    | 1.739                                   | -0.006                                  |
| RF3                                                                                                                            | 0.983          | 0.894                                    | 0.617                                   | -0.001                  | 0.885          | 2.275                                    | 1.705                                   | 0.026                                   |
| GBDT3                                                                                                                          | 0.927          | 1.842                                    | 1.362                                   | 0.000                   | 0.902          | 2.091                                    | 1.574                                   | 0.031                                   |
| MLP3                                                                                                                           | 0.909          | 2.063                                    | 1.534                                   | 0.013                   | 0.898          | 2.149                                    | 1.627                                   | 0.032                                   |
| SVM-RBF                                                                                                                        | 0.908          | 2.072                                    | 1.526                                   | -0.051                  | 0.896          | 2.153                                    | 1.623                                   | -0.032                                  |
| Mean                                                                                                                           | 0.925          | 1.839                                    | 1.364                                   | -0.004                  | 0.894          | 2.177                                    | 1.644                                   | 0.018                                   |
| <b><i>R<sub>a</sub> n/N P<sub>re</sub> P<sub>rs</sub> (C4)</i></b>                                                             |                |                                          |                                         |                         |                |                                          |                                         |                                         |
| XGBoost4                                                                                                                       | 0.928          | 1.836                                    | 1.362                                   | 0.000                   | 0.905          | 2.056                                    | 1.548                                   | 0.019                                   |
| Catboost4                                                                                                                      | 0.927          | 1.842                                    | 1.364                                   | 0.000                   | 0.906          | 2.040                                    | 1.532                                   | 0.023                                   |
| LightGBM4                                                                                                                      | 0.944          | 1.620                                    | 1.212                                   | 0.000                   | 0.902          | 2.089                                    | 1.567                                   | 0.020                                   |
| CART4                                                                                                                          | 0.901          | 2.158                                    | 1.632                                   | 0.000                   | 0.881          | 2.335                                    | 1.783                                   | 0.001                                   |
| ET4                                                                                                                            | 0.897          | 2.206                                    | 1.676                                   | 0.000                   | 0.886          | 2.284                                    | 1.752                                   | -0.003                                  |
| RF4                                                                                                                            | 0.983          | 0.892                                    | 0.618                                   | 0.000                   | 0.889          | 2.240                                    | 1.684                                   | 0.019                                   |
| GBDT4                                                                                                                          | 0.928          | 1.829                                    | 1.359                                   | 0.000                   | 0.905          | 2.058                                    | 1.550                                   | 0.019                                   |
| MLP4                                                                                                                           | 0.908          | 2.075                                    | 1.549                                   | -0.008                  | 0.896          | 2.159                                    | 1.634                                   | 0.009                                   |
| SVM-RBF4                                                                                                                       | 0.905          | 2.098                                    | 1.548                                   | -0.058                  | 0.894          | 2.174                                    | 1.638                                   | -0.040                                  |
| Mean                                                                                                                           | 0.925          | 1.840                                    | 1.369                                   | -0.007                  | 0.896          | 2.159                                    | 1.632                                   | 0.007                                   |
| <b><i>R<sub>a</sub> n/N T<sub>max</sub> T<sub>min</sub> H<sub>0</sub> U<sub>0</sub> (C5)</i></b>                               |                |                                          |                                         |                         |                |                                          |                                         |                                         |
| XGBoost5                                                                                                                       | 0.933          | 1.772                                    | 1.310                                   | 0.000                   | 0.907          | 2.033                                    | 1.528                                   | 0.033                                   |
| Catboost5                                                                                                                      | 0.937          | 1.723                                    | 1.270                                   | 0.000                   | 0.911          | 1.996                                    | 1.496                                   | 0.046                                   |
| LightGBM5                                                                                                                      | 0.955          | 1.449                                    | 1.081                                   | 0.000                   | 0.909          | 2.021                                    | 1.510                                   | 0.030                                   |
| CART5                                                                                                                          | 0.900          | 2.181                                    | 1.652                                   | 0.000                   | 0.877          | 2.377                                    | 1.814                                   | 0.010                                   |
| ET5                                                                                                                            | 0.900          | 2.175                                    | 1.656                                   | 0.000                   | 0.887          | 2.266                                    | 1.743                                   | -0.002                                  |
| RF5                                                                                                                            | 0.985          | 0.846                                    | 0.582                                   | 0.001                   | 0.897          | 2.152                                    | 1.612                                   | 0.035                                   |
| GBDT5                                                                                                                          | 0.933          | 1.767                                    | 1.307                                   | 0.000                   | 0.907          | 2.034                                    | 1.528                                   | 0.032                                   |
| MLP5                                                                                                                           | 0.915          | 1.992                                    | 1.472                                   | -0.005                  | 0.903          | 2.086                                    | 1.570                                   | 0.020                                   |
| SVM-RBF5                                                                                                                       | 0.910          | 2.050                                    | 1.503                                   | -0.068                  | 0.900          | 2.125                                    | 1.595                                   | -0.049                                  |
| Mean                                                                                                                           | 0.930          | 1.773                                    | 1.315                                   | -0.008                  | 0.900          | 2.121                                    | 1.600                                   | 0.017                                   |
| <b><i>R<sub>a</sub> n/N T<sub>max</sub> T<sub>min</sub> P<sub>re</sub> P<sub>rs</sub> (C6)</i></b>                             |                |                                          |                                         |                         |                |                                          |                                         |                                         |
| XGBoost6                                                                                                                       | 0.934          | 1.755                                    | 1.301                                   | 0.000                   | 0.911          | 1.996                                    | 1.503                                   | 0.025                                   |
| Catboost6                                                                                                                      | 0.937          | 1.714                                    | 1.269                                   | 0.000                   | 0.914          | 1.958                                    | 1.468                                   | 0.033                                   |
| LightGBM6                                                                                                                      | 0.955          | 1.451                                    | 1.086                                   | 0.000                   | 0.912          | 1.992                                    | 1.492                                   | 0.028                                   |
| CART6                                                                                                                          | 0.901          | 2.159                                    | 1.635                                   | 0.000                   | 0.880          | 2.346                                    | 1.792                                   | 0.006                                   |
| ET6                                                                                                                            | 0.897          | 2.202                                    | 1.680                                   | 0.000                   | 0.886          | 2.286                                    | 1.761                                   | -0.005                                  |
| RF6                                                                                                                            | 0.985          | 0.840                                    | 0.580                                   | 0.001                   | 0.900          | 2.123                                    | 1.593                                   | 0.026                                   |
| GBDT6                                                                                                                          | 0.935          | 1.748                                    | 1.299                                   | 0.000                   | 0.911          | 1.997                                    | 1.504                                   | 0.024                                   |
| MLP6                                                                                                                           | 0.914          | 2.005                                    | 1.488                                   | 0.002                   | 0.904          | 2.089                                    | 1.572                                   | 0.022                                   |
| SVM-RBF6                                                                                                                       | 0.909          | 2.069                                    | 1.522                                   | -0.069                  | 0.898          | 2.145                                    | 1.611                                   | -0.049                                  |
| Mean                                                                                                                           | 0.930          | 1.771                                    | 1.318                                   | -0.007                  | 0.902          | 2.104                                    | 1.589                                   | 0.012                                   |
| <b><i>R<sub>a</sub> n/N T<sub>max</sub> T<sub>min</sub> H<sub>0</sub> U<sub>0</sub> P<sub>re</sub> P<sub>rs</sub> (C7)</i></b> |                |                                          |                                         |                         |                |                                          |                                         |                                         |
| XGBoost7                                                                                                                       | 0.937          | 1.720                                    | 1.275                                   | 0.000                   | 0.912          | 1.986                                    | 1.495                                   | 0.031                                   |
| Catboost7                                                                                                                      | 0.941          | 1.664                                    | 1.230                                   | 0.000                   | 0.916          | 1.943                                    | 1.457                                   | 0.041                                   |
| LightGBM7                                                                                                                      | 0.960          | 1.370                                    | 1.027                                   | 0.000                   | 0.914          | 1.967                                    | 1.472                                   | 0.030                                   |
| CART7                                                                                                                          | 0.901          | 2.160                                    | 1.637                                   | 0.000                   | 0.879          | 2.354                                    | 1.798                                   | 0.005                                   |
| ET7                                                                                                                            | 0.899          | 2.182                                    | 1.663                                   | 0.000                   | 0.887          | 2.273                                    | 1.749                                   | 0.003                                   |
| RF7                                                                                                                            | 0.986          | 0.824                                    | 0.569                                   | 0.001                   | 0.902          | 2.103                                    | 1.578                                   | 0.031                                   |
| GBDT7                                                                                                                          | 0.937          | 1.715                                    | 1.273                                   | 0.000                   | 0.912          | 1.987                                    | 1.496                                   | 0.029                                   |
| MLP7                                                                                                                           | 0.917          | 1.974                                    | 1.463                                   | -0.008                  | 0.906          | 2.063                                    | 1.552                                   | 0.018                                   |
| SVM-RBF7                                                                                                                       | 0.910          | 2.058                                    | 1.517                                   | -0.066                  | 0.899          | 2.141                                    | 1.614                                   | -0.040                                  |
| Mean                                                                                                                           | 0.932          | 1.741                                    | 1.295                                   | -0.008                  | 0.903          | 2.091                                    | 1.579                                   | 0.016                                   |
